# Supplementary material
Source: PubMed Central journal article supplement (PMC7281716)
Supplement: M20-2306_Supplement.pdf [file M20-2306_Supplement.pdf]

## Supplementary Material\*

Schünemann HJ, Khabsa J, Solo K, et al. Ventilation techniques and risk for transmission of coronavirus disease, including COVID-19. A living systematic review of multiple streams of evidence. *Ann Intern Med*. 21 May 2020. [Epub ahead of print]. doi:10.7326/M20-2306

*Supplement 1. Systematic Review*

*Supplement 2. Stream 1 , 2, and 3 Search Strategy*

*Supplement 3. Stream 1, 2, 3, and 4 PRISMA Flow Chart*

*Supplement 4. Baseline Characteristics of Eligible Studies Excluded From the Analysis*

*Supplement 5. Stream 1: Characteristics of Included Studies Comparing Different Modalities of Invasive and Noninvasive Ventilation*

*Supplement 6. Results of Randomized, Adjusted, and Unadjusted Studies of SARS, MERS, and COVID-19 Patients Comparing No Ventilation, Invasive Mechanical Ventilation and Noninvasive Mechanical Ventilation by Outcome and Subgroups (Stream 1)*

*Supplement 7. Stream 2: Description of Systematic Reviews of High or Moderate Quality About the Use of Noninvasive Ventilation in Patients With Hypoxemic Respiratory Failure Since 2017*

*Supplement 8. Stream 4: Characteristics of Studies Reproduced From CADTH Review*

*Supplement 9. Risk for Severe Acute Respiratory Syndrome Transmission to Health Care Workers Exposed to Tracheal Intubation—Cohort Studies*

*Supplement 10. Risk for Severe Acute Respiratory Syndrome Transmission to Health Care Workers Exposed to Tracheal Intubation—Case–Control Studies*

*Supplement 11. Risk of SARS Transmission to HCWs Exposed and Not Exposed to Aerosol-Generating Procedures, and Aerosol-Generating Procedures as Risk Factors for SARS Transmission (Reproduced From the CADTH Original Review) (Stream 4)*

*Supplement 12. Characteristics of Included Studies of COVID-19, SARS and MERS Transmission to HCWs Exposed and Not Exposed to Aerosol-Generating Procedures, and Aerosol-Generating Procedures as Risk Factors for Transmission (2020 Update)*

*Supplement 13. Findings of Included Studies of COVID-19, SARS, and MERS Transmission to HCWs Exposed and Not Exposed to Aerosol-Generating Procedures, and Aerosol-Generating Procedures as Risk Factors for Transmission (2020 Update) (Stream 4)*

*Supplement 14. Ongoing Studies Regarding Noninvasive Ventilation, Aerosol-Generating Procedures and COVID-19*

\* This supplementary material was provided by the authors to give readers further details on their article. The material was reviewed but not copyedited.

## Supplement 1

### Systematic review

To edit the record click *Start an update* below. This will create a new version of the record - the existing version will remain unchanged.

#### 1. \* Review title.

Give the working title of the review, for example the one used for obtaining funding. Ideally the title should state succinctly the interventions or exposures being reviewed and the associated health or social problems. Where appropriate, the title should use the PI(E)COS structure to contain information on the Participants, Intervention (or Exposure) and Comparison groups, the Outcomes to be measured and Study designs to be included.

A rapid systematic review of non-invasive ventilation for the care of patients infected with COVID-19

#### 2. Original language title.

For reviews in languages other than English, this field should be used to enter the title in the language of the review. This will be displayed together with the English language title.

#### 3. \* Anticipated or actual start date.

Give the date when the systematic review commenced, or is expected to commence.

04/04/2020

#### 4. \* Anticipated completion date.

Give the date by which the review is expected to be completed.

04/05/2020

#### 5. \* Stage of review at time of this submission.

Indicate the stage of progress of the review by ticking the relevant Started and Completed boxes. Additional information may be added in the free text box provided.

Please note: Reviews that have progressed beyond the point of completing data extraction at the time of initial registration are not eligible for inclusion in PROSPERO. Should evidence of incorrect status and/or completion date being supplied at the time of submission come to light, the content of the PROSPERO record will be removed leaving only the title and named contact details and a statement that inaccuracies in the stage of the review date had been identified.

This field should be updated when any amendments are made to a published record and on completion and publication of the review. If this field was pre-populated from the initial screening questions then you are not able to edit it until the record is published.

The review has not yet started: No

| Review stage                                                    | Started | Completed |
|-----------------------------------------------------------------|---------|-----------|
| Preliminary searches                                            | Yes     | No        |
| Piloting of the study selection process                         | No      | No        |
| Formal screening of search results against eligibility criteria | No      | No        |

| Review stage                      | Started | Completed |
|-----------------------------------|---------|-----------|
| Data extraction                   | No      | No        |
| Risk of bias (quality) assessment | No      | No        |
| Data analysis                     | No      | No        |

Provide any other relevant information about the stage of the review here (e.g. Funded proposal, protocol not yet finalised).

commissioned by WHO

commissioned by WHO

## 6. \* Named contact.

The named contact acts as the guarantor for the accuracy of the information presented in the register record.

Holger Schunemann

Email salutation (e.g. "Dr Smith" or "Joanne") for correspondence:

Professor Schunemann

## 7. \* Named contact email.

Give the electronic mail address of the named contact.

schuneh@mcmaster.ca

## 8. Named contact address

**PLEASE NOTE this information will be published in the PROSPERO record so please do not enter private information**

Give the full postal address for the named contact.

Department of Health Research Methods, Evidence, and Impact  
McMaster University Health Sciences Centre, Room  
2C16  
1280 Main Street West  
Hamilton, ON L8S 4K1, Canada

## 9. Named contact phone number.

Give the telephone number for the named contact, including international dialling code.

+19055259140

## 10. \* Organisational affiliation of the review.

Full title of the organisational affiliations for this review and website address if available. This field may be completed as 'None' if the review is not affiliated to any organisation.

McMaster University

Organisation web address:

<https://canada.cochrane.org/>

## 11. \* Review team members and their organisational affiliations.

Give the personal details and the organisational affiliations of each member of the review team. Affiliation refers to groups or organisations to which review team members belong. **NOTE: email and country are now mandatory fields for each person.**

Professor Holger Schunemann. McMaster University

Elie Akl. American University of Beirut

Waleed Alhazzani. McMaster University

Sally Yaacoub. American University of Beirut  
Bram Rochweg. McMaster University  
Eddy Fan. University of Toronto  
Derek Chu. McMaster University  
Mark Loeb. McMaster University  
Dan Perri. McMaster University  
Andrea Darzi. McMaster University  
Jan Brozek. McMaster University  
Nancy Santesso. McMaster University  
Paul Garner. Liverpool School of Tropical Medicine  
Rebecca Thomas. Liverpool School of Tropical Medicine  
Miriam Taegtmeier. Liverpool School of Tropical Medicine  
Loyal Hneiny. American University of Beirut  
Neera Bhatnagar. McMaster University  
Aida Farha. American University of Beirut  
Ray Yuan Zhang. McMaster University  
Ariel Izcovich. German Hospital, Buenos Aires  
Ignacio Neumann. Pontificia Universidad Católica de Chile  
Carlos Cuello Garcia. McMaster University  
Finn Schünemann. None  
Giovanna Muti. Vita-Salute San Raffaele University  
Gian Paolo Morgano. McMaster University  
Tamara Lotfi. McMaster University  
Thomas Piggott. McMaster University  
Ewa Borowiack. Evidence Prime  
Anna Bak. Evidence Prime  
Tejan Baldeh. McMaster University  
Rosa Stalteri. McMaster University  
Chen Chen. none  
Anisa Hajizadeh. McMaster University  
Wojciech Szczeklik. Krakow University  
Leila Harrison. McMaster University  
Martin Stanulla. Medical School of Hannover, Germany  
Joanne Khabisa. American University of Beirut  
Fatima Chamseddine. American University of Beirut  
Rayane El-Khoury. American University of Beirut  
Amena El-Harakeh. American University of Beirut  
Zahra Saad. American University of Beirut  
Assem Khamis. American University of Beirut  
Pierre Abi Hanna. American University of Beirut  
Antonio Bognanni. None  
Marge Reinap. WHO Regional Office for Europe  
Imad Bou Akl. American University of Beirut

## 12. \* Funding sources/sponsors.

Give details of the individuals, organizations, groups or other legal entities who take responsibility for initiating, managing, sponsoring and/or financing the review. Include any unique identification numbers assigned to the review by the individuals or bodies listed.

World Health Organization, McMaster University, and American University of Beirut

Grant number(s)

### 13. \* Conflicts of interest.

List any conditions that could lead to actual or perceived undue influence on judgements concerning the main topic investigated in the review.

None

### 14. Collaborators.

Give the name and affiliation of any individuals or organisations who are working on the review but who are not listed as review team members. **NOTE: email and country are now mandatory fields for each person.**

Karla Solo. McMaster University

### 15. \* Review question.

State the question(s) to be addressed by the review, clearly and precisely. Review questions may be specific or broad. It may be appropriate to break very broad questions down into a series of related more specific questions. Questions may be framed or refined using PI(E)COS where relevant.

In patients with suspected or confirmed COVID-19, and hypoxemic respiratory failure what is the impact of using non-invasive ventilation (NIV), including bilevel positive airway pressure (BiPAP) or continuous positive airway pressure (CPAP) or high flow oxygen by nasal cannula (HFNC) as compared to no non-invasive mechanical ventilation?

### 16. \* Searches.

State the sources that will be searched. Give the search dates, and any restrictions (e.g. language or publication period). Do NOT enter the full search strategy (it may be provided as a link or attachment.)

We will search the following electronic databases:

PubMed, MEDLINE, EMBASE, CINAHL, and the Cochrane Library from 2019 to current date.

We will search the following Chinese electronic databases:

- WHO Chinese database
- CNKI (<http://new.oversea.cnki.net/index/>)
- China Biomedical Literature Service (<http://www.sinomed.ac.cn/login.do>)

In addition, we will search the following COVID-19 specific databases (which include preprint repositories) from 2019 to current date

- Epistemonikos COVID-19 L-OVE platform (<https://app.iloveevidence.com/loves/5e6fdb9669c00e4ac072701d>);
- EPPI Centre living systematic map of the evidence (<http://eppi.ioe.ac.uk/cms/Projects/DepartmentofHealthandSocialCare/Publishedreviews/COVID-19Livingssystematicmapoftheevidence/tabid/3765/Default.aspx>);
- CORON-19 (<https://www.kaggle.com/allen-institute-for-ai/CORON-19-research-challenge>);
- COVID-19 Research Database maintained by the World Health Organization (<https://www.who.int/emergencies/diseases/novel-coronavirus-2019/global-research-on-novel-coronavirus-2019-ncov>)

We will conduct a search for ongoing trials using the U.S. National Library of Medicine Register of Clinical Trials (ClinicalTrials.gov) and the WHO International Clinical Trials Registry Platform (ICTRP). We will hand-search the reference lists of the included papers. We will also review the studies included in any identified relevant systematic reviews.

Search strategy combines relevant medical subject headings (MeSH) and keywords, which include "COVID-19", and "corona virus". PubMed search terms are informed by <https://blocks.bmi-online.nl/catalog/397>. The search strategy has been drafted by

Ms. Layal Hneiny and is being peer reviewed by two information specialists (Ms. Neera Bhatnagar and Ms. Aida Farha). Finalized search strategies will be available on April 3, 2020 but a final draft can be found in the Supplement.

Content experts will search websites of governmental and organizational websites for relevant grey literature documents.

Additional search strategies to identify indirect evidence on SARS and MERS will also be constructed and peer-reviewed by information specialists. This latter search will focus on systematic reviews.

Languages covered: English, German, Italian, Chinese, Spanish, Portuguese, Polish, Estonian, French, Arab

## 17. URL to search strategy.

Give a link to a published pdf/word document detailing either the search strategy or an example of a search strategy for a specific database if available (including the keywords that will be used in the search strategies), or upload your search strategy.

Do NOT provide links to your search results.

Database: Ovid MEDLINE(R) and Epub Ahead of Print, In-Process & Other Non-Indexed Citations and Daily <1946 to April 03, 2020>

Search Strategy:

-----

1 (pneumonia/ or pneumonia, viral/ or exp Viruses/) and (exp Disease Outbreaks/ or exp Epidemiology/ or Epidemiology.fs.) (104390)

2 coronaviridae/ or Coronaviridae Infections/ or exp coronavirus/ or Coronavirus Infections/ or Betacoronavirus/ (13402)

3 (Betacoronavirus or Beta-coronavirus or Coronavirus\* or COVID).mp. (15546)

4 1 or 2 or 3 (119996)

5 limit 4 to ez="20020101-20200405" (85791)

6 SARS virus/ or severe acute respiratory syndrome/ or ((severe adj acute adj respiratory adj syndrome) or SARs or Sars-cov or ((sars-associated or sars-related) adj (cov or coronavirus))).mp. (11089)

7 Middle East Respiratory Syndrome Coronavirus/ or Middle East Respiratory Syndrome/ or (Mers or (middle adj east adj respiratory adj syndrome) or (middle adj east adj respiratory adj syndrome adj (associated or related) adj (coronavirus or Cov)) or Mers-Cov or ((Mers-related or mers-associated) adj (coronavirus or cov))).mp. (7985)

8 (("2019" adj (novel or new) adj corona\*) or ("2019" adj (CoV or nCoV)) or (coronavirus adj (disease adj "2019"))) or COVID19 or COVID-19 or ((Novel or New) adj Corona\*) or SARS2 or SARS-CoV-2 or (SARS adj2 (coronaviridae or coronavirus)) or ((sars or Coronavirus) adj "2") or nCov or 2019ncov).mp. (6069)

9 5 or 6 or 7 or 8 (95981)

10 Respiration, Artificial/ or exp Positive Pressure Respiration/ or Ventilator Weaning/ or exp Noninvasive ventilation/ or VENTILATORS, MECHANICAL/ or Ventilators, Negative-Pressure/ (78994)

11 (((non-invasive or noninvasive or Mechanical or pulmonary or artificial or assisted or (proportion\* adj assist\*) or helmet or nasal or pressure or volume or cuirass) adj2 (ventilat\* or respirat\*)) or (respirator adj weaning) or ((positive or negative) adj airway\*) or ((airway\* or positive) adj3 pressure) or ((volume or pressure) adj control\*) or BiPAP or ippb or ((inspiratory or intermittent) adj3 (ventilation or breathing)) or ippv or NIV or NIPPV or NPPV or NIAV or NIVM or SNIMV or NPSIMV or Aprv or cpap or ncpap or PAV or ((breath\* or respiratory or pressure or volume) adj4 (support or ((face or nasal) adj mask) or helmet))).mp. (159984)

12 10 or 11 (160751)

13 9 and 12 (1393)

Do not make this file publicly available until the review is complete

## 18. \* Condition or domain being studied.

Give a short description of the disease, condition or healthcare domain being studied. This could include health and wellbeing outcomes.

COVID-19 infection and hypoxemic respiratory failure

## 19. \* Participants/population.

Give summary criteria for the participants or populations being studied by the review. The preferred format includes details of both inclusion and exclusion criteria.

Patients with confirmed or suspected COVID-19 infection and hypoxemic respiratory failure (despite oxygen therapy) in any setting that has capacity for NIV and invasive ventilation

## 20. \* Intervention(s), exposure(s).

Give full and clear descriptions or definitions of the nature of the interventions or the exposures to be reviewed.

Non-invasive ventilation (NIV) including bilevel positive airway pressure (BiPAP) or continuous positive airway pressure (CPAP) or high flow oxygen by nasal canula (HFNC)

## 21. \* Comparator(s)/control.

Where relevant, give details of the alternatives against which the main subject/topic of the review will be compared (e.g. another intervention or a non-exposed control group). The preferred format includes details of both inclusion and exclusion criteria.

Invasive mechanical ventilation (via ETT or Tracheostomy), standard oxygen therapy or no mechanical ventilation

## 22. \* Types of study to be included.

Give details of the types of study (study designs) eligible for inclusion in the review. If there are no restrictions on the types of study design eligible for inclusion, or certain study types are excluded, this should be stated. The preferred format includes details of both inclusion and exclusion criteria.

No restrictions will be placed on study design

## 23. Context.

Give summary details of the setting and other relevant characteristics which help define the inclusion or exclusion criteria.

individuals with suspected COVID-19 infection who are waiting to be tested (e.g., presenting to a lab, emergency department), or cannot be tested (because of lack of resources or time) are eligible for inclusion

## 24. \* Main outcome(s).

Give the pre-specified main (most important) outcomes of the review, including details of how the outcome is defined and measured and when these measurement are made, if these are part of the review inclusion criteria.

- Death
- Transmission of COVID-19 to health care workers and other people
- Length of hospital stay
- Length of ICU stay
- Complications of therapy
- Secondary bacterial pneumonia
- Need for invasive ventilation
- Need for tracheostomy?
- (Time to) Recovery from COVID-19
- Aerosol generation and droplet dispersion of live virus at various distances and times)
- Contextual outcomes (acceptability, feasibility, resources use, impact on equity)

### \* Measures of effect

relative risks, odds ratios, risk difference, and/or 'number needed to treat.

## 25. \* Additional outcome(s).

List the pre-specified additional outcomes of the review, with a similar level of detail to that required for main outcomes. Where there are no additional outcomes please state 'None' or 'Not applicable' as appropriate to the review

none

\* Measures of effect

relative risks, odds ratios, risk difference

## 26. \* Data extraction (selection and coding).

Describe how studies will be selected for inclusion. State what data will be extracted or obtained. State how this will be done and recorded.

A single reviewer will extract data using a piloted form and a second reviewer will verify all extracted data. Minimal data will be extracted addressing the following domains: study identifier; study design; setting; population characteristics; intervention and comparator characteristics; outcomes (quantitative if possible); source of funding and reported conflicts of interests; ethical approval; study limitations or other important comments.

## 27. \* Risk of bias (quality) assessment.

Describe the method of assessing risk of bias or quality assessment. State which characteristics of the studies will be assessed and any formal risk of bias tools that will be used.

One reviewer will perform risk of bias assessments and a second reviewer will verify all assessments. We will use the Cochrane risk of bias tool (version 2) for randomized controlled trials, and Newcastle Ottawa scale or ROBINS-I for non-randomized studies (depending on the number of studies found).

## 28. \* Strategy for data synthesis.

Provide details of the planned synthesis including a rationale for the methods selected. This **must not be generic text** but should be **specific to your review** and describe how the proposed analysis will be applied to your data.

Our goal is to have two reviewers independently extract data using a piloted form and resolve disagreement by consensus. If the number of studies to extract data from is large, a single reviewer will extract data and a second reviewer will verify all extracted data. We will extract data addressing the following domains: study identifier; study design; setting; population characteristics; intervention and comparator characteristics; outcomes (quantitative if possible); source of funding and reported conflicts of interests; ethical approval; study limitations or other important comments.

## 29. \* Analysis of subgroups or subsets.

State any planned investigation of 'subgroups'. Be clear and specific about which type of study or participant will be included in each group or covariate investigated. State the planned analytic approach.

- Age: <18, 18 to 40, 50, 60, >60 years
- Interface (helmet compared to oronasal or full-face mask)
- Degree of hypoxia based on PF
- Comorbidities (diabetes, obesity, chronic kidney disease, congestive heart failure, COPD, asthma, chronic liver disease, hypertension, depression, actively treated malignancy, immunosuppression (due to illness or meds))
- Confirmed vs. suspected (see above) patients (testing pending, confirmation pending by public health)
- Prone positioning
- Type of healthcare setting (secondary or tertiary)
- Negative pressure vs. non-negative pressure
- Isolated vs. not.
- Radiographic pattern/finding

## 30. \* Type and method of review.

Select the type of review and the review method from the lists below. Select the health area(s) of interest for your review.

### Type of review

|                    |    |
|--------------------|----|
| Cost effectiveness | No |
| Diagnostic         | No |
| Epidemiologic      | No |



|                                             |     |
|---------------------------------------------|-----|
| Individual patient data (IPD) meta-analysis | No  |
| Intervention                                | Yes |
| Meta-analysis                               | No  |
| Methodology                                 | No  |
| Narrative synthesis                         | No  |
| Network meta-analysis                       | No  |
| Pre-clinical                                | No  |
| Prevention                                  | No  |
| Prognostic                                  | No  |
| Prospective meta-analysis (PMA)             | No  |
| Review of reviews                           | No  |
| Service delivery                            | No  |
| Synthesis of qualitative studies            | No  |
| Systematic review                           | Yes |
| Other                                       | No  |

#### Health area of the review

|                                |    |
|--------------------------------|----|
| Alcohol/substance misuse/abuse | No |
| Blood and immune system        | No |
| Cancer                         | No |
| Cardiovascular                 | No |
| Care of the elderly            | No |
| Child health                   | No |
| Complementary therapies        | No |
| Crime and justice              | No |
| Dental                         | No |
| Digestive system               | No |
| Ear, nose and throat           | No |

|                                                         |     |
|---------------------------------------------------------|-----|
| Education                                               | No  |
| Endocrine and metabolic disorders                       | No  |
| Eye disorders                                           | No  |
| General interest                                        | No  |
| Genetics                                                | No  |
| Health inequalities/health equity                       | No  |
| Infections and infestations                             | Yes |
| International development                               | No  |
| Mental health and behavioural conditions                | No  |
| Musculoskeletal                                         | No  |
| Neurological                                            | No  |
| Nursing                                                 | No  |
| Obstetrics and gynaecology                              | No  |
| Oral health                                             | No  |
| Palliative care                                         | No  |
| Perioperative care                                      | No  |
| Physiotherapy                                           | No  |
| Pregnancy and childbirth                                | No  |
| Public health (including social determinants of health) | Yes |
| Rehabilitation                                          | No  |
| Respiratory disorders                                   | Yes |
| Service delivery                                        | No  |
| Skin disorders                                          | No  |
| Social care                                             | No  |
| Surgery                                                 | No  |
| Tropical Medicine                                       | No  |
| Urological                                              | No  |

Wounds, injuries and accidents

No

Violence and abuse

No

### 31. Language.

Select each language individually to add it to the list below, use the bin icon to remove any added in error.

English

There is an English language summary.

### 32. \* Country.

Select the country in which the review is being carried out from the drop down list. For multi-national collaborations select all the countries involved.

Canada

China

England

Italy

Lebanon

Poland

### 33. Other registration details.

Give the name of any organisation where the systematic review title or protocol is registered (such as with The Campbell Collaboration, or The Joanna Briggs Institute) together with any unique identification number assigned. (N.B. Registration details for Cochrane protocols will be automatically entered). If extracted data will be stored and made available through a repository such as the Systematic Review Data Repository (SRDR), details and a link should be included here. If none, leave blank.

### 34. Reference and/or URL for published protocol.

Give the citation and link for the published protocol, if there is one

No I do not make this file publicly available until the review is complete

### 35. Dissemination plans.

Give brief details of plans for communicating essential messages from the review to the appropriate audiences.

In addition to preparing a report for WHO, we will disseminate the findings to the scientific community through publication, including in a peer-reviewed journal, and by making it available directly to core stakeholders as reports.

Do you intend to publish the review on completion?

Yes

### 36. Keywords.

Give words or phrases that best describe the review. Separate keywords with a semicolon or new line. Keywords will help users find the review in the Register (the words do not appear in the public record but are included in searches). Be as specific and precise as possible. Avoid acronyms and abbreviations unless these are in wide use.

**37. Details of any existing review of the same topic by the same authors.**

Give details of earlier versions of the systematic review if an update of an existing review is being registered, including full bibliographic reference if possible.

**38. \* Current review status.**

Review status should be updated when the review is completed and when it is published. For newregistrations the review must be Ongoing.

Review\_Ongoing

**39. Any additional information.**

Provide any other information the review team feel is relevant to the registration of the review.

**40. Details of final report/publication(s).**

This field should be left empty until details of the completed review are available.

## Supplement 2. Stream 1 search strategy

Database: Ovid MEDLINE(R) and Epub Ahead of Print, In-Process & Other Non-Indexed Citations and Daily <January 1, 2002 to May 1, 2020>

Search Strategy:

- 
- 1 (pneumonia/ or pneumonia, viral/ or exp Viruses/) and (exp Disease Outbreaks/ or exp Epidemiology/ or Epidemiology.fs.) (106155)
  - 2 coronaviridae/ or Coronaviridae Infections/ or exp coronavirus/ or Coronavirus Infections/ or Betacoronavirus/ (14903)
  - 3 (Betacoronavirus or Beta-coronavirus or Coronavirus\* or COVID).mp. (20800)
  - 4 1 or 2 or 3 (125624)
  - 5 limit 4 to ez="20020101-20200501" (90532)
  - 6 SARS virus/ or severe acute respiratory syndrome/ or ((severe adj acute adj respiratory adj (infection or syndrome)) or SARs or SARI or Sars-cov or ((sars-associated or sars-related) adj (cov or coronavirus))).mp. (14511)
  - 7 Middle East Respiratory Syndrome Coronavirus/ or Middle East Respiratory Syndrome/ or (Mers or (middle adj east adj respiratory adj syndrome) or (middle adj east adj respiratory adj syndrome adj (associated or related) adj (coronavirus or Cov)) or Mers-Cov or ((Mers-related or mers-associated) adj (coronavirus or cov))).mp. (9622)
  - 8 ("2019" adj (novel or new) adj corona\*) or ("2019" adj (CoV or nCoV)) or (coronavirus adj (disease adj "2019")) or COVID19 or COVID-19 or ((Novel or New) adj Corona\*) or SARS2 or SARS-CoV-2 or (SARS adj2 (coronaviridae or coronavirus)) or ((sars or Coronavirus) adj "2") or nCov or 2019ncov).mp. (11126)
  - 9 5 or 6 or 7 or 8 (102564)
  - 10 exp Respiration, Artificial/ or exp VENTILATORS, MECHANICAL/ or Cannula/ or exp Oxygen Inhalation Therapy/ or exp Intubation, Intratracheal/ (135597)
  - 11 (((invasive or non-invasive or noninvasive or Mechanical or pulmonary or artificial or assisted or assistance or (proportion\* adj assist\*) or helmet or nasal or pressure or volume or cuirass or support or High-Frequency or interactive or liquid or liquid-assisted or fluorocarbon or One-Lung or manual or (inverse adj ratio)) adj2 (ventilat\* or respirat\*)) or (lung adj separat\* adj technique?) or (rapid adj sequenc\* adj (intubate\* or induct\*)) or ((endotracheal or Intratracheal) adj intubat\*) or (respirator adj weaning) or ((positive or negative) adj airway\*) or ((airway\* or positive) adj3 pressure) or ((respirat\* or volume or pressure) adj control\*) or BiPAP or ippb or ((inspiratory or intermittent) adj3 (ventilation or breathing)) or ippv or NIV or NIPPV or NPPV or NIAV or NIVM or SNIMV or NPSIMV or Aprv or cpap or BCAP or bCPAP or B-CPAP or ncpap or PAV or ((breath\* or respiratory or pressure or volume) adj4 support) or ((face or nasal or oronasal or Laryngeal) adj (mask? or helmet?)) or (nasal adj3 (cannula? or oxygen or tube?)) or HFNC or optiflow\* or (oxygen adj inhalat\* adj therap\*) or (therapeutic adj hyperventilation)).mp. (197195)
  - 12 10 or 11 (230848)
  - 13 9 and 12 (1835)

\*\*\*\*\*

Database: Embase <2002 January 1 to 2020 May 1>

Search Strategy:

| No. | Query                                                                                                                                                                                                                                                                                                                                                                                                                                                                                                                                                                                                                                             | Results |
|-----|---------------------------------------------------------------------------------------------------------------------------------------------------------------------------------------------------------------------------------------------------------------------------------------------------------------------------------------------------------------------------------------------------------------------------------------------------------------------------------------------------------------------------------------------------------------------------------------------------------------------------------------------------|---------|
| #23 | #12 AND #22                                                                                                                                                                                                                                                                                                                                                                                                                                                                                                                                                                                                                                       | 8295    |
| #22 | #13 OR #14 OR #15 OR #16 OR #17 OR #18 OR #19 OR #20 OR #21<br>(((breath* OR respiratory OR pressure OR volume) NEAR/3 support):ti,ab,kw)<br>OR (((face OR nasal OR oronasal OR laryngeal) NEXT/0 (mask\$ OR<br>helmet\$)):ti,ab,kw) OR ((nasal NEAR/2 (cannula\$ OR oxygen OR<br>tube\$)):ti,ab,kw) OR hfnc:ti,ab,kw OR optiflow*:ti,ab,kw OR ((oxygen NEXT/0<br>inhalat* NEXT/0 therap*):ti,ab,kw) OR 'therapeutic hyperventilation':ti,ab,kw                                                                                                                                                                                                   | 279905  |
| #21 |                                                                                                                                                                                                                                                                                                                                                                                                                                                                                                                                                                                                                                                   | 18181   |
| #20 | ((inspiratory OR intermittent) NEAR/2 (ventilation OR breathing)):ti,ab,kw<br>((respirator NEXT/0 weaning):ti,ab,kw) OR (((positive OR negative) NEXT/0<br>airway*):ti,ab,kw) OR ((airway* OR positive) NEAR/2 pressure):ti,ab,kw) OR<br>'respiration-control':ti,ab,kw OR 'volume control':ti,ab,kw OR 'pressure<br>control*':ti,ab,kw                                                                                                                                                                                                                                                                                                           | 2167    |
| #19 | pav:ti,ab,kw OR ippv:ti,ab,kw OR niv:ti,ab,kw OR nppv:ti,ab,kw OR<br>nppv:ti,ab,kw OR niav:ti,ab,kw OR nivm:ti,ab,kw OR snimv:ti,ab,kw OR<br>npsimv:ti,ab,kw OR aprv:ti,ab,kw OR cpap:ti,ab,kw OR ncpap:ti,ab,kw OR<br>bipap:ti,ab,kw OR ippb:ti,ab,kw OR bcap:ti,ab,kw OR bcpap:ti,ab,kw OR 'b<br>cpap':ti,ab,kw                                                                                                                                                                                                                                                                                                                                 | 58676   |
| #18 |                                                                                                                                                                                                                                                                                                                                                                                                                                                                                                                                                                                                                                                   | 28993   |
| #17 | ((invasive OR noninvasive) NEAR/1 (ventilat* OR respirat*)):ti,ab,kw<br>(('non invasive' NEAR/1 respirat*):ti,ab,kw) OR ((mechanical NEAR/1<br>respirat*):ti,ab,kw) OR ((pulmonary NEAR/1 respirat*):ti,ab,kw) OR ((artificial<br>NEAR/1 respirat*):ti,ab,kw) OR (((assisted OR assistance) NEAR/1<br>respirat*):ti,ab,kw) OR (('proportional assist*' NEAR/1 respirat*):ti,ab,kw) OR<br>((helmet NEAR/1 respirat*):ti,ab,kw) OR ((nasal NEAR/1 respirat*):ti,ab,kw) OR<br>((pressure NEAR/1 respirat*):ti,ab,kw) OR ((volume NEAR/1 respirat*):ti,ab,kw)<br>OR ((cuirass NEAR/1 respirat*):ti,ab,kw) OR ((support NEAR/1<br>respirat*):ti,ab,kw) | 13392   |
| #16 |                                                                                                                                                                                                                                                                                                                                                                                                                                                                                                                                                                                                                                                   | 15827   |
| #15 | ((('high frequency' OR interactive OR liquid OR 'liquid assisted' OR fluorocarbon<br>OR 'one lung' OR manual OR 'inverse ratio') NEAR/1 (ventilat* OR<br>respirat*)):ti,ab,kw) OR ((lung NEXT/0 separat* NEXT/0 technique\$):ti,ab,kw)<br>OR ((rapid NEXT/0 sequenc* NEXT/0 (intubate* OR induct*)):ti,ab,kw) OR<br>(((endotracheal OR intratracheal) NEXT/0 intubat*):ti,ab,kw)                                                                                                                                                                                                                                                                  | 5384    |
| #14 | ((('non invasive' NEAR/1 ventilat*):ti,ab,kw) OR ((mechanical NEAR/1<br>ventilat*):ti,ab,kw) OR ((pulmonary NEAR/1 ventilat*):ti,ab,kw) OR ((artificial<br>NEAR/1 ventilat*):ti,ab,kw) OR (((assisted OR assistance) NEAR/1<br>ventilat*):ti,ab,kw) OR (('proportional assist*' NEAR/1 ventilat*):ti,ab,kw) OR<br>((helmet NEAR/1 ventilat*):ti,ab,kw) OR ((nasal NEAR/1 ventilat*):ti,ab,kw) OR<br>((pressure NEAR/1 ventilat*):ti,ab,kw) OR ((volume NEAR/1 ventilat*):ti,ab,kw)<br>OR ((cuirass NEAR/1 ventilat*):ti,ab,kw) OR ((support NEAR/1<br>ventilat*):ti,ab,kw)                                                                        | 102879  |
| #13 | 'artificial ventilation'/exp OR 'mechanical ventilator'/de OR 'negative pressure<br>ventilator'/exp                                                                                                                                                                                                                                                                                                                                                                                                                                                                                                                                               | 206448  |

|     |                                                                                                                                                                                                                                                                                                  |        |
|-----|--------------------------------------------------------------------------------------------------------------------------------------------------------------------------------------------------------------------------------------------------------------------------------------------------|--------|
| #12 | #5 OR #6 OR #7 OR #8 OR #9 OR #10 OR #11<br>'covid-19':ti,ab,kw OR covid19:ti,ab,kw OR ((2019 NEXT/0 (novel OR new)                                                                                                                                                                              | 225408 |
| #11 | NEXT/0 corona*):ti,ab,kw)<br>((2019 NEXT/0 (cov OR ncov)):ti,ab,kw) OR ((coronavirus NEXT/0 'disease                                                                                                                                                                                             | 4968   |
| #10 | 2019'):ti,ab,kw) OR (((novel OR new) NEXT/0 corona*):ti,ab,kw) OR<br>sars2:ti,ab,kw OR 'sars cov 2':ti,ab,kw OR ncov:ti,ab,kw OR 2019ncov:ti,ab,kw                                                                                                                                               | 1974   |
| #9  | mers:ti,ab,kw OR ((middle NEXT/0 east NEXT/0 respiratory NEXT/0<br>syndrome):ti,ab,kw) OR ((middle NEXT/0 east NEXT/0 respiratory NEXT/0<br>syndrome NEXT/0 (associated OR related) NEXT/0 (coronavirus OR<br>cov)):ti,ab,kw) OR 'mers cov':ti,ab,kw OR (((('mers related' OR 'mers associated') | 4675   |
| #8  | NEXT/0 (coronavirus OR cov)):ti,ab,kw)<br>'middle east respiratory syndrome'/de OR 'middle east respiratory syndrome<br>coronavirus'/de                                                                                                                                                          | 2581   |
| #7  | ((severe NEXT/0 acute NEXT/0 respiratory NEXT/0 (infection OR<br>syndrome)):ti,ab,kw) OR sars:ti,ab,kw OR sari:ti,ab,kw OR 'sars cov':ti,ab,kw OR                                                                                                                                                | 12683  |
| #6  | ((('sars associated' OR 'sars related') NEXT/0 (cov OR coronavirus)):ti,ab,kw)                                                                                                                                                                                                                   | 8730   |
| #5  | 'severe acute respiratory syndrome'/de OR 'sars-related coronavirus'/de                                                                                                                                                                                                                          | 213894 |
| #4  | #4 AND [1-1-2002]/sd                                                                                                                                                                                                                                                                             | 264340 |
| #3  | #1 OR #2 OR #3<br>betacoronavirus:ti,ab,kw OR 'beta coronavirus':ti,ab,kw OR                                                                                                                                                                                                                     | 17754  |
| #2  | coronavirus*:ti,ab,kw OR covid:ti,ab,kw<br>'coronavirus infection'/de OR 'betacoronavirus'/de OR 'coronaviridae'/de OR                                                                                                                                                                           | 4476   |
| #1  | 'coronaviridae infection'/de<br>('pneumonia'/de OR 'virus pneumonia'/de OR 'virus'/exp) AND ('epidemic'/de<br>OR 'epidemiology'/exp OR epidemiology:lnk)                                                                                                                                         | 249476 |



**PubMed (from January 1, 2002 to May 1, 2020)**

((CORonaviridae[Mesh:noexp] OR "Coronaviridae Infections"[Mesh:noexp] OR conavirus[Mesh] OR "Coronavirus Infections"[Mesh:noexp] OR BetacORonavirus[Mesh:noexp] OR pneumonia[Mesh:noexp] OR pneumonia, viral[Mesh:noexp] OR Viruses[Mesh] and "Disease Outbreaks"[Mesh] OR Epidemiology[Mesh] OR Epidemiology [Mesh subject heading] OR BetacORonavirus[tw] OR Beta-cORonavirus[tw] OR corona[tw] OR corona'[tw] OR corona's[tw] OR OR coronaviral[tw] OR coronavirdae[tw] OR coronavirida[tw] OR coronaviridae[tw] OR coronaviridea[tw] OR coronaviridiae[tw] OR coronavirinae[tw] OR coronavirion[tw] OR coronavirions[tw] OR coronavirologists[tw] OR coronavirology[tw] OR coronaviruses[tw] OR coronavirous[tw] OR coronavirues[tw] OR coronavirus[tw] OR coronavirus'[tw] OR coronavirus's[tw] OR coronaviruscpe[tw] OR coronaviruse[tw] OR coronaviruses[tw] OR coronaviruses'[tw] OR coronaviruslike[tw] OR coronaviser[tw] OR coronaviurs[tw] OR coronaviuses[tw] OR coronavrius[tw] OR coronavvirus[tw] OR COVID[tw] AND 2002/01:2020/05 [crdt] OR "SARS virus"[Mesh:noexp] OR "severe acute respiratory syndrome"[Mesh:noexp] OR severe acute respiratory syndrome\*[tw] OR SARS[tw] OR Sars-Cov[tw] OR Sars-related cov\*[tw] OR Sars-associated cov\*[tw] OR Sars-related coronavirus\*[tw] OR Sars-associated corovavirus\*[tw] OR Severe Acute Respiratory Infection\*[tw] OR SARI[tw] OR "Middle East Respiratory Syndrome Coronavirus"[Mesh:noexp] OR "Middle East Respiratory Syndrome"[Mesh:noexp] OR Mers OR middle east respiratory syndrome\*[tw] OR middle east respiratory syndrome-associated coronavirus\*[tw] OR middle east respiratory syndrome-associated cov\*[tw] OR middle east respiratory syndrome-related\*[tw] OR middle east respiratory syndrome-related cov\*[tw] OR middle east respiratory syndrome-related coronavirus\*[tw] OR Mers-Cov[tw] OR Mers-related coronavirus\*[tw] OR Mers-associated coronavirus\*[tw] OR Mers-related Cov\*[tw] OR Mers-associated Cov\*[tw] OR 2019-novel-corona\* OR 2019-new-corona\* OR novel-corona\* OR new-corona\* OR 2019-Cov OR 2019-nCov OR nCov OR coronavirus disease-2019 OR SARS2 OR SARS-2 OR SARS-CoV-2 OR sars cORona\* OR CORonavirus-2 OR 2019ncov)) AND (assistance in ventilat\*[tw] OR Ventilation assistance\*[tw] OR assistance in ventilation[tw] OR cuirass ventilat\*[tw] OR cuirass respirat\*[tw] OR non-invasive ventilat\*[tw] OR noninvasive ventilat\*[tw] OR non-invasive respirat\*[tw] OR noninvasive respirat\*[tw] OR Mechanical ventilat\*[tw] OR Mechanical respirat\*[tw] OR pulmonary ventilat\*[tw] OR pulmonary respirat\*[tw] OR artificial ventilat\*[tw] OR artificial respirat\*[tw] OR assisted ventilat\*[tw] OR assisted respirat\*[tw] OR proportional-assisted ventilat\*[tw] OR proportional-assisted respirat\*[tw] OR proportion-assisted ventilat\*[tw] OR proportion-assisted respirat\*[tw] OR helmet-based respirat\*[tw] OR helmet-based ventilat\*[tw] OR nasal ventilat\*[tw] OR nasal respirat\*[tw] OR pressure-based respirat\*[tw] OR pressure-based ventilat\*[tw] OR pressure respirat\*[tw] OR pressure ventilat\*[tw] OR volume ventilat\*[tw] OR volume respirat\*[tw] OR respirator weaning\*[tw] OR respirators weaning\*[tw] OR positive airway\*[tw] OR negative airway\*[tw] OR airway pressure\*[tw] OR positive pressure\*[tw] OR volume-control\*[tw] OR pressure-control\*[tw] OR BiPAP[tw] or ippb[tw] OR inspiratory breathing\*[tw] OR inspiratory ventilation\*[tw] OR

intermittent ventilation\*[tw] OR intermittent breathing\*[tw] ippv[tw] OR NIV[tw] OR NIPPV[tw] OR NPPV[tw] OR NIAV[tw] OR NIVM[tw] OR SNIMV[tw] OR NPSIMV[tw] OR Aprv[tw] OR cpap[tw] OR ncpap[tw] OR PAV[tw] OR breathing support\*[tw] OR respiratory support\*[tw] OR pressure support\*[tw] OR BCAP[tw] OR bCPAP[tw] OR B-CPAP[tw] OR volume support\*[tw] OR oxygen inhalation therap\*[tw] OR Nasal cannula\*[tw] OR Nasal tube\*[tw] OR Oronasal mask\*[tw] OR Optiflow\*[tw] OR HFNC[tw] OR High Flow Nasal Oxygen Therap\*[tw] OR Nasal high flow oxygen\*[tw] OR high-frequency oscillation ventilat\* [tw] OR high frequency ventilat\*[tw] OR High-Frequency Jet Ventilat\*[tw] OR Interactive Ventilatory Support\*[tw] OR Liquid Ventilat\*[tw] OR Liquid -assisted ventilat\*[tw] OR fluorocarbon ventilat\*[tw] OR One-Lung Ventilat\*[tw] OR Lung separation technique\*[tw] OR Laryngeal Mask\*[tw] OR Rapid sequence induc\*[tw] OR Rapid sequence intubat\*[tw] OR Intratracheal intubat\*[tw] OR endotracheal intubat\*[tw] OR manual ventilat\*[tw] OR inverse-ratio ventilat\*[tw] OR respiration control\*[w] OR therapeutic hyperventilate\*[tw] OR "Respiration, Artificial"[Mesh] OR "Ventilators, Mechanical"[Mesh:NoExp] OR "Cannula"[Mesh:NoExp] OR "Oxygen Inhalation Therapy"[Mesh:NoExp] OR "Intubation, Intratracheal"[Mesh]) (983)

## Cochrane Library (from January 1, 2002 to May 1, 2020)

| ID  | Search Hits                                                                                                                                                                                                                                                                    |
|-----|--------------------------------------------------------------------------------------------------------------------------------------------------------------------------------------------------------------------------------------------------------------------------------|
| #1  | MeSH descriptor: [Pneumonia, Viral] this term only 65                                                                                                                                                                                                                          |
| #2  | MeSH descriptor: [Pneumonia] this term only 2038                                                                                                                                                                                                                               |
| #3  | MeSH descriptor: [Viruses] explode all trees 8821                                                                                                                                                                                                                              |
| #4  | #1 OR #2 OR #3 10874                                                                                                                                                                                                                                                           |
| #5  | MeSH descriptor: [Disease Outbreaks] explode all trees 269                                                                                                                                                                                                                     |
| #6  | MeSH descriptor: [Epidemiology] explode all trees 39                                                                                                                                                                                                                           |
| #7  | (Epidemiology):ti,ab,kw 49062                                                                                                                                                                                                                                                  |
| #8  | #5 OR #6 OR #7 49162                                                                                                                                                                                                                                                           |
| #9  | #4 AND #8 1336                                                                                                                                                                                                                                                                 |
| #10 | MeSH descriptor: [undefined] explode all trees 0                                                                                                                                                                                                                               |
| #11 | MeSH descriptor: [Coronavirus] explode all trees 13                                                                                                                                                                                                                            |
| #12 | MeSH descriptor: [Coronaviridae Infections] this term only 3                                                                                                                                                                                                                   |
| #13 | MeSH descriptor: [Coronavirus Infections] this term only 137                                                                                                                                                                                                                   |
| #14 | MeSH descriptor: [Betacoronavirus] explode all trees 12                                                                                                                                                                                                                        |
| #15 | (Betacoronavirus or Beta-coronavirus or Coronavirus* or COVID):ti,ab,kw 397                                                                                                                                                                                                    |
| #16 | #9 OR #10 OR #11 OR #12 OR #13 OR #14 OR #15 with Cochrane Library publication date Between Jan 2002 and May 2020 1448                                                                                                                                                         |
| #17 | MeSH descriptor: [SARS Virus] this term only 9                                                                                                                                                                                                                                 |
| #18 | MeSH descriptor: [Severe Acute Respiratory Syndrome] this term only 107                                                                                                                                                                                                        |
| #19 | ((severe NEXT acute NEXT respiratory NEXT (infection OR syndrome)) or SARs or SARI or Sars-cov or ((sars-associated or sars-related) NEXT (cov or coronavirus))):ti,ab,kw 455                                                                                                  |
| #20 | #17 OR #18 OR #19 455                                                                                                                                                                                                                                                          |
| #21 | MeSH descriptor: [Middle East Respiratory Syndrome Coronavirus] this term only 1                                                                                                                                                                                               |
| #22 | ((middle NEXT east NEXT respiratory NEXT syndrome NEXT(associated OR related) NEXT (coronavirus or Cov))):ti,ab,kw 0                                                                                                                                                           |
| #23 | ((Mers-related or mers-associated) NEXT (coronavirus or cov))):ti,ab,kw 0                                                                                                                                                                                                      |
| #24 | ((middle NEXT east NEXT respiratory NEXT syndrome)):ti,ab,kw 20                                                                                                                                                                                                                |
| #25 | (Mers or Mers-Cov):ti,ab,kw 51                                                                                                                                                                                                                                                 |
| #26 | #21 OR #22 OR #23 OR #24 OR #25 53                                                                                                                                                                                                                                             |
| #27 | ((2019 NEXT (novel or new) NEXT corona*)):ti,ab,kw 17                                                                                                                                                                                                                          |
| #28 | (("2019" NEXT (CoV or nCoV)) or (coronavirus NEXT (disease NEXT "2019"))) or COVID19 or COVID-19 or ((Novel or New) NEXT Corona*) or SARS2 or SARS-CoV-2 or (SARS NEAR/1 (coronaviridae or coronavirus)) or ((sars or Coronavirus) NEXT "2") or nCov or 2019ncov):ti,ab,kw 414 |
| #29 | #27 OR #28 414                                                                                                                                                                                                                                                                 |
| #30 | #16 OR #20 OR #26 OR #29 1827                                                                                                                                                                                                                                                  |
| #31 | MeSH descriptor: [Respiration, Artificial] explode all trees 6021                                                                                                                                                                                                              |

- #32 MeSH descriptor: [Cannula] this term only 71
- #33 MeSH descriptor: [Oxygen Inhalation Therapy] this term only 1123
- #34 MeSH descriptor: [Intubation, Intratracheal] explode all trees 4308
- #35 MeSH descriptor: [Ventilators, Mechanical] explode all trees 264
- #36 (((invasive or non-invasive or noninvasive or Mechanical or pulmonary or artificial or assisted or assistance or (proportion\* NEXT assist\*) or helmet or nasal or pressure or volume or cuirass or support or High-Frequency or interactive or liquid or liquid-assisted or fluorocarbon or One-Lung or manual or (inverse NEXT ratio)) NEAR/1 (ventilat\* or respirat\*)) or (lung NEXT seperat\* NEXT technique?) or (rapid NEXT sequenc\* NEXT (intubate\* or induct\*)) or ((endotracheal or Intratracheal) NEXT intubat\*) or (respirator NEXT weaning) or ((positive or negative) NEXT airway\*) or ((airway\* or positive) NEAR/2 pressure) or ((respirat\* or volume or pressure) NEXT control\*) or BiPAP or ippb or ((inspiratory or intermittent) NEAR/2 (ventilation or breathing)) or ippv or NIV or NIPPV or NPPV or NIAV or NIVM or SNIMV or NPSIMV or Aprv or cpap or ncpap or PAV or BCAP or bCPAP or B-CPAP or ((breath\* or respiratory or pressure or volume) NEAR/3 support) or ((face or nasal or oronasal or Laryngeal) NEXT (mask? or helmet?)) or (oxygen NEXT inhalat\* NEXT therap\*) or (nasal NEAR/2 (cannula? or oxygen or tube?)) or HFNC or optiflow\* or (oxygen NEXT inhalat\* NEXT therap\*) or (therapeutic NEXT hyperventilation)):ti,ab,kw 38229
- #37 #31 OR #32 OR #33 OR #34 OR #35 OR #36 39943
- #38 #30 AND #37 130

**CINAHL (inception to May 1, 2020)**

| #   | Query                                                                                                                                                                                                                                                                                                                                                                                                                                                                                                                                                                           | Limiters/Expanders                                                     | Last Run Via                                                                                              | Results |
|-----|---------------------------------------------------------------------------------------------------------------------------------------------------------------------------------------------------------------------------------------------------------------------------------------------------------------------------------------------------------------------------------------------------------------------------------------------------------------------------------------------------------------------------------------------------------------------------------|------------------------------------------------------------------------|-----------------------------------------------------------------------------------------------------------|---------|
| S12 | S8 AND S11                                                                                                                                                                                                                                                                                                                                                                                                                                                                                                                                                                      | Expanders - Apply equivalent subjects<br>Search modes - Boolean/Phrase | Interface - EBSCOhost Research Databases<br>Search Screen - Advanced Search<br>Database - CINAHL Complete | 1367    |
| S11 | S9 OR S10                                                                                                                                                                                                                                                                                                                                                                                                                                                                                                                                                                       | Expanders - Apply equivalent subjects<br>Search modes - Boolean/Phrase | Interface - EBSCOhost Research Databases<br>Search Screen - Basic Search<br>Database - CINAHL Complete    | 76,695  |
| S10 | TI ( ((invasive OR non-invasive OR noninvasive OR invasive OR Mechanical OR pulmonary OR artificial OR assisted OR assistance OR (proportion* W0 assist*) OR helmet OR nasal OR pressure OR volume or cuirass OR support OR High-Frequency OR interactive OR liquid OR liquid-assisted OR fluorocarbon OR One-Lung OR manual OR (inverse W0 ratio)) N1 (ventilat* or respirat*)) OR (lung W0 seperat* W0 technique#) OR (rapid W0 sequenc* W0 (intubate* OR induct*)) or ((endotracheal OR Intratracheal) W0 intubat*) OR (respirator W0 weaning) OR ((positive OR negative) W0 | Expanders - Apply equivalent subjects<br>Search modes - Boolean/Phrase | Interface - EBSCOhost Research Databases<br>Search Screen - Basic Search<br>Database - CINAHL Complete    | 60,704  |

airway\*) OR ((airway\* OR positive)  
N2 pressure) OR ((respirat\* or  
volume or pressure) W0 control\*) OR  
BiPAP OR ippb OR ((inspiratory OR  
intermittent) N2 (ventilation OR  
breathing)) OR ippv OR NIV OR NIPPV  
OR NPPV OR NIAV OR NIVM OR  
SNIMV OR NPSIMV OR Aprv OR cpap  
OR bCPAP OR B-CPAP OR BCAP OR  
ncpap OR PAV OR ((breath\* OR  
respiratory OR pressure OR volume)  
N3 support) OR ((face OR nasal OR  
oronasal OR Laryngeal) W0 (mask# or  
helmet#)) OR (oxygen W0 inhalat\*  
W0 therap\*) OR (nasal N2 (cannula#  
OR oxygen OR tube#)) OR HFNC OR  
optiflow\* OR (oxygen W0 inhalat\*  
W0 therap\*) OR (therapeutic W0  
hyperventilation)) ) OR AB ( ((invasive  
OR non-invasive OR noninvasive OR  
Mechanical OR pulmonary OR  
artificial OR assisted OR assistance OR  
(proportion\* W0 assist\*) OR helmet  
OR nasal OR pressure OR volume or  
cuirass OR support OR High-  
Frequency OR interactive OR liquid  
OR liquid-assisted OR fluorocarbon  
OR One-Lung OR manual OR (inverse  
W0 ratio)) N1 (ventilat\* or respirat\*))

OR (lung W0 separat\* W0  
technique#) OR (rapid W0 sequenc\*  
W0 (intubate\* OR induct\*)) or  
((endotracheal OR Intratracheal) W0  
intubat\*) OR (respirator W0 weaning)  
OR ((positive OR negative) W0  
airway\*) OR ((airway\* OR positive  
N2 pressure) OR ((respirat\* or  
volume or pressure) W0 control\*) OR  
BiPAP OR ippb OR ((inspiratory OR  
intermittent) N2 (ventilation OR  
breathing)) OR ippv OR NIV OR NIPPV  
OR NPPV OR NIAV OR NIVM OR  
SNIMV OR NPSIMV OR Aprv OR cpap  
OR bCPAP OR B-CPAP OR BCAP OR  
ncpap OR PAV OR ((breath\* OR  
respiratory OR pressure OR volume)  
N3 support) OR ((face OR nasal OR  
oronasal OR Laryngeal) W0 (mask# or  
helmet#)) OR (oxygen W0 inhalat\*  
W0 therap\*) OR (nasal N2 (cannula#  
OR oxygen OR tube#)) OR HFNC OR  
optiflow\* OR (oxygen W0 inhalat\*  
W0 therap\*) OR (therapeutic W0  
hyperventilation)) ) OR MW (  
((invasive OR non-invasive OR  
noninvasive OR Mechanical OR  
pulmonary OR artificial OR assisted  
OR assistance OR (proportion\* W0

assist\*) OR helmet OR nasal OR  
pressure OR volume or cuirass OR  
support OR High-Frequency OR  
interactive OR liquid OR liquid-  
assisted OR fluorocarbon OR One-  
Lung OR manual OR (inverse W0  
ratio)) N1 (ventilat\* or respirat\*) OR  
(lung W0 separat\* W0 technique#)  
OR (rapid W0 sequenc\* W0  
(intubate\* OR induct\*)) or  
((endotracheal OR Intratracheal) W0  
intubat\*) OR (respirator W0 weaning)  
OR ((positive OR negative) W0  
airway\*) OR ((airway\* OR positive  
N2 pressure) OR ((respirat\* or  
volume or pressure) W0 control\*) OR  
BiPAP OR ippb OR ((inspiratory OR  
intermittent) N2 (ventilation OR  
breathing)) OR ippv OR NIV OR NIPPV  
OR NPPV OR NIAV OR NIVM OR  
SNIMV OR NPSIMV OR Aprv OR cpap  
OR bCPAP OR B-CPAP OR BCAP OR  
ncpap OR PAV OR ((breath\* OR  
respiratory OR pressure OR volume)  
N3 support) OR ((face OR nasal OR  
oronasal OR Laryngeal) W0 (mask# or  
helmet#)) OR (oxygen W0 inhalat\*  
W0 therap\*) OR (nasal N2 (cannula#  
OR oxygen OR tube#)) OR HFNC OR



|    |                                                                                                                                                                                                                                                                                                                                                                                                                         |                                                                                |                                                                                                                 |        |
|----|-------------------------------------------------------------------------------------------------------------------------------------------------------------------------------------------------------------------------------------------------------------------------------------------------------------------------------------------------------------------------------------------------------------------------|--------------------------------------------------------------------------------|-----------------------------------------------------------------------------------------------------------------|--------|
|    | <p>optiflow* OR (oxygen W0 inhalat* W0 therap*) OR (therapeutic W0 hyperventilation)) )</p>                                                                                                                                                                                                                                                                                                                             |                                                                                |                                                                                                                 |        |
| S9 | <p>(MH "Respiration, Artificial+") OR (MH "Ventilators, Mechanical") OR (MH "Mechanical Ventilation (Iowa NIC)") OR (MH "Ventilation Assistance (Iowa NIC)") OR (MH "Respiratory Therapy Equipment and Supplies+") OR (MH "Intubation, Intratracheal")</p>                                                                                                                                                              | <p>Expanders - Apply equivalent subjects<br/>Search modes - Boolean/Phrase</p> | <p>Interface - EBSCOhost Research Databases<br/>Search Screen - Basic Search<br/>Database - CINAHL Complete</p> | 54,850 |
| S8 | S4 OR S5 OR S6 OR S7                                                                                                                                                                                                                                                                                                                                                                                                    | <p>Expanders - Apply equivalent subjects<br/>Search modes - Boolean/Phrase</p> | <p>Interface - EBSCOhost Research Databases<br/>Search Screen - Basic Search<br/>Database - CINAHL Complete</p> | 83,418 |
| S7 | <p>TI ( ("2019" W0 (novel OR new) W0 corona*) OR ("2019" W0 (CoV OR nCoV)) OR (coronavirus W0 disease W0 "2019 ") OR COVID19 OR COVID-19 OR ((Novel OR New) W0 Corona*) OR SARS2 OR SARS-CoV-2 OR (SARS N1 (coronaviridae OR coronavirus)) OR ((sars OR Coronavirus) W0 "2") OR nCov OR 2019ncov ) OR AB ( ("2019" W0 (novel OR new) W0 corona*) OR ("2019" W0 (CoV OR nCoV)) OR (coronavirus W0 disease W0 "2019")</p> | <p>Expanders - Apply equivalent subjects<br/>Search modes - Boolean/Phrase</p> | <p>Interface - EBSCOhost Research Databases<br/>Search Screen - Basic Search<br/>Database - CINAHL Complete</p> | 1,953  |

OR COVID19 OR COVID-19 OR ((Novel  
 OR New) W0 Corona\*) OR SARS2 OR  
 SARS-CoV-2 OR (SARS N1  
 (coronaviridae OR coronavirus)) OR  
 ((sars OR Coronavirus) W0 "2") OR  
 nCov OR 2019ncov ) OR MW ( ("2019"  
 W0 (novel OR new) W0 corona\*) OR  
 ("2019" W0 (CoV OR nCoV)) OR  
 (coronavirus W0 disease W0 "2019")  
 OR COVID19 OR COVID-19 OR  
 ((Novel OR New) W0 Corona\*) OR  
 SARS2 OR SARS-CoV-2 OR (SARS  
 N1 (coronaviridae OR coronavirus))  
 OR ((sars OR Coronavirus) W0 "2")  
 OR nCov OR 2019ncov )

TI ( (Mers OR (middle W0 east W0  
 respiratory W0 syndrome) OR  
 (middle W0 east W0 respiratory W0  
 syndrome W0 (associated OR related)  
 W0 (coronavirus OR Cov)) OR Mers-  
 Cov OR ((Mers-related OR mers-  
 associated) W0 (coronavirus OR  
 cov))) ) OR AB ( (Mers OR (middle W0  
 east W0 respiratory W0 syndrome)  
 OR (middle W0 east W0 respiratory  
 W0 syndrome W0 (associated OR  
 related) W0 (coronavirus OR Cov)) OR

Expanders - Apply equivalent  
 subjects  
 Search modes - Boolean/Phrase

Interface - EBSCOhost Research Databases  
 Search Screen - Basic Search  
 Database - CINAHL Complete

Mers-Cov OR ((Mers-related OR mers-associated) W0 (coronavirus OR cov))) ) OR MW ( (Mers OR (middle W0 east W0 respiratory W0 syndrome) OR (middle W0 east W0 respiratory W0 syndrome W0 (associated OR related) W0 (coronavirus OR Cov)) OR Mers-Cov OR ((Mers-related OR mers-associated) W0 (coronavirus OR cov))) )

TI ( ((severe W0 acute W0 respiratory W0 syndrome) OR SARs OR Sars-cov OR ((sars-associated OR sars-related) W0 (cov OR coronavirus))) OR SARI OR ((severe W0 acute W0 respiratory W0 (infection or syndrome))) OR AB ( ((severe W0 acute W0 respiratory W0 syndrome) OR SARs OR Sars-cov OR ((sars-associated OR sars-related) W0 (cov OR coronavirus))) OR SARI OR ((severe W0 acute W0 respiratory W0 (infection or syndrome))) OR MW ( ((severe W0 acute W0 respiratory W0 syndrome) OR SARs OR Sars-cov OR ((sars-associated OR sars-related) W0 (cov OR coronavirus))) OR SARI OR

Expanders - Apply equivalent subjects  
Search modes - Boolean/Phrase

Interface - EBSCOhost Research Databases  
Search Screen - Basic Search  
Database - CINAHL Complete

|    |                                                                                                                                                                                                                   |                                                                        |                                                                                                        |        |
|----|-------------------------------------------------------------------------------------------------------------------------------------------------------------------------------------------------------------------|------------------------------------------------------------------------|--------------------------------------------------------------------------------------------------------|--------|
|    | ((severe W0 acute W0 respiratory W0 infection or syndrome)))                                                                                                                                                      |                                                                        |                                                                                                        |        |
| S4 | S1 OR S2 OR S3                                                                                                                                                                                                    | Expanders - Apply equivalent subjects<br>Search modes - Boolean/Phrase | Interface - EBSCOhost Research Databases<br>Search Screen - Basic Search<br>Database - CINAHL Complete | 80,522 |
| S3 | TI ( Betacoronavirus OR Beta-coronavirus or Coronavirus* OR COVID ) OR AB ( Betacoronavirus OR Beta-coronavirus or Coronavirus* OR COVID ) OR MW ( Betacoronavirus OR Beta-coronavirus or Coronavirus* OR COVID ) | Expanders - Apply equivalent subjects<br>Search modes - Boolean/Phrase | Interface - EBSCOhost Research Databases<br>Search Screen - Basic Search<br>Database - CINAHL Complete | 2,315  |
| S2 | (MH "Coronaviridae+") OR (MH "Coronaviridae Infections+")                                                                                                                                                         | Expanders - Apply equivalent subjects<br>Search modes - Boolean/Phrase | Interface - EBSCOhost Research Databases<br>Search Screen - Basic Search<br>Database - CINAHL Complete | 3,525  |
| S1 | ((MH "Pneumonia") OR (MH "Pneumonia, Viral") OR (MH "Virus Diseases+") OR ("MH Viruses+")) AND ((MH "Disease Outbreaks") OR (MH "Epidemiology+") OR SU Epidemiology)                                              | Expanders - Apply equivalent subjects<br>Search modes - Boolean/Phrase | Interface - EBSCOhost Research Databases<br>Search Screen - Basic Search<br>Database - CINAHL Complete | 78,443 |

## Chinese databases

Database: CNKI (**inception to May 1, 2020**)

Search Strategy:

SU= (病毒性肺炎 + 疾病爆发 + 冠状病毒 + 新型病毒+CoV+COVID19+急性呼吸窘迫综合征+中东呼吸综合征+非典+非典型肺炎+非典冠状病毒 +sars+mers)\*( 人工通气 + 辅助呼吸 + 机械通气 + 插管 + 氧气吸入治疗 + 氧气治疗 + 气管内插管 + 气管插管 + 无创 + 有创 + 呼吸机 + 通气 + NIV + 氧疗)

Result: 3832

Database: Sinomed (**inception to May 1, 2020**)

Search Strategy:

("冠状病毒"[常用字段:智能] OR "新冠肺炎"[常用字段:智能] OR "cov"[常用字段:智能] OR "急性呼吸窘迫综合征"[常用字段:智能] OR "中东呼吸综合征"[常用字段:智能] OR "mers"[常用字段:智能] OR "非典"[常用字段:智能] OR "非典型肺炎"[常用字段:智能] OR "sars"[常用字段:智能]) and ("人工呼吸"[常用字段:智能] OR "机械通气"[常用字段:智能] OR "插管"[常用字段:智能] OR "氧气治疗"[常用字段:智能] OR "无创"[常用字段:智能] OR "有创"[常用字段:智能] OR "呼吸机"[常用字段:智能] OR "氧疗"[常用字段:智能] OR "吸氧"[常用字段:智能])

Result: 6433

Database: Wanfang (**inception to May 1, 2020**)

Search Strategy:

( ( 病毒性肺炎 + 肺炎 + 病毒 ) \* ( 疾病爆发 + 流行病 ) + 新冠肺炎 + 冠状病毒 + 非典 + sars + 中东综合征 + mers ) \* ( 人工通气 + 辅助呼吸 + 机械通气 + 插管 + 氧气吸入治疗 + 氧气治疗 + 气管内插管 + 气管插管 + 无创 + 有创 + 呼吸机 + NIV + 氧疗 + 通气 + NIPPV + NPPV + NIVM + SNIMV + NPSIMV + Aprv + cpap + ncpap + PAV + HFNC + 经鼻高流量氧疗 )

Result: 4995

Database: VIP (inception to May 1, 2020)

Search Strategy:

M= ( ( 病毒性肺炎 + 肺炎 + 病毒 ) \* ( 疾病爆发 + 流行病 ) + 新冠肺炎 + 冠状病毒 + 非典 + sars + 中东综合征 + mers ) \* ( 人工通气 + 辅助呼吸 + 机械通气 + 插管 + 氧气吸入治疗 + 氧气治疗 + 气管内插管 + 气管插管 + 无创 + 有创 + 呼吸机 + NIV + 氧疗 + 通气 + NIPPV + NPPV + NIVM + SNIMV + NPSIMV + Aprv + cpap + ncpap + PAV + HFNC + 经鼻高流量氧疗 )

Result: 278

WHO Chinese databases (Feb 2, 2020 to May 1, 2020)

Search Strategy:

#1 “2019冠状病毒”

#2 “新型冠状病毒”

#3 “新冠肺炎”

#4 “武汉2019”

#5 “武汉病毒”

#6 “武汉肺炎”

#7 "2019-nCoV"

#8 "SARS-CoV-2"

#9 "Novel coronavirus"

#10 "nCoV"

#11 "Emerging Coronavirus"

#12 "new coronavirus"

#13 "COVID-19"

#14 "coronavirus"

#15 OR/#1-#14

Result: 1800

## Supplement. Stream 2 search strategy

Database: Ovid MEDLINE(R) and Epub Ahead of Print, In-Process & Other Non-Indexed Citations and Daily <January 1, 2017 to May 1, 2020>

Search Strategy:

- 
- 1 exp Respiration, Artificial/ or exp VENTILATORS, MECHANICAL/ or Cannula/ or exp Oxygen Inhalation Therapy/ or exp Intubation, Intratracheal/ (135597)
  - 2 (((invasive or non-invasive or noninvasive or Mechanical or pulmonary or artificial or assisted or assistance or (proportion\* adj assist\*) or helmet or nasal or pressure or volume or cuirass or support or High-Frequency or interactive or liquid or liquid-assisted or fluorocarbon or One-Lung or manual or (inverse adj ratio)) adj2 (ventilat\* or respirat\*)) or (lung adj separat\* adj technique?) or (rapid adj sequenc\* adj (intubate\* or induct\*)) or ((endotracheal or Intratracheal) adj intubat\*) or (respirator adj weaning) or ((positive or negative) adj airway\*) or ((airway\* or positive) adj3 pressure) or ((respirat\* or volume or pressure) adj control\*) or BiPAP or ippb or ((inspiratory or intermittent) adj3 (ventilation or breathing)) or ippv or NIV or NIPPV or NPPV or NIAV or NIVM or SNIMV or NPSIMV or Aprv or cpap or BCAP or bCPAP or B-CPAP or ncpap or PAV or ((breath\* or respiratory or pressure or volume) adj4 support) or ((face or nasal or oronasal or Laryngeal) adj (mask? or helmet?)) or (nasal adj3 (cannula? or oxygen or tube?)) or HFNC or optiflow\* or (oxygen adj inhalat\* adj therap\*) or (therapeutic adj hyperventilation)).mp. (197195)
  - 3 1 or 2 (230848)
  - 4 (Meta-Analysis as Topic/ or meta analy\$.tw. or metaanaly\$.tw. or Meta-Analysis/ or (systematic adj (review\$1 or overview\$1)).tw. or exp Review Literature as Topic/ or cochrane.ab. or embase.ab. or (psychlit or psyclit).ab. or (psychinfo or psycinfo).ab. or (cinahl or cinhal).ab. or science citation index.ab. or bids.ab. or cancerlit.ab. or reference list\$.ab. or bibliograph\$.ab. or hand-search\$.ab. or relevant journals.ab. or manual search\$.ab. or ((selection criteria or data extraction).ab. and review/)) not (comment/ or letter/ or editorial/) (342183)
  - 5 3 and 4 (4443)
  - 6 limit 5 to ez="20170101-20200501" (1355)

\*\*\*\*\*



Database: Embase <January 1, 2017 to May 1 2020 >

Search Strategy:

---

| No. | Query                                                                                                                                                                                                                                                                                                                                                                                                                                                                                                                                                                                                                                                                                                                                                                                                                                                                                                                                                                                                                                                                                                                                                                                                                                                                                                                                                                                                    | Results |
|-----|----------------------------------------------------------------------------------------------------------------------------------------------------------------------------------------------------------------------------------------------------------------------------------------------------------------------------------------------------------------------------------------------------------------------------------------------------------------------------------------------------------------------------------------------------------------------------------------------------------------------------------------------------------------------------------------------------------------------------------------------------------------------------------------------------------------------------------------------------------------------------------------------------------------------------------------------------------------------------------------------------------------------------------------------------------------------------------------------------------------------------------------------------------------------------------------------------------------------------------------------------------------------------------------------------------------------------------------------------------------------------------------------------------|---------|
| #13 | #12 AND [1-1-2017]/sd                                                                                                                                                                                                                                                                                                                                                                                                                                                                                                                                                                                                                                                                                                                                                                                                                                                                                                                                                                                                                                                                                                                                                                                                                                                                                                                                                                                    | 4667    |
| #12 | #10 AND #11                                                                                                                                                                                                                                                                                                                                                                                                                                                                                                                                                                                                                                                                                                                                                                                                                                                                                                                                                                                                                                                                                                                                                                                                                                                                                                                                                                                              | 13713   |
|     | ('meta analysis'/exp OR 'systematic review'/exp OR ((meta NEAR/3 analy*):ab,ti) OR metaanaly*:ab,ti OR review*:ti OR overview*:ti OR ((synthes* NEAR/3 (literature* OR research* OR studies OR data)):ab,ti) OR (pooled AND analys*:ab,ti) OR (((data NEAR/2 pool*):ab,ti) AND studies:ab,ti) OR medline:ab,ti OR medlars:ab,ti OR embase:ab,ti OR cinahl:ab,ti OR scisearch:ab,ti OR psychinfo:ab,ti OR psycinfo:ab,ti OR psychlit:ab,ti OR psyclit:ab,ti OR cinhal:ab,ti OR cancerlit:ab,ti OR cochrane:ab,ti OR bids:ab,ti OR pubmed:ab,ti OR ovid:ab,ti OR (((hand OR manual OR database* OR computer*) NEAR/2 search*):ab,ti) OR ((electronic NEAR/2 (database* OR 'data base' OR 'data bases')):ab,ti) OR bibliograph*:ab OR 'relevant journals':ab OR (((review* OR overview*) NEAR/10 (systematic* OR methodologic* OR quantitativ* OR research* OR literature* OR studies OR trial* OR effective*)):ab)) NOT (((retrospective* OR record* OR case* OR patient*) NEAR/2 review*):ab,ti) OR (((patient* OR review*) NEAR/2 chart*):ab,ti) OR rat:ab,ti OR rats:ab,ti OR mouse:ab,ti OR mice:ab,ti OR hamster:ab,ti OR hamsters:ab,ti OR animal:ab,ti OR animals:ab,ti OR dog:ab,ti OR dogs:ab,ti OR cat:ab,ti OR cats:ab,ti OR bovine:ab,ti OR sheep:ab,ti) NOT ('editorial'/exp OR 'erratum'/de OR 'letter'/exp) NOT (('animal'/exp OR 'nonhuman'/exp) NOT (('animal'/exp OR 'nonhuman'/exp) AND |         |
| #11 | 'human'/exp))                                                                                                                                                                                                                                                                                                                                                                                                                                                                                                                                                                                                                                                                                                                                                                                                                                                                                                                                                                                                                                                                                                                                                                                                                                                                                                                                                                                            | 1189009 |
| #10 | #1 OR #2 OR #3 OR #4 OR #5 OR #6 OR #7 OR #8 OR #9                                                                                                                                                                                                                                                                                                                                                                                                                                                                                                                                                                                                                                                                                                                                                                                                                                                                                                                                                                                                                                                                                                                                                                                                                                                                                                                                                       | 279905  |
|     | ((breath* OR respiratory OR pressure OR volume) NEAR/3 support):ti,ab,kw) OR (((face OR nasal OR oronasal OR laryngeal) NEXT/0 (mask\$ OR helmet\$)):ti,ab,kw) OR ((nasal NEAR/2 (cannula\$ OR oxygen OR tube\$)):ti,ab,kw) OR hfnc:ti,ab,kw OR optiflow*:ti,ab,kw OR ((oxygen NEXT/0 inhalat* NEXT/0 therap*):ti,ab,kw) OR 'therapeutic hyperventilation':ti,ab,kw OR bcap:ti,ab,kw OR bcpap:ti,ab,kw OR 'b                                                                                                                                                                                                                                                                                                                                                                                                                                                                                                                                                                                                                                                                                                                                                                                                                                                                                                                                                                                             |         |
| #9  | cpap':ti,ab,kw                                                                                                                                                                                                                                                                                                                                                                                                                                                                                                                                                                                                                                                                                                                                                                                                                                                                                                                                                                                                                                                                                                                                                                                                                                                                                                                                                                                           | 19009   |
|     | ((inspiratory OR intermittent) NEAR/2 (ventilation OR                                                                                                                                                                                                                                                                                                                                                                                                                                                                                                                                                                                                                                                                                                                                                                                                                                                                                                                                                                                                                                                                                                                                                                                                                                                                                                                                                    |         |
| #8  | breathing)):ti,ab,kw                                                                                                                                                                                                                                                                                                                                                                                                                                                                                                                                                                                                                                                                                                                                                                                                                                                                                                                                                                                                                                                                                                                                                                                                                                                                                                                                                                                     | 2167    |
|     | ((respirator NEXT/0 weaning):ti,ab,kw) OR (((positive OR negative) NEXT/0 airway*):ti,ab,kw) OR (((airway* OR positive) NEAR/2 pressure):ti,ab,kw) OR 'respiration-control':ti,ab,kw OR 'volume                                                                                                                                                                                                                                                                                                                                                                                                                                                                                                                                                                                                                                                                                                                                                                                                                                                                                                                                                                                                                                                                                                                                                                                                          |         |
| #7  | control':ti,ab,kw OR 'pressure control*':ti,ab,kw                                                                                                                                                                                                                                                                                                                                                                                                                                                                                                                                                                                                                                                                                                                                                                                                                                                                                                                                                                                                                                                                                                                                                                                                                                                                                                                                                        | 58676   |
|     | pav:ti,ab,kw OR ippv:ti,ab,kw OR niv:ti,ab,kw OR nippv:ti,ab,kw OR                                                                                                                                                                                                                                                                                                                                                                                                                                                                                                                                                                                                                                                                                                                                                                                                                                                                                                                                                                                                                                                                                                                                                                                                                                                                                                                                       |         |
| #6  | nppv:ti,ab,kw OR niav:ti,ab,kw OR nivm:ti,ab,kw OR snimv:ti,ab,kw OR                                                                                                                                                                                                                                                                                                                                                                                                                                                                                                                                                                                                                                                                                                                                                                                                                                                                                                                                                                                                                                                                                                                                                                                                                                                                                                                                     | 28320   |

|    |                                                                                                                                                                                                                                                                                                                                                                                                                                                                                                                                                                                  |        |
|----|----------------------------------------------------------------------------------------------------------------------------------------------------------------------------------------------------------------------------------------------------------------------------------------------------------------------------------------------------------------------------------------------------------------------------------------------------------------------------------------------------------------------------------------------------------------------------------|--------|
|    | npsimv:ti,ab,kw OR aprv:ti,ab,kw OR cpap:ti,ab,kw OR ncpap:ti,ab,kw OR<br>bipap:ti,ab,kw OR ippb:ti,ab,kw                                                                                                                                                                                                                                                                                                                                                                                                                                                                        |        |
| #5 | ((invasive OR noninvasive) NEAR/1 (ventilat* OR respirat*)):ti,ab,kw<br>(('non invasive' NEAR/1 respirat*):ti,ab,kw) OR ((mechanical NEAR/1<br>respirat*):ti,ab,kw) OR ((pulmonary NEAR/1 respirat*):ti,ab,kw) OR<br>((artificial NEAR/1 respirat*):ti,ab,kw) OR (((assisted OR assistance)<br>NEAR/1 respirat*):ti,ab,kw) OR (('proportional assist*' NEAR/1<br>respirat*):ti,ab,kw) OR ((helmet NEAR/1 respirat*):ti,ab,kw) OR ((nasal<br>NEAR/1 respirat*):ti,ab,kw) OR ((pressure NEAR/1 respirat*):ti,ab,kw) OR<br>((volume NEAR/1 respirat*):ti,ab,kw) OR ((cuirass NEAR/1 | 13392  |
| #4 | respirat*):ti,ab,kw) OR ((support NEAR/1 respirat*):ti,ab,kw)<br>(((high frequency' OR interactive OR liquid OR 'liquid assisted' OR<br>fluorocarbon OR 'one lung' OR manual OR 'inverse ratio') NEAR/1<br>(ventilat* OR respirat*)):ti,ab,kw) OR ((lung NEXT/0 seperat* NEXT/0<br>technique\$):ti,ab,kw) OR ((rapid NEXT/0 sequenc* NEXT/0 (intubate* OR<br>induct*)):ti,ab,kw) OR (((endotracheal OR intratracheal) NEXT/0                                                                                                                                                     | 15827  |
| #3 | intubat*):ti,ab,kw)<br>(('non invasive' NEAR/1 ventilat*):ti,ab,kw) OR ((mechanical NEAR/1<br>ventilat*):ti,ab,kw) OR ((pulmonary NEAR/1 ventilat*):ti,ab,kw) OR<br>((artificial NEAR/1 ventilat*):ti,ab,kw) OR (((assisted OR assistance)<br>NEAR/1 ventilat*):ti,ab,kw) OR (('proportional assist*' NEAR/1<br>ventilat*):ti,ab,kw) OR ((helmet NEAR/1 ventilat*):ti,ab,kw) OR ((nasal<br>NEAR/1 ventilat*):ti,ab,kw) OR ((pressure NEAR/1 ventilat*):ti,ab,kw) OR<br>((volume NEAR/1 ventilat*):ti,ab,kw) OR ((cuirass NEAR/1                                                  | 5398   |
| #2 | ventilat*):ti,ab,kw) OR ((support NEAR/1 ventilat*):ti,ab,kw)<br>'artificial ventilation'/exp OR 'mechanical ventilator'/de OR 'negative                                                                                                                                                                                                                                                                                                                                                                                                                                         | 102879 |
| #1 | pressure ventilator'/exp                                                                                                                                                                                                                                                                                                                                                                                                                                                                                                                                                         | 206448 |

**PubMed (January 1, 2017 to May 1, 2020)**

| Search | Query                                                                                                                                                                                                                                                                                                                                                                                                                                                                                                                                                                                                                                                                                                                                                                                                                                                                                                                                                                                                                                                                                                                                                                                                                                                                                                                                                                                                                                                                                                                                                                                                                                                                                                                                                                                                                                                                                                                 | Items found |
|--------|-----------------------------------------------------------------------------------------------------------------------------------------------------------------------------------------------------------------------------------------------------------------------------------------------------------------------------------------------------------------------------------------------------------------------------------------------------------------------------------------------------------------------------------------------------------------------------------------------------------------------------------------------------------------------------------------------------------------------------------------------------------------------------------------------------------------------------------------------------------------------------------------------------------------------------------------------------------------------------------------------------------------------------------------------------------------------------------------------------------------------------------------------------------------------------------------------------------------------------------------------------------------------------------------------------------------------------------------------------------------------------------------------------------------------------------------------------------------------------------------------------------------------------------------------------------------------------------------------------------------------------------------------------------------------------------------------------------------------------------------------------------------------------------------------------------------------------------------------------------------------------------------------------------------------|-------------|
| #3     | <p>Search (#1 AND #2) AND 2017/01:2020/05 [crdt]<br/>           Search (systematic[sb] OR meta-analysis[pt] OR meta-analysis as topic[mh] OR meta-analysis[mh] OR meta analy*[tw] OR metanaly*[tw] OR metaanaly*[tw] OR met analy*[tw] OR integrative research[tiab] OR integrative review*[tiab] OR integrative overview*[tiab] OR research integration*[tiab] OR research overview*[tiab] OR collaborative review*[tiab] OR collaborative overview*[tiab] OR systematic review*[tiab] OR technology assessment*[tiab] OR technology overview*[tiab] OR "Technology Assessment, Biomedical"[mh] OR HTA[tiab] OR HTAs[tiab] OR comparative efficacy[tiab] OR comparative effectiveness[tiab] OR outcomes research[tiab] OR indirect comparison*[tiab] OR ((indirect treatment[tiab] OR mixed-treatment[tiab]) AND comparison*[tiab]) OR Embase*[tiab] OR Cinahl*[tiab] OR systematic overview*[tiab] OR methodological overview*[tiab] OR methodologic overview*[tiab] OR methodological review*[tiab] OR methodologic review*[tiab] OR quantitative review*[tiab] OR quantitative overview*[tiab] OR quantitative syntheses*[tiab] OR pooled analy*[tiab] OR Cochrane[tiab] OR Medline[tiab] OR Pubmed[tiab] OR Medlars[tiab] OR handsearch*[tiab] OR hand search*[tiab] OR meta-regression*[tiab] OR metaregression*[tiab] OR data syntheses*[tiab] OR data extraction[tiab] OR data abstraction*[tiab] OR mantel haenszel[tiab] OR peto[tiab] OR der-simonian[tiab] OR dersimonian[tiab] OR fixed effect*[tiab] OR "Cochrane Database Syst Rev"[Journal: __jrid21711] OR "health technology assessment winchester, england"[Journal] OR "Evid Rep Technol Assess (Full Rep)"[Journal] OR "Evid Rep Technol Assess (Summ)"[Journal] OR "Int J Technol Assess Health Care"[Journal] OR "GMS Health Technol Assess"[Journal] OR "Health Technol Assess (Rockv)"[Journal] OR "Health Technol Assess Rep"[Journal])</p> | 1229        |
| #2     | <p>Search (assistance in ventilat*[tw] OR Ventilation assistance*[tw] OR assistance in ventilation[tw] OR cuirass ventilat*[tw] OR cuirass respirat*[tw] OR non-invasive ventilat*[tw] OR invasive ventilation*[tw] OR noninvasive ventilat*[tw] OR non-invasive respirat*[tw] OR noninvasive respirat*[tw] OR Mechanical ventilat*[tw] OR Mechanical respirat*[tw] OR pulmonary ventilat*[tw] OR pulmonary respirat*[tw] OR artificial ventilat*[tw] OR artificial respirat*[tw] OR assisted ventilat*[tw] OR assisted respirat*[tw] OR proportional-assisted ventilat*[tw] OR proportional-assisted respirat*[tw] OR proportion-assisted ventilat*[tw] OR proportion-assisted respirat*[tw] OR helmet-based respirat*[tw] OR helmet-based ventilat*[tw] OR nasal ventilat*[tw] OR nasal respirat*[tw] OR pressure-based respirat*[tw] OR pressure-based ventilat*[tw] OR pressure respirat*[tw] OR pressure ventilat*[tw] OR volume ventilat*[tw] OR volume respirat*[tw] OR respirator weaning*[tw] OR respirators weaning*[tw] OR</p>                                                                                                                                                                                                                                                                                                                                                                                                                                                                                                                                                                                                                                                                                                                                                                                                                                                                             | 427097      |
| #1     | <p>Search (assistance in ventilat*[tw] OR Ventilation assistance*[tw] OR assistance in ventilation[tw] OR cuirass ventilat*[tw] OR cuirass respirat*[tw] OR non-invasive ventilat*[tw] OR invasive ventilation*[tw] OR noninvasive ventilat*[tw] OR non-invasive respirat*[tw] OR noninvasive respirat*[tw] OR Mechanical ventilat*[tw] OR Mechanical respirat*[tw] OR pulmonary ventilat*[tw] OR pulmonary respirat*[tw] OR artificial ventilat*[tw] OR artificial respirat*[tw] OR assisted ventilat*[tw] OR assisted respirat*[tw] OR proportional-assisted ventilat*[tw] OR proportional-assisted respirat*[tw] OR proportion-assisted ventilat*[tw] OR proportion-assisted respirat*[tw] OR helmet-based respirat*[tw] OR helmet-based ventilat*[tw] OR nasal ventilat*[tw] OR nasal respirat*[tw] OR pressure-based respirat*[tw] OR pressure-based ventilat*[tw] OR pressure respirat*[tw] OR pressure ventilat*[tw] OR volume ventilat*[tw] OR volume respirat*[tw] OR respirator weaning*[tw] OR respirators weaning*[tw] OR</p>                                                                                                                                                                                                                                                                                                                                                                                                                                                                                                                                                                                                                                                                                                                                                                                                                                                                             | 212679      |

positive airway\*[tw] OR negative airway\*[tw] OR airway pressure\*[tw] OR positive pressure\*[tw] OR volume-control\*[tw] OR pressure-control\*[tw] OR BiPAP[tw] OR ippb[tw] OR inspiratory breathing\*[tw] OR inspiratory ventilation\*[tw] OR intermittent ventilation\*[tw] OR intermittent breathing\*[tw] OR IPPV[tw] OR NIV[tw] OR NIPPV[tw] OR NPPV[tw] OR NIAV[tw] OR NIVM[tw] OR SNIMV[tw] OR NPSIMV[tw] OR Aprv[tw] OR cpap[tw] OR ncpap[tw] OR PAV[tw] OR breathing support\*[tw] OR respiratory support\*[tw] OR pressure support\*[tw] OR BCAP[tw] OR bCPAP[tw] OR B-CPAP[tw] OR volume support\*[tw] OR oxygen inhalation therap\*[tw] OR Nasal cannula\*[tw] OR Nasal tube\*[tw] OR Oronasal mask\*[tw] OR Optiflow\*[tw] OR HFNC[tw] OR High Flow Nasal Oxygen Therap\*[tw] OR Nasal high flow oxygen\*[tw] OR high-frequency oscillation ventilat\* [tw] OR high frequency ventilat\*[tw] OR High-Frequency Jet Ventilator\*[tw] OR Interactive Ventilatory Support\*[tw] OR Liquid Ventilator\*[tw] OR Liquid -assisted ventilator\*[tw] OR fluorocarbon ventilator\*[tw] OR One-Lung Ventilator\*[tw] OR Lung separation technique\*[tw] OR Laryngeal Mask\*[tw] OR Rapid sequence induc\*[tw] OR Rapid sequence intubat\*[tw] OR Intratracheal intubat\*[tw] OR endotracheal intubat\*[tw] OR manual ventilator\*[tw] OR inverse-ratio ventilator\*[tw] OR respiration control\*[tw] OR therapeutic hyperventilate\*[tw] OR "Respiration, Artificial"[Mesh] OR "Ventilators, Mechanical"[Mesh:NoExp] OR "Cannula"[Mesh:NoExp] OR "Oxygen Inhalation Therapy"[Mesh:NoExp] OR "Intubation, Intratracheal"[Mesh])

## Cochrane Library (January 1, 2017 to May 1, 2020)

| ID | Search Hits                                                                                                                                                                                                                                                                                                                                                                                                                                                                                                                                                                                                                                                                                                                                                                                                                                                                                                                                                                                                                                                                                                                                                                                                                                                            |
|----|------------------------------------------------------------------------------------------------------------------------------------------------------------------------------------------------------------------------------------------------------------------------------------------------------------------------------------------------------------------------------------------------------------------------------------------------------------------------------------------------------------------------------------------------------------------------------------------------------------------------------------------------------------------------------------------------------------------------------------------------------------------------------------------------------------------------------------------------------------------------------------------------------------------------------------------------------------------------------------------------------------------------------------------------------------------------------------------------------------------------------------------------------------------------------------------------------------------------------------------------------------------------|
| #1 | MeSH descriptor: [Respiration, Artificial] explode all trees 6021                                                                                                                                                                                                                                                                                                                                                                                                                                                                                                                                                                                                                                                                                                                                                                                                                                                                                                                                                                                                                                                                                                                                                                                                      |
| #2 | MeSH descriptor: [Cannula] this term only 71                                                                                                                                                                                                                                                                                                                                                                                                                                                                                                                                                                                                                                                                                                                                                                                                                                                                                                                                                                                                                                                                                                                                                                                                                           |
| #3 | MeSH descriptor: [Oxygen Inhalation Therapy] this term only 1123                                                                                                                                                                                                                                                                                                                                                                                                                                                                                                                                                                                                                                                                                                                                                                                                                                                                                                                                                                                                                                                                                                                                                                                                       |
| #4 | MeSH descriptor: [Intubation, Intratracheal] explode all trees 4308                                                                                                                                                                                                                                                                                                                                                                                                                                                                                                                                                                                                                                                                                                                                                                                                                                                                                                                                                                                                                                                                                                                                                                                                    |
| #5 | MeSH descriptor: [Ventilators, Mechanical] explode all trees 264                                                                                                                                                                                                                                                                                                                                                                                                                                                                                                                                                                                                                                                                                                                                                                                                                                                                                                                                                                                                                                                                                                                                                                                                       |
| #6 | (((invasive or non-invasive or noninvasive or Mechanical or pulmonary or artificial or assisted or assistance or (proportion* NEXT assist*) or helmet or nasal or pressure or volume or cuirass or support or High-Frequency or interactive or liquid or liquid-assisted or fluorocarbon or One-Lung or manual or (inverse NEXT ratio)) NEAR/1 (ventilat* or respirat*)) or (lung NEXT separat* NEXT technique?) or (rapid NEXT sequenc* NEXT (intubate* or induct*)) or ((endotracheal or Intratracheal) NEXT intubat*) or (respirator NEXT weaning) or ((positive or negative) NEXT airway*) or ((airway* or positive) NEAR/2 pressure) or ((respirat* or volume or pressure) NEXT control*) or BiPAP or ippb or ((inspiratory or intermittent) NEAR/2 (ventilation or breathing)) or ippv or NIV or NIPPV or NPPV or NIAV or NIVM or SNIMV or NPSIMV or Aprv or cpap or ncpap or PAV or BCAP or bCPAP or B-CPAP or ((breath* or respiratory or pressure or volume) NEAR/3 support) or ((face or nasal or oronasal or Laryngeal) NEXT (mask? or helmet?)) or (oxygen NEXT inhalat* NEXT therap*) or (nasal NEAR/2 (cannula? or oxygen or tube?)) or HFNC or optiflow* or (oxygen NEXT inhalat* NEXT therap*) or (therapeutic NEXT hyperventilation))):ti,ab,kw 38229 |
| #7 | #1 OR #2 OR #3 OR #4 OR #5 OR #6 with Cochrane Library publication date Between Jan 2017 and May 2020, in Cochrane Reviews 117                                                                                                                                                                                                                                                                                                                                                                                                                                                                                                                                                                                                                                                                                                                                                                                                                                                                                                                                                                                                                                                                                                                                         |

**CINAHL (January 1, 2017 to May 1, 2020)**

|    |                                                                                                                                                                                                                                                                                                                                                                                                                                                                                                                                                                                                                                                                                                    |                                                                                                                                                  |                                                                                                                                         |         |
|----|----------------------------------------------------------------------------------------------------------------------------------------------------------------------------------------------------------------------------------------------------------------------------------------------------------------------------------------------------------------------------------------------------------------------------------------------------------------------------------------------------------------------------------------------------------------------------------------------------------------------------------------------------------------------------------------------------|--------------------------------------------------------------------------------------------------------------------------------------------------|-----------------------------------------------------------------------------------------------------------------------------------------|---------|
| S3 | S1 AND S2                                                                                                                                                                                                                                                                                                                                                                                                                                                                                                                                                                                                                                                                                          | <p>Limiters - Published<br/>Date: 20170101-<br/>20200531<br/>Expanders - Apply<br/>equivalent subjects<br/>Search modes -<br/>Boolean/Phrase</p> | <p>Interface -<br/>EBSCOhost<br/>Research<br/>Databases<br/>Search Screen -<br/>Basic Search<br/>Database -<br/>CINAHL<br/>Complete</p> | 772     |
| S2 | <p>(MH "Meta Analysis") OR TI meta analys* OR AB meta analys* OR TI<br/>Metaanaly* OR AB metaanalys* OR (MH "Literature Review+") OR TI<br/>systematic review* OR AB systematic review* OR TI systematic overview*<br/>OR AB systematic overview* NOT (PT commentary OR PT letter OR PT<br/>editorial OR MH animals+)</p>                                                                                                                                                                                                                                                                                                                                                                          | <p>Expanders - Apply<br/>equivalent subjects<br/>Search modes -<br/>Boolean/Phrase</p>                                                           | <p>Interface -<br/>EBSCOhost<br/>Research<br/>Databases<br/>Search Screen -<br/>Basic Search<br/>Database -<br/>CINAHL<br/>Complete</p> | 187,909 |
| S1 | <p>TI ( ((invasive OR non-invasive OR noninvasive OR invasive OR Mechanical OR<br/>pulmonary OR artificial OR assisted OR assistance OR (proportion* W0<br/>assist*) OR helmet OR nasal OR pressure OR volume or cuirass OR support<br/>OR High-Frequency OR interactive OR liquid OR liquid-assisted OR<br/>fluorocarbon OR One-Lung OR manual OR (inverse W0 ratio)) N1 (ventilat*<br/>or respirat*)) OR (lung W0 seperat* W0 technique#) OR (rapid W0 sequenc*<br/>W0 (intubate* OR induct*)) or ((endotracheal OR Intratracheal) W0<br/>intubat*) OR (respirator W0 weaning) OR ((positive OR negative) W0<br/>airway*) OR ((airway* OR positive) N2 pressure) OR ((respirat* or volume or</p> | <p>Expanders - Apply<br/>equivalent subjects<br/>Se</p>                                                                                          |                                                                                                                                         | 76,695  |

pressure) W0 control\*) OR BiPAP OR ippb OR ((inspiratory OR intermittent) N2 (ventilation OR breathing)) OR ippv OR NIV OR NIPPV OR NPPV OR NIAV OR NIVM OR SNIMV OR NPSIMV OR Aprv OR cpap OR bCPAP OR B-CPAP OR BCAP OR ncpap OR PAV OR ((breath\* OR respiratory OR pressure OR volume) N3 support) OR ((face OR nasal OR oronasal OR Laryngeal) W0 (mask# or helmet#)) OR (oxygen W0 inhalat\* W0 therap\*) OR (nasal N2 (cannula# OR oxygen OR tube#)) OR HFNC OR optiflow\* OR (oxygen W0 inhalat\* W0 therap\*) OR (therapeutic W0 hyperventilation)) ) OR AB ( ((invasive OR non-invasive OR noninvasive OR Mechanical OR pulmonary OR artificial OR assisted OR assistance OR (proportion\* W0 assist\*) OR helmet OR nasal OR pressure OR volume or cuirass OR support OR High-Frequency OR interactive OR liquid OR liquid-assisted OR fluorocarbon OR One-Lung OR manual OR (inverse W0 ratio)) N1 (ventilat\* or respirat\*)) OR (lung W0 seperat\* W0 technique#) OR (rapid W0 sequenc\* W0 (intubate\* OR induct\*)) or ((endotracheal OR Intratracheal) W0 intubat\*) OR (respirator W0 weaning) OR ((positive OR negative) W0 airway\*) OR ((airway\* OR positive) N2 pressure) OR ((respirat\* or volume or pressure) W0 control\*) OR BiPAP OR ippb OR ((inspiratory OR intermittent) N2 (ventilation OR breathing)) OR ippv OR NIV OR NIPPV OR NPPV OR NIAV OR NIVM OR SNIMV OR NPSIMV OR Aprv OR cpap OR bCPAP OR B-CPAP OR BCAP OR ncpap OR PAV OR ((breath\* OR respiratory OR pressure OR volume) N3 support) OR ((face OR nasal OR oronasal OR Laryngeal) W0 (mask# or helmet#)) OR (oxygen W0 inhalat\* W0 therap\*) OR (nasal N2 (cannula# OR oxygen OR tube#)) OR HFNC OR optiflow\* OR (oxygen W0 inhalat\* W0 therap\*) OR (therapeutic W0 hyperventilation)) ) OR MW ( ((invasive OR non-invasive OR noninvasive OR Mechanical OR pulmonary OR artificial OR assisted OR assistance OR (proportion\* W0 assist\*) OR helmet OR nasal OR pressure OR volume or cuirass OR support OR High-Frequency OR interactive OR liquid OR liquid-assisted OR fluorocarbon OR One-Lung OR manual OR (inverse W0 ratio)) N1 (ventilat\* or respirat\*)) OR (lung W0 seperat\* W0 technique#) OR (rapid W0 sequenc\* W0 (intubate\* OR induct\*)) or ((endotracheal OR

Intratracheal) W0 intubat\*) OR (respirator W0 weaning) OR ((positive OR negative) W0 airway\*) OR ((airway\* OR positive) N2 pressure) OR ((respirat\* or volume or pressure) W0 control\*) OR BiPAP OR ippb OR ((inspiratory OR intermittent) N2 (ventilation OR breathing)) OR ippv OR NIV OR NIPPV OR NPPV OR NIAV OR NIVM OR SNIMV OR NPSIMV OR Aprv OR cpap OR bCPAP OR B-CPAP OR BCAP OR ncpap OR PAV OR ((breath\* OR respiratory OR pressure OR volume) N3 support) OR ((face OR nasal OR oronasal OR Laryngeal) W0 (mask# or helmet#)) OR (oxygen W0 inhalat\* W0 therap\*) OR (nasal N2 (cannula# OR oxygen OR tube#)) OR HFNC OR optiflow\* OR (oxygen W0 inhalat\* W0 therap\*) OR (therapeutic W0 hyperventilation)) ) OR (MH "Respiration, Artificial+") OR (MH "Ventilators, Mechanical") OR (MH "Mechanical Ventilation (Iowa NIC)") OR (MH "Ventilation Assistance (Iowa NIC)") OR (MH "Respiratory Therapy Equipment and Supplies+") OR (MH "Intubation, Intratracheal")



## Supplement. Stream 3 search strategy

Database: Ovid MEDLINE(R) and Epub Ahead of Print, In-Process & Other Non-Indexed Citations and Daily <1946 to May 1, 2020>

Search Strategy:

- 
- 1 SARS virus/ or severe acute respiratory syndrome/ or ((severe adj acute adj respiratory adj (infection or syndrome)) or SARs or SARI or Sars-cov or ((sars-associated or sars-related) adj (cov or coronavirus))).mp. (14511)
  - 2 Middle East Respiratory Syndrome Coronavirus/ or Middle East Respiratory Syndrome/ or (Mers or (middle adj east adj respiratory adj syndrome) or (middle adj east adj respiratory adj syndrome adj (associated or related) adj (coronavirus or Cov)) or Mers-Cov or ((Mers-related or mers-associated) adj (coronavirus or cov))).mp. (9622)
  - 3 ("2019" adj (novel or new) adj corona\*) or ("2019" adj (CoV or nCoV)) or (coronavirus adj (disease adj "2019")) or COVID19 or COVID-19 or ((Novel or New) adj Corona\*) or SARS2 or SARS-CoV-2 or (SARS adj2 (coronaviridae or coronavirus)) or ((sars or Coronavirus) adj "2") or nCov or 2019ncov).mp. (11126)
  - 4 1 or 2 or 3 (26211)
  - 5 (fomite? or ((cross or health\* or nosocomial or hospital? or lab or labs or laborator\*) adj3 (infection? or pneumonia?)) or (infection\* adj control) or ((destr\* or preven\*) adj4 (pathogen? or germ?))).mp. (116629)
  - 6 Fomites/ or Infectious Disease Transmission, Patient-to-Professional/ or Disease Transmission, Infectious/ or Equipment Contamination/ or Equipment Contamination/ or Laboratory Infection/ or Infection Control/ or (Laboratories/ and (exp Occupational exposure/ or occupational diseases/)) or exp Aerosols/ (77007)
  - 7 ((equipment\* or utensil? or clothing or pipet\* or droplet\* or Aerosol\* or cough\* or communicable or autochthonous or horizontal or pathogen\* or disease\* or virus\* or air-borne or air-microbiology) adj4 (spread\* or transmi\* or induc\* or stimulat\* or genrat\* or contamina\* or (infect\* adj5 (ventilat\* or respirat\*)) or dispers\*))).mp. (261400)
  - 8 5 or 6 or 7 (394437)
  - 9 4 and 8 (3949)

\*\*\*\*\*

Database: Embase <1974 to 2020 May 01>

Search Strategy:

---

| No | Query                                                                                 | Results |
|----|---------------------------------------------------------------------------------------|---------|
| #1 |                                                                                       |         |
| 3  | #5 AND #12                                                                            | 5379    |
| #1 |                                                                                       |         |
| 2  | #6 OR #7 OR #10 OR #11                                                                | 504508  |
| #1 | fomite\$:ti,ab,kw OR (((cross OR health* OR nosocomial OR hospital\$ OR lab OR labs   |         |
| 1  | OR laborator*) NEAR/2 (infection\$ OR pneumonia\$)):ti,ab,kw) OR ((infection* NEXT/0  |         |
| #1 | control):ti,ab,kw) OR (((destr* OR preven*) NEAR/3 (pathogen\$ OR germ\$)):ti,ab,kw)  | 63041   |
| 0  | #8 AND #9                                                                             | 1304    |
| #9 | equipment*:ti,ab,kw OR utensil\$:ti,ab,kw OR clothing:ti,ab,kw OR pipet*:ti,ab,kw OR  |         |
| #8 | droplet*:ti,ab,kw OR aerosol*:ti,ab,kw OR cough*:ti,ab,kw OR communicable:ti,ab,kw    |         |
| #7 | OR autochthonous:ti,ab,kw OR horizontal:ti,ab,kw OR pathogen*:ti,ab,kw OR             |         |
| #6 | disease*:ti,ab,kw OR virus*:ti,ab,kw OR 'air borne':ti,ab,kw OR 'air                  | 688334  |
| #5 | microbiology':ti,ab,kw                                                                | 5       |
| #4 | (infect* NEAR/4 (respirat* OR ventilat*)):ti,ab,kw                                    | 83988   |
| #3 | ((equipment* OR utensil\$ OR clothing OR pipet* OR droplet* OR aerosol* OR cough*     |         |
| #2 | OR communicable OR autochthonous OR horizontal OR pathogen* OR disease* OR            |         |
| #1 | virus* OR 'air borne' OR 'air microbiology') NEAR/3 (spread* OR transmi* OR induc*    |         |
|    | OR stimulat* OR genrat* OR contamina* OR dispers*)):ti,ab,kw                          | 191893  |
|    | 'fomite'/de OR 'disease transmission'/de OR 'medical device contamination'/de OR      |         |
|    | 'laboratory infection'/de OR 'infection control'/de OR ('laboratory'/exp AND          |         |
|    | ('occupational exposure'/exp OR 'occupational disease'/de)) OR 'aerosol'/de           | 236821  |
|    | #1 OR #2 OR #3 OR #4                                                                  | 24228   |
|    | 'covid-19':ti,ab,kw OR covid19:ti,ab,kw OR ((2019 NEXT/0 (novel OR new) NEXT/0        |         |
|    | corona*):ti,ab,kw)                                                                    | 4968    |
|    | ((2019 NEXT/0 (cov OR ncov)):ti,ab,kw) OR ((coronavirus NEXT/0 'disease               |         |
|    | 2019'):ti,ab,kw) OR (((novel OR new) NEXT/0 corona*):ti,ab,kw) OR sars2:ti,ab,kw OR   |         |
|    | 'sars cov 2':ti,ab,kw OR ncov:ti,ab,kw OR 2019ncov:ti,ab,kw                           | 1974    |
|    | 'middle east respiratory syndrome'/de OR 'middle east respiratory syndrome            |         |
|    | coronavirus'/de OR mers:ti,ab,kw OR ((middle NEXT/0 east NEXT/0 respiratory           |         |
|    | NEXT/0 syndrome):ti,ab,kw) OR ((middle NEXT/0 east NEXT/0 respiratory NEXT/0          |         |
|    | syndrome NEXT/0 (associated OR related) NEXT/0 (coronavirus OR cov)):ti,ab,kw) OR     |         |
|    | 'mers cov':ti,ab,kw OR ((('mers related' OR 'mers associated') NEXT/0 (coronavirus OR |         |
|    | cov)):ti,ab,kw)                                                                       | 5417    |
|    | 'severe acute respiratory syndrome'/de OR 'sars-related coronavirus'/de OR ((severe   |         |
|    | NEXT/0 acute NEXT/0 respiratory NEXT/0 (infection OR syndrome)):ti,ab,kw) OR          |         |
|    | sars:ti,ab,kw OR sari:ti,ab,kw OR 'sars cov':ti,ab,kw OR (((sars associated' OR 'sars |         |
|    | related') NEXT/0 (cov OR coronavirus)):ti,ab,kw)                                      | 16184   |

**PubMed (inception to May 1, 2020)**

| Search | Query                                                                                                                                                                                                                                                                                                                                                                                                                                                                                                                                                                                                                                                                                                                                                                                                                                                                                                                                                                                                                                                                                                                                                                                                                                                                                                                                                                                                               | Items found |
|--------|---------------------------------------------------------------------------------------------------------------------------------------------------------------------------------------------------------------------------------------------------------------------------------------------------------------------------------------------------------------------------------------------------------------------------------------------------------------------------------------------------------------------------------------------------------------------------------------------------------------------------------------------------------------------------------------------------------------------------------------------------------------------------------------------------------------------------------------------------------------------------------------------------------------------------------------------------------------------------------------------------------------------------------------------------------------------------------------------------------------------------------------------------------------------------------------------------------------------------------------------------------------------------------------------------------------------------------------------------------------------------------------------------------------------|-------------|
| #7     | Search (#1 OR #2 OR #3) AND (#4 OR #5 OR #6)<br>Search equipment contaminat*[tw] OR contaminated equipment*[tw] OR utensil contaminat*[tw] OR utensils contaminat*[tw] OR contaminated utensil*[tw] OR clothing contaminat*[tw] OR contaminated cloth*[tw] OR Droplet spread*[tw] OR Droplets spread*[tw] OR Aerosol spread*[tw] OR Aerosols spread*[tw] OR Droplet generat*[tw] OR Droplets generat*[tw] OR Aerosol generat*[tw] OR Aerosols generat*[tw] OR Droplet dispers*[tw] OR Droplets dispers*[tw] OR Aerosol dispers*[tw] OR Aerosols dispers*[tw] OR Communicable contamina*[tw] OR autochthonous contamina*[tw] OR horizontal contamina*[tw] OR pathogen contamina*[tw] OR disease contamina*[tw] OR air-borne contamina*[tw] OR virus contamina*[tw] OR air-microbiology contamina*[tw] OR Communicable transmi*[tw] OR autochthonous transmi*[tw] OR horizontal transmi*[tw] OR pathogen transmi*[tw] OR disease transmi*[tw] OR air-borne transmi*[tw] OR virus transmi*[tw] OR air-microbiology transmi*[tw] OR pathogen induc*[tw] OR disease induc*[tw] OR air-borne induc*[tw] OR virus induc*[tw] OR air-microbiology induc*[tw] OR pathogen generat*[tw] OR disease generat*[tw] OR air-borne generat*[tw] OR virus generat*[tw] OR air-microbiology generat*[tw] OR pathogen spread*[tw] OR disease spread*[tw] OR air-borne spread*[tw] OR virus spread*[tw] OR air-microbiology spread*[tw] | 4724        |
| #6     | Search fomite*[tw] OR cross infection*[tw] OR health infection*[tw] OR healthcare infection*[tw] OR nosocomial infection*[tw] OR hospital infection*[tw] OR lab infection*[tw] OR labs infection*[tw] OR labORatORy infection*[tw] OR labORatORies infection*[tw] OR cross pneumonia*[tw] OR health pneumonia*[tw] OR healthcare pneumonia*[tw] OR nosocomial pneumonia*[tw] OR hospital pneumonia*[tw] OR lab pneumonia*[tw] OR labs pneumonia*[tw] OR labORatORy pneumonia*[tw] OR labORatORies pneumonia*[tw] OR infection control*[tw] OR destroying pathogen*[tw] OR preventing pathogen*[tw] OR destruction of pathogen*[tw] OR prevention from pathogen*[tw] OR destroying germ*[tw] OR preventing germ*[tw] OR destruction of germ*[tw] OR prevention from germ*[tw]                                                                                                                                                                                                                                                                                                                                                                                                                                                                                                                                                                                                                                        | 101850      |
| #5     | Search "Fomites"[Mesh:noexp] or "Infectious Disease Transmission, Patient-to-Professional"[Mesh:noexp] or "Disease Transmission, Infectious"[Mesh:noexp] or "Equipment Contamination"[Mesh:noexp] or "Equipment Contamination"[Mesh:noexp] or "Laboratory Infection"[Mesh:noexp] or "Infection Control"[Mesh:noexp] or ("Laboratories"[Mesh:noexp] AND ("Occupational exposure"[Mesh:noexp] OR "Occupational diseases"[Mesh:noexp])) OR "Aerosols"[Mesh]                                                                                                                                                                                                                                                                                                                                                                                                                                                                                                                                                                                                                                                                                                                                                                                                                                                                                                                                                            | 245974      |
| #4     | Search (((2019-novel-corona*[tw] OR 2019-new-corona*[tw] OR novel-corona*[tw] OR new-corona*[tw] OR 2019-Cov[tw] OR 2019-nCov[tw] OR                                                                                                                                                                                                                                                                                                                                                                                                                                                                                                                                                                                                                                                                                                                                                                                                                                                                                                                                                                                                                                                                                                                                                                                                                                                                                | 76984       |
| #3     |                                                                                                                                                                                                                                                                                                                                                                                                                                                                                                                                                                                                                                                                                                                                                                                                                                                                                                                                                                                                                                                                                                                                                                                                                                                                                                                                                                                                                     | 9410        |

nCov[tw] OR coronavirus disease-2019[tw] OR SARS2[tw] OR SARS-2[tw] OR SARS-CoV-2[tw] OR sars cORona\*[tw] OR CORonavirus-2[tw] OR 2019ncov[tw])) OR ((cORonaviridae[Mesh:noexp] OR "CORonaviridae Infections"[Mesh:noexp] OR cORonavirus[Mesh] OR "CORonavirus Infections"[Mesh:noexp] OR BetacORonavirus[Mesh:noexp] OR ((pneumonia[Mesh:noexp] OR "pneumonia, viral"[Mesh:noexp] OR exp Viruses[Mesh]) AND ("Disease Outbreaks"[Mesh] OR Epidemiology[Mesh] OR Epidemiology [Mesh subject heading])) OR BetacORonavirus[tw] OR Beta-cORonavirus[tw] OR CORonavirus\*[tw] OR COVID[tw]) AND 2019/11:2020/05[crdt])

- #2 Search "Middle East Respiratory Syndrome Coronavirus"[Mesh:noexp] OR "Middle East Respiratory Syndrome"[Mesh:noexp] OR Mers[tw] OR middle east respiratORy syndrome\*[tw] OR Mers-Cov[tw] OR Mers-related coronavirus[tw] OR Mers-related cov[tw] OR Mers-associated coronavirus[tw] OR Mers-associated cov[tw] 4704
- #1 Search "sars virus"[MeSH:noexp] OR severe acute respiratory syndrome\*[tw] OR severe acute respirator\*[TW] OR SARs[TW] OR SARI[TW] OR Sars-cov[TW] OR sars-associated cov\*[TW] OR sars-associated coronavirus\*[TW] OR sars-related cov\*[TW] OR sars-related coronavirus\*[TW] 15733

## Cochrane Library (inception to May 1, 2020)

| ID  | Search Hits                                                                                                                                                                                                                                                       |
|-----|-------------------------------------------------------------------------------------------------------------------------------------------------------------------------------------------------------------------------------------------------------------------|
| #1  | MeSH descriptor: [SARS Virus] this term only 9                                                                                                                                                                                                                    |
| #2  | MeSH descriptor: [Severe Acute Respiratory Syndrome] this term only 107                                                                                                                                                                                           |
| #3  | ((severe NEXT acute NEXT respiratory NEXT (infection or syndrome)) or SARs or SARI or Sars-cov or ((sars-associated or sars-related) NEXT (cov or coronavirus))):ti,ab,kw 455                                                                                     |
| #4  | MeSH descriptor: [Middle East Respiratory Syndrome Coronavirus] this term only1                                                                                                                                                                                   |
| #5  | MeSH descriptor: [Coronavirus Infections] this term only 137                                                                                                                                                                                                      |
| #6  | ((Mers or (middle NEXT east NEXT respiratory NEXT syndrome) or (middle NEXT east NEXT respiratory NEXT syndrome NEXT (associated or related) NEXT (coronavirus or Cov)) or Mers-Cov or ((Mers-related or mers-associated) NEXT (coronavirus or cov))):ti,ab,kw 53 |
| #7  | (2019 NEXT (novel or new) NEXT corona*) 21                                                                                                                                                                                                                        |
| #8  | ("2019" NEXT (CoV or nCoV)):ti,ab,kw 3                                                                                                                                                                                                                            |
| #9  | ((coronavirus NEXT disease NEXT 2019)):ti,ab,kw 21                                                                                                                                                                                                                |
| #10 | (COVID19 or COVID-19 or ((Novel or New) NEXT Corona*) or SARS2 or SARS-CoV-2):ti,ab,kw 401                                                                                                                                                                        |
| #11 | ((SARS NEAR/1 (coronaviridae or coronavirus)) or ((sars or Coronavirus) NEXT 2)):ti,ab,kw 44                                                                                                                                                                      |
| #12 | nCov:ti,ab,kw or 2019ncov:ti,ab,kw 34                                                                                                                                                                                                                             |
| #13 | #1 OR #2 OR #3 OR #4 OR #5 OR #6 OR #7 OR #8 OR #9 OR #10 OR #11 OR #12 729                                                                                                                                                                                       |
| #14 | MeSH descriptor: [Fomites] this term only 9                                                                                                                                                                                                                       |
| #15 | MeSH descriptor: [Infectious Disease Transmission, Patient-to-Professional] this term only 59                                                                                                                                                                     |
| #16 | MeSH descriptor: [Disease Transmission, Infectious] this term only107                                                                                                                                                                                             |
| #17 | MeSH descriptor: [Equipment Contamination] this term only 372                                                                                                                                                                                                     |
| #18 | MeSH descriptor: [Laboratory Infection] this term only 2                                                                                                                                                                                                          |
| #19 | MeSH descriptor: [Infection Control] this term only 528                                                                                                                                                                                                           |
| #20 | #14 OR #15 OR #16 OR #17 OR #18 OR #19 1004                                                                                                                                                                                                                       |
| #21 | MeSH descriptor: [Laboratories, Dental] this term only 16                                                                                                                                                                                                         |
| #22 | MeSH descriptor: [Occupational Exposure] explode all trees 550                                                                                                                                                                                                    |
| #23 | MeSH descriptor: [Occupational Diseases] this term only 854                                                                                                                                                                                                       |
| #24 | #22 OR #23 1317                                                                                                                                                                                                                                                   |
| #25 | #21 AND #24 2                                                                                                                                                                                                                                                     |
| #26 | MeSH descriptor: [Aerosols] explode all trees 2348                                                                                                                                                                                                                |
| #27 | #20 OR #25 OR #26 3347                                                                                                                                                                                                                                            |
| #28 | ((fomite? or ((cross or health* or nosocomial or hospital? or lab or labs or laborator*) NEAR/2 (infection? or pneumonia?)) or (infection* NEXT control) or ((destr* or preven*) NEAR/3 (pathogen? or germ?))):ti,ab,kw 5411                                      |
| #29 | ((equipment* or utensil? or clothing or pipet* or droplet* or Aerosol* or cough* or communicable or autochthonous or horizontal or pathogen* or disease* or virus* or air-borne                                                                                   |

or air-microbiology) NEAR/3 (spread\* or transmi\* or induc\* or stimulat\* or genrat\* or  
contamina\* or (infect\* NEAR/4 (ventilat\* or respirat\*)) or dispers\*)):ti,ab,kw 13202

#30 #27 OR #28 OR #29 20396

#31 #13 AND #30 65

**CINAHL (inception to May 1, 2020)**

| #   | Query                                                                                                                                                                                                                                                                                                                               | Limiters/Expanders                                                     | Last Run Via                                                                                              | Results |
|-----|-------------------------------------------------------------------------------------------------------------------------------------------------------------------------------------------------------------------------------------------------------------------------------------------------------------------------------------|------------------------------------------------------------------------|-----------------------------------------------------------------------------------------------------------|---------|
| S10 | S5 AND S9                                                                                                                                                                                                                                                                                                                           | Expanders - Apply equivalent subjects<br>Search modes - Boolean/Phrase | Interface - EBSCOhost Research Databases<br>Search Screen - Advanced Search<br>Database - CINAHL Complete | 2,710   |
| S9  | S6 OR S7 OR S8                                                                                                                                                                                                                                                                                                                      | Expanders - Apply equivalent subjects<br>Search modes - Boolean/Phrase | Interface - EBSCOhost Research Databases<br>Search Screen - Advanced Search<br>Database - CINAHL Complete | 371,341 |
| S8  | ((equipment* OR utensil# OR clothing OR pipet* OR droplet* OR Aerosol* OR cough* OR communicable OR autochthonous OR horizontal OR pathogen* OR disease* OR virus* OR air-borne OR air-microbiology) N3 (spread* OR transmi* OR induc* OR stimulat* OR genrat* OR contamina* OR (infect* N4 (ventilat* OR respirat*)) OR dispers*)) | Expanders - Apply equivalent subjects<br>Search modes - Boolean/Phrase | Interface - EBSCOhost Research Databases<br>Search Screen - Advanced Search<br>Database - CINAHL Complete | 216,030 |
| S7  | (MH "Disease Transmission, Horizontal+") OR (MH "Equipment Contamination") OR (MH "Laboratory Infection") OR (MH "Infection Control") OR ((MH "Laboratories"))                                                                                                                                                                      | Expanders - Apply equivalent subjects<br>Search modes - Boolean/Phrase | Interface - EBSCOhost Research Databases<br>Search Screen - Advanced Search<br>Database - CINAHL Complete | 36,836  |

|    |                                                                                                                                                                                                                                                                                                                                                                                                                                                                                    |                                                                        |                                                                                                           |         |
|----|------------------------------------------------------------------------------------------------------------------------------------------------------------------------------------------------------------------------------------------------------------------------------------------------------------------------------------------------------------------------------------------------------------------------------------------------------------------------------------|------------------------------------------------------------------------|-----------------------------------------------------------------------------------------------------------|---------|
|    | AND (MH "Occupational Exposure")<br>OR (MH "Aerosols")                                                                                                                                                                                                                                                                                                                                                                                                                             |                                                                        |                                                                                                           |         |
| S6 | (fomite# OR ((cross OR health* OR nosocomial OR hospital? OR lab OR labs OR laborator*) N2 (infection# or pneumonia#)) OR (infection* W0 control) OR ((destr* or preven*) N3 (pathogen# OR germ#)))                                                                                                                                                                                                                                                                                | Expanders - Apply equivalent subjects<br>Search modes - Boolean/Phrase | Interface - EBSCOhost Research Databases<br>Search Screen - Advanced Search<br>Database - CINAHL Complete | 192,850 |
| S5 | S1 OR S2 OR S3 OR S4                                                                                                                                                                                                                                                                                                                                                                                                                                                               | Expanders - Apply equivalent subjects<br>Search modes - Boolean/Phrase | Interface - EBSCOhost Research Databases<br>Search Screen - Advanced Search<br>Database - CINAHL Complete | 6,792   |
| S4 | TI ( ("2019" W0 (novel OR new) W0 corona*) OR ("2019" W0 (CoV OR nCoV)) OR (coronavirus W0 disease W0 "2019 ") OR COVID19 OR COVID-19 OR ((Novel OR New) W0 Corona*) OR SARS2 OR SARS-CoV-2 OR (SARS N1 (coronaviridae OR coronavirus)) OR ((sars OR Coronavirus) W0 "2") OR nCov OR 2019ncov ) OR AB ( ("2019" W0 (novel OR new) W0 corona*) OR ("2019" W0 (CoV OR nCoV)) OR (coronavirus W0 disease W0 "2019") OR COVID19 OR COVID-19 OR ((Novel OR New) W0 Corona*) OR SARS2 OR | Expanders - Apply equivalent subjects<br>Search modes - Boolean/Phrase | Interface - EBSCOhost Research Databases<br>Search Screen - Advanced Search<br>Database - CINAHL Complete | 1953    |



SARS-CoV-2 OR (SARS N1  
 (coronaviridae OR coronavirus)) OR  
 ((sars OR Coronavirus) W0 "2") OR  
 nCov OR 2019ncov) ) OR MW ( ("2019"  
 W0 (novel OR new) W0 corona\*) OR ("2019"  
 W0 (CoV OR nCoV)) OR (coronavirus W0  
 disease W0 "2019") OR COVID19 OR  
 COVID-19 OR ((Novel OR New) W0 Corona\*)  
 OR SARS2 OR SARS-CoV-2 OR (SARS N1  
 (coronaviridae OR coronavirus)) OR  
 ((sars OR Coronavirus) W0 "2") OR  
 nCov OR 2019ncov) )

TI ( (Mers OR (middle W0 east W0  
 respiratory W0 syndrome) OR (middle W0  
 east W0 respiratory W0 syndrome W0  
 (associated OR related) W0 (coronavirus  
 OR Cov)) OR Mers-Cov OR ((Mers-related  
 OR mers-associated) W0 (coronavirus OR  
 cov))) ) OR AB ( (Mers OR (middle W0  
 east W0 respiratory W0 syndrome) OR  
 (middle W0 east W0 respiratory W0  
 syndrome W0 (associated OR related) W0  
 (coronavirus OR Cov)) OR Mers-Cov OR  
 ((Mers-related OR mers-associated) W0  
 (coronavirus OR

Expanders - Apply equivalent  
 subjects  
 Search modes - Boolean/Phrase

Interface - EBSCOhost Research Databases  
 Search Screen - Advanced Search  
 Database - CINAHL Complete

cov))) ) OR MW ( (Mers OR (middle  
 W0 east W0 respiratory W0  
 syndrome) OR (middle W0 east W0  
 respiratory W0 syndrome W0  
 (associated OR related) W0  
 (coronavirus OR Cov)) OR Mers-Cov  
 OR ((Mers-related OR mers-  
 associated) W0 (coronavirus OR  
 cov))) )

TI ( ((severe W0 acute W0 respiratory  
 W0 syndrome) OR SARs OR Sars-cov  
 OR ((sars-associated OR sars-related)  
 W0 (cov OR coronavirus))) OR SARI  
 OR ((severe W0 acute W0 respiratory  
 W0 (infection or syndrome))) OR AB ( ((severe W0 acute W0 respiratory W0  
 syndrome) OR SARs OR Sars-cov OR  
 ((sars-associated OR sars-related) W0  
 (cov OR coronavirus))) OR SARI OR  
 ((severe W0 acute W0 respiratory W0  
 (infection or syndrome))) OR MW ( ((severe W0 acute W0 respiratory W0  
 syndrome) OR SARs OR Sars-cov OR  
 ((sars-associated OR sars-related) W0  
 (cov OR coronavirus))) OR SARI OR  
 ((severe W0 acute W0 respiratory W0  
 (infection or syndrome)))

Expanders - Apply equivalent  
 subjects  
 Search modes - Boolean/Phrase

Interface - EBSCOhost Research Databases  
 Search Screen - Advanced Search  
 Database - CINAHL Complete

|    |                                                                                                                                                                 |                                                                        |                                                                                                           |      |
|----|-----------------------------------------------------------------------------------------------------------------------------------------------------------------|------------------------------------------------------------------------|-----------------------------------------------------------------------------------------------------------|------|
| S1 | (MH "SARS Virus") OR (MH "Severe Acute Respiratory Syndrome") OR (MH "Middle East Respiratory Syndrome Coronavirus") OR (MH "Middle East Respiratory Syndrome") | Expanders - Apply equivalent subjects<br>Search modes - Boolean/Phrase | Interface - EBSCOhost Research Databases<br>Search Screen - Advanced Search<br>Database - CINAHL Complete | 2601 |
|----|-----------------------------------------------------------------------------------------------------------------------------------------------------------------|------------------------------------------------------------------------|-----------------------------------------------------------------------------------------------------------|------|

**Chinese databases**

**CNKI (inception to May 1, 2020)**

SU=('2019?新? 冠状' + '2019? cov' + '冠状病毒? 病? 2019' + 'covid19' + 'covid-19' + '新? 冠状' + 'sars2' + 'sars-cov-2' + 'ncov')\*( ('污染' + ('交叉' + '健康' + '医院' + '实验' + '感染')\*( '感染' + '肺炎') + ('感染')\*( '控制') + ('销毁' + '预防')\*( '病原' + '菌')) + ('污染' + '传染病传播' + '患者到医学专业人员' + '传染病传播' + '用品污染' + '设备污染' + '实验室感染' + '感染控制' + '气溶胶' + ('实验室')\*( '职业暴露' + '职业病')) + (('设备' + '用品' + '用具' + '衣' + '移液器' + '滴' + '气溶胶' + '咳嗽' + '传染' + '自发性' + '水平' + '病原' + '病' + '病毒' + '空气传播' + '空气微生物')\*( '传播' + '传' + '诱导' + '诱发' + '刺激' + '生产' + '产生' + '污染' + '散' + (('感染')\*( '通气' + '呼吸'))))

Search hits: 781 references

### Wanfang (inception to May 1, 2020)

主题:(('2019?新? 冠状' + '2019? cov' + '冠状病毒? 病? 2019' + 'covid19' + 'covid-19' + '新? 冠状' + 'sars2' + 'sars-cov-2' + 'ncov')\*( ('污染' + ('交叉' + '健康' + '医院' + '实验' + '感染')\*( '感染' + '肺炎') + ('感染')\*( '控制') + ('销毁' + '预防')\*( '病原' + '菌')) + ('污染' + '传染病传播' + '患者到医学专业人员' + '传染病传播' + '用品污染' + '设备污染' + '实验室感染' + '感染控制' + '气溶胶' + ('实验室')\*( '职业暴露' + '职业病')) + (('设备' + '用品' + '用具' + '衣' + '移液器' + '滴' + '气溶胶' + '咳嗽' + '传染' + '自发性' + '水平' + '病原' + '病' + '病毒' + '空气传播' + '空气微生物')\*( '传播' + '传' + '诱导' + '诱发' + '刺激' + '生产' + '产生' + '污染' + '散' + (('感染')\*( '通气' + '呼吸'))))

Search hits: 5 references

### VIP (inception to May 1, 2020)

M=('2019?新? 冠状' + '2019? cov' + '冠状病毒? 病? 2019' + 'covid19' + 'covid-19' + '新? 冠状' + 'sars2' + 'sars-cov-2' + 'ncov')\*( ('污染' + ('交叉' + '健康' + '医院' + '实验' + '感染')\*( '感染' + '肺炎') + ('感染')\*( '控制') + ('销毁' + '预防')\*( '病原' + '菌')) + ('污染' + '传染病传播' + '患者到医学专业人员' + '传染病传播' + '用品污染' + '设备污染' + '实验室感染' + '感染控制' + '气溶胶' + ('实验室')\*( '职业暴露' + '职业病')) + (('设备' + '用品' + '用具' + '衣' + '移液器' + '滴' + '气溶胶' + '咳嗽' + '传染' + '自发性' + '水平' + '病原' + '病' + '病毒' + '空气传播' + '空气微生物')\*( '传播' + '传' + '诱导' + '诱发' + '刺激' + '生产' + '产生' + '污染' + '散' + (('感染')\*( '通气' + '呼吸'))))

Search hits: 1656 references

### Sinomed (inception to May 1, 2020)

("2019?新? 冠状"[常用字段:智能] OR "2019? cov"[常用字段:智能] OR "冠状病毒? 病? 2019"[常用字段:智能] OR "covid19"[常用字段:智能] OR "covid-19"[常用字段:智能] OR "新? 冠状"[常用字段:智能] OR "sars2"[常用字段:智能] OR "sars-cov-2"[常用字段:智能] OR "ncov"[常用字段:智能]) AND (("污染"[常用字段:智能] OR ("感染"[常用字段:智能]) AND ("控制"[常用字段:智能])) OR (("交叉"[常用字段:智能] OR "健康"[常用字段:智能] OR "医院"[常用字段:智能] OR "实验"[常用字段:智能] OR "感染"[常用字段:智能]) AND ("感染"[常用字段:智能] OR "肺炎"[常用字段:智能])) OR (("销毁"[常用字段:智能] OR "预防"[常用字段:智能]) AND ("病原"[常用字段:智能] OR "菌"[常用字段:智能])) OR ("污染"[常用字段:智能] OR "传染病传播"[常用字段:智能] OR "患者到医学专业人员"[常用字段:智能] OR "传染病传播"[常用字段:智能] OR "用品污染"[常用字段:智能] OR "设备污染"[常用字段:智能] OR "实验室感染"[常用字段:智能] OR "感染控制"[常用字段:智能] OR "气溶胶"[常用字段:智能] OR ("实验室"[常用字段:智能]) AND ("职业暴露"[常用字段:智能] OR "职业病"[常用字段:智能])) OR (("设备"[常用字段:智能] OR "用品"[常用字段:智能] OR "用具"[常用字段:智能] OR "衣"[常用字段:智能] OR "移液器"[常用字段:智能] OR "滴"[常用字段:智能] OR "气溶胶"[常用字段:智能] OR "咳嗽"[常用字段:智能] OR "传染"[常用字段:智能] OR "自发性"[常用字段:智能] OR "水平"[常用字段:智能] OR "病原"[常用字段:智能] OR "病"[常用字段:智能] OR "病毒"[常用字段:智能] OR "空气传播"[常用字段:智能] OR "空气微生物"[常用字段:智能]) AND ("传播"[常用字段:智能] OR "传"[常用字段:智能] OR "诱导"[常用字段:智能] OR "诱发"[常用字段:智能] OR "刺激"[常用字段:智能] OR "生产"[常用字段:智能] OR "产生"[常用字段:智能] OR "污染"[常用字段:智能] OR "散"[常用字段:智能] OR ("感染"[常用字段:智能]) AND ("通气"[常用字段:智能] OR "呼吸"[常用字段:智能]))))

Search hits: 2795 references

WHO Chinese databases (Feb 2, 2020 to May 1, 2020)

Search Strategy:

#1 “2019冠状病毒”

#2 “新型冠状病毒”

#3 “新冠肺炎”

#4 “武汉2019”

#5 “武汉病毒”

#6 “武汉肺炎”

#7 “2019-nCoV”

#8 “SARS-CoV-2”

#9 “Novel coronavirus”

#10 “nCoV”

#11 “Emerging Coronavirus”

#12 “new coronavirus”

#13 “COVID-19”

#14 “coronavirus”

#15 OR/#1-#14

Search hits: 1800 references

## Supplement. Stream 4 search strategy

Database: Ovid MEDLINE(R) and Epub Ahead of Print, In-Process & Other Non-Indexed Citations and Daily <January 1, 2010 to May 1, 2020>

Search Strategy:

- 
- 1 exp Positive-Pressure Respiration/ (25632)
  - 2 exp High-Frequency Ventilation/ (2823)
  - 3 exp ventilators, mechanical/ (9001)
  - 4 Ventilation/ (5651)
  - 5 exp Intubation, Intratracheal/ (38466)
  - 6 suction/ (12378)
  - 7 Tracheostomy/ (7302)
  - 8 Bronchoscopy/ (24972)
  - 9 Thoracostomy/ (1439)
  - 10 exp "Nebulizers and Vaporizers"/ (11233)
  - 11 Sputum/ (21208)
  - 12 Oxygen Inhalation Therapy/ (14246)
  - 13 Autopsy/ (41856)
  - 14 exp Respiratory Function Tests/ (232861)
  - 15 exp Spirometry/ (21722)
  - 16 exp cardiopulmonary resuscitation/ (17736)
  - 17 respiration, artificial/ (48154)
  - 18 Breathing exercises/ (3379)
  - 19 or/1-18 (462703)
  - 20 Physical Therapy Modalities/ (36399)
  - 21 thorax/ (21273)
  - 22 20 and 21 (131)
  - 23 19 or 22 (462778)
  - 24 (ventilation or ventilator or ventilating or ventilatory).ti,ab. (145885)
  - 25 (respirator or respirators or respirat\* support or respirat\* care).ti,ab. (10569)
  - 26 (intubation or intubated or extubation or extubated).ti,ab. (62256)
  - 27 ((respiratory or airway or air way or open) adj3 suction\*).ti,ab. (399)
  - 28 (nebulize\* or nebulise\* or aerosolize\* or aerosolise\*).ti,ab. (14483)
  - 29 heat moisture exchange\*.ti,ab. (58)
  - 30 (bronchoscopy or tracheostomy or thoracostomy).ti,ab. (32540)
  - 31 (chest adj3 physiotherapy).ti,ab. (846)
  - 32 (sputum adj3 (induction or inducing)).ti,ab. (774)
  - 33 oxygen therap\*.ti,ab. (10630)
  - 34 (lung function test\* or pulmonary function test\*).ti,ab. (15291)
  - 35 ((continuous or bilevel) adj2 (positive airway or positive pressure)).ti,ab. (9898)
  - 36 (cardiopulmonary resuscitation or artificial resuscitation or artificial respiration).ti,ab. (15879)
  - 37 (autopsy adj3 lung tissue\*).ti,ab. (119)

38 or/24-37 (277913)  
39 23 or 38 (601932)  
40 exp Health personnel/ (508238)  
41 (health care worker\* or healthcare worker\* or health care provider\* or healthcare provider\* or physiotherapist\* or dentist\* or nurse\* or doctor\* or physician\* or health personnel or medical personnel or hospital personnel or hospital worker\* or staff or healthcare professional\* or health care professional\* or care giver\* or caregiver\* or paramedic\* or therapist\*).ti,ab. (1070764)  
42 40 or 41 (1330082)  
43 Infectious Disease Transmission, Patient-to-Professional/ (3885)  
44 occupational exposure/ (54047)  
45 air microbiology/ (7579)  
46 infectious disease transmission/ (9106)  
47 infection control/ (23575)  
48 infection control, dental/ (1127)  
49 exp cross infection/ (58807)  
50 Disease Outbreaks/ (78859)  
51 Aerosols/ (30094)  
52 ((aerosol\* or cough\* or droplet\* or infection\* or infectious or disease\*) adj3 (generat\* or induc\* or stimulat\* or produc\* or creat\* or respirable range\* or dispers\* or transmission or transmitted or transmit or spread\* or disseminat\* or count\* or precaution\* or control\* or inhibit\* or prevent\* or reduc\*)).ti,ab. (464017)  
53 cross infection.ti,ab. (2247)  
54 or/44-53 (670356)  
55 39 and 43 (306)  
56 39 and 41 and 54 (2558)  
57 55 or 56 (2704)  
58 (aerosol\* adj2 generat\* adj2 procedure\*).ti,ab. (99)  
59 57 or 58 (2761)  
60 exp \*Health personnel/ (371456)  
61 (health care worker\* or healthcare worker\* or health care provider\* or healthcare provider\* or physiotherapist\* or dentist\* or nurse\* or doctor\* or physician\* or hospital personnel or health personnel or medical personnel or hospital worker\* or staff or healthcare professional\* or health care professional\* or care giver\* or caregiver\* or paramedic\* or therapist\*).ti. (354397)  
62 60 or 61 (584444)  
63 Infectious Disease Transmission, Patient-to-Professional/ (3885)  
64 occupational exposure/ (54047)  
65 air microbiology/ (7579)  
66 infectious disease transmission/ (9106)  
67 infection control/ (23575)  
68 infection control, dental/ (1127)  
69 exp cross infection/ (58807)  
70 Disease Outbreaks/ (78859)



71 Aerosols/ (30094)  
72 ((aerosol\* or cough\* or droplet\* or infection\* or infectious or disease\*) adj3 (generat\* or induc\* or stimulat\* or produc\* or creat\* or respirable range\* or dispers\* or transmission or transmitted or transmit or spread\* or disseminat\* or count\* or precaution\* or control\* or inhibit\* or prevent\* or reduc\*)).ti,ab. (464017)  
73 cross infection.ti,ab. (2247)  
74 or/63-73 (671851)  
75 human influenza/ (48539)  
76 exp Influenza A virus/ (43199)  
77 SARS virus/ (3009)  
78 Severe Acute Respiratory Syndrome/ (4563)  
79 exp tuberculosis/ (190872)  
80 exp pneumonia/ (92607)  
81 or/75-80 (352437)  
82 (influenza\* or H1N1 or tuberculosis or pneumonia or pneumococcus or severe acute respiratory syndrome or SARS or acute respiratory infection\*).ti,ab. (416304)  
83 81 or 82 (522435)  
84 62 and 74 and 83 (2291)  
85 59 or 84 (4785)  
86 meta-analysis.pt. (114083)  
87 meta-analysis/ or systematic review/ or meta-analysis as topic/ or exp technology assessment, biomedical/ (214672)  
88 ((systematic\* adj3 (review\* or overview\*)) or (methodologic\* adj3 (review\* or overview\*))).ti,ab. (184744)  
89 ((quantitative adj3 (review\* or overview\* or synthes\*)) or (research adj3 (integrati\* or overview\*))).ti,ab. (10701)  
90 ((integrative adj3 (review\* or overview\*)) or (collaborative adj3 (review\* or overview\*)) or (pool\* adj3 analy\*)).ti,ab. (26108)  
91 (data synthes\* or data extraction\* or data abstraction\*).ti,ab. (26398)  
92 (handsearch\* or hand search\*).ti,ab. (9166)  
93 (mantel haenszel or peto or der simonian or dersimonian or fixed effect\* or latin square\*).ti,ab. (25844)  
94 (met analy\* or metanaly\* or health technology assessment\* or HTA or HTAs).ti,ab. (6397)  
95 (meta regression\* or metaregression\* or mega regression\*).ti,ab. (8588)  
96 (meta-analy\* or metaanaly\* or systematic review\* or biomedical technology assessment\* or bio-medical technology assessment\*).mp,hw. (300324)  
97 (medline or Cochrane or pubmed or medlars).ti,ab,hw. (215824)  
98 (cochrane or health technology assessment or evidence report).jw. (16941)  
99 (meta-analysis or systematic review).mp. (279561)  
100 or/86-99 (438774)  
101 (Randomized Controlled Trial or Controlled Clinical Trial).pt. (593647)  
102 Randomized Controlled Trial/ (504846)  
103 Randomized Controlled Trials as Topic/ (132435)  
104 Controlled Clinical Trial/ (93651)

105 Controlled Clinical Trials as Topic/ (5501)  
106 Randomization/ (102644)  
107 Random Allocation/ (102644)  
108 Double-Blind Method/ (157371)  
109 Double-Blind Studies/ (157371)  
110 Single-Blind Method/ (28441)  
111 Single-Blind Studies/ (28441)  
112 Placebos/ (34842)  
113 Control Groups/ (1666)  
114 (random\* or sham or placebo\*).ti,ab,hw. (1479970)  
115 ((singl\* or doubl\*) adj (blind\* or dumm\* or mask\*)).ti,ab,hw. (234799)  
116 ((tripl\* or trebl\*) adj (blind\* or dumm\* or mask\*)).ti,ab,hw. (992)  
117 (control\* adj3 (study or studies or trial\*)).ti,ab. (521560)  
118 (Nonrandom\* or non random\* or non-random\* or quasi-random\* or  
quasirandom\*).ti,ab,hw. (43416)  
119 (allocated adj1 to).ti,ab,hw. (0)  
120 ((open label or open-label) adj5 (study or studies or trial\*)).ti,ab,hw. (34087)  
121 or/101-120 (1774789)  
122 epidemiologic methods.sh. (31315)  
123 epidemiologic studies.sh. (8294)  
124 cohort studies/ (259990)  
125 cohort analysis/ (259990)  
126 longitudinal studies/ (133461)  
127 prospective studies/ (536462)  
128 follow-up studies/ (639145)  
129 retrospective studies/ (815010)  
130 case-control studies/ (282009)  
131 exp case control study/ (1074288)  
132 cross-sectional study/ (325582)  
133 observational study/ (78330)  
134 quasi experimental study/ (662)  
135 (observational adj3 (study or studies or design or analysis or analyses)).ti,ab. (141660)  
136 (cohort adj7 (study or studies or design or analysis or analyses)).ti,ab. (274444)  
137 (prospective adj7 (study or studies or design or analysis or analyses or cohort)).ti,ab.  
(427568)  
138 ((follow up or followup) adj7 (study or studies or design or analysis or analyses)).ti,ab.  
(133765)  
139 ((longitudinal or longterm or (long adj term)) adj7 (study or studies or design or analysis  
or analyses or data or cohort)).ti,ab. (264279)  
140 (retrospective adj7 (study or studies or design or analysis or analyses or cohort or data or  
review)).ti,ab. (475775)  
141 ((case adj control) or (case adj comparison) or (case adj controlled)).ti,ab. (127301)  
142 (case-referent adj3 (study or studies or design or analysis or analyses)).ti,ab. (616)  
143 (population adj3 (study or studies or analysis or analyses)).ti,ab. (178734)

144 (descriptive adj3 (study or studies or design or analysis or analyses)).ti,ab. (74903)  
145 ((multidimensional or (multi adj dimensional)) adj3 (study or studies or design or analysis or analyses)).ti,ab. (3602)  
146 (cross adj sectional adj7 (study or studies or design or research or analysis or analyses or survey or findings)).ti,ab. (284716)  
147 ((natural adj experiment) or (natural adj experiments)).ti,ab. (2054)  
148 (quasi adj (experiment or experiments or experimental)).ti,ab. (13300)  
149 ((non experiment or nonexperiment or non experimental or nonexperimental) adj3 (study or studies or design or analysis or analyses)).ti,ab. (1302)  
150 (prevalence adj3 (study or studies or analysis or analyses)).ti,ab. (37071)  
151 case series.ti,ab. (72539)  
152 case reports.pt. (2094108)  
153 case report/ (2094108)  
154 case study/ (2094108)  
155 (case adj3 (report or reports or study or studies or histories)).ti,ab. (757977)  
156 organizational case studies.sh. (12269)  
157 or/122-156 (5423588)  
158 exp clinical pathway/ (6657)  
159 exp clinical protocol/ (166131)  
160 exp consensus/ (12616)  
161 exp consensus development conference/ (11901)  
162 exp consensus development conferences as topic/ (2819)  
163 critical pathways/ (6657)  
164 exp guideline/ (33762)  
165 guidelines as topic/ (39479)  
166 exp practice guideline/ (26832)  
167 practice guidelines as topic/ (116539)  
168 health planning guidelines/ (4080)  
169 (guideline or practice guideline or consensus development conference or consensus development conference, NIH).pt. (43076)  
170 (position statement\* or policy statement\* or practice parameter\* or best practice\*).ti,ab. (32170)  
171 (standards or guideline or guidelines).ti. (98565)  
172 ((practice or treatment\*) adj guideline\*).ab. (29083)  
173 (CPG or CPGs).ti. (5687)  
174 consensus\*.ti. (24332)  
175 consensus\*.ab. /freq=2 (24897)  
176 ((critical or clinical or practice) adj2 (path or paths or pathway or pathways or protocol\*)).ti,ab. (19553)  
177 recommendat\*.ti. (37843)  
178 (care adj2 (standard or path or paths or pathway or pathways or map or maps or plan or plans)).ti,ab. (57424)  
179 (algorithm\* adj2 (screening or examination or test or tested or testing or assessment\* or diagnosis or diagnoses or diagnosed or diagnosing)).ti,ab. (7385)

180 (algorithm\* adj2 (pharmacotherap\* or chemotherap\* or chemotreatment\* or therap\* or  
treatment\* or intervention\*).ti,ab. (9511)  
181 or/158-180 (591624)  
182 100 or 121 or 157 or 181 (7245526)  
183 85 and 182 (2221)  
184 limit 183 to yr="2010 -Current" (1147)  
185 conference abstract.pt. (0)  
186 184 not 185 (1147)

\*\*\*\*\*

Database: Embase <January 1, 2010 to May 1, 2020>

Search Strategy:

---

- 1 positive end expiratory pressure/ (47993)
- 2 high frequency ventilation/ (2661)
- 3 intermittent positive pressure ventilation/ (1955)
- 4 endotracheal intubation/ (39023)
- 5 suction/ (8576)
- 6 Tracheostomy/ (22342)
- 7 tracheobronchial toilet/ (2642)
- 8 exp bronchoscopy/ (48799)
- 9 thorax drainage/ (8659)
- 10 nebulization/ (6480)
- 11 exp nebulizer/ (9233)
- 12 Sputum/ (19322)
- 13 sputum analysis/ (8762)
- 14 sputum examination/ (1781)
- 15 oxygen therapy/ (25715)
- 16 Autopsy/ (82456)
- 17 exp lung function test/ (148155)
- 18 resuscitation/ (95279)
- 19 artificial ventilation/ (115211)
- 20 breathing exercise/ (6308)
- 21 or/1-20 (606093)
- 22 (ventilation or ventilator or ventilating or ventilatory).ti,ab,kw. (175485)
- 23 (respirator or respirators or respirat\* support or respirat\* care).ti,ab,kw. (11096)
- 24 (intubation or intubated or extubation or extubated).ti,ab,kw. (83855)
- 25 ((respiratory or airway or air way or open) adj3 suction\*).ti,ab,kw. (508)
- 26 (nebulize\* or nebulise\* or aerosolize\* or aerosolise\*).ti,ab,kw. (16759)
- 27 heat moisture exchange\*.ti,ab,kw. (63)
- 28 (bronchoscopy or tracheostomy or thoracostomy).ti,ab,kw. (46789)
- 29 (chest adj3 physiotherapy).ti,ab,kw. (1207)
- 30 (sputum adj3 (induction or inducing)).ti,ab,kw. (1235)
- 31 oxygen therap\*.ti,ab,kw. (12657)
- 32 (lung function test\* or pulmonary function test\*).ti,ab,kw. (24516)
- 33 ((continuous or bilevel) adj2 (positive airway or positive pressure)).ti,ab,kw. (13529)
- 34 (cardiopulmonary resuscitation or artificial resuscitation or artificial respiration).ti,ab,kw. (20231)
- 35 (autopsy adj3 lung tissue\*).ti,ab,kw. (122)
- 36 or/22-35 (342620)
- 37 21 or 36 (733828)
- 38 exp health care personnel/ (1356570)

39 (health care worker\* or healthcare worker\* or health care provider\* or healthcare provider\* or physiotherapist\* or dentist\* or nurse\* or doctor\* or physician\* or health personnel or medical personnel or hospital personnel or hospital worker\* or staff or healthcare professional\* or health care professional\* or care giver\* or caregiver\* or paramedic\* or therapist\*).ti,ab,kw. (1180442)

40 38 or 39 (1982207)

41 occupational exposure/ (60471)

42 airborne infection/ (1435)

43 infection control/ (72146)

44 exp cross infection/ (11794)

45 hospital infection/ (34728)

46 virus transmission/ (52585)

47 bacterial transmission/ (13233)

48 disease transmission/ (73389)

49 aerosol/ (39296)

50 ((aerosol\* or cough\* or droplet\* or infection\* or infectious or disease\*) adj3 (generat\* or induc\* or stimulat\* or produc\* or creat\* or respirable range\* or dispers\* or transmission or transmitted or transmit or spread\* or disseminat\* or count\* or precaution\* or control\* or inhibit\* or prevent\* or reduc\*)).ti,ab,kw. (503823)

51 cross infection.ti,ab,kw. (2379)

52 or/41-51 (762573)

53 37 and 40 and 52 (5044)

54 (aerosol\* adj2 generat\* adj2 procedure\*).ti,ab,kw. (104)

55 53 or 54 (5089)

56 exp \*health care personnel/ (384938)

57 (health care worker\* or healthcare worker\* or health care provider\* or healthcare provider\* or physiotherapist\* or dentist\* or nurse\* or doctor\* or physician\* or hospital personnel or health personnel or medical personnel or hospital worker\* or staff or healthcare professional\* or health care professional\* or care giver\* or caregiver\* or paramedic\* or therapist\*).ti,kw. (289059)

58 56 or 57 (568656)

59 occupational exposure/ (60471)

60 airborne infection/ (1435)

61 infection control/ (72146)

62 exp cross infection/ (11794)

63 hospital infection/ (34728)

64 virus transmission/ (52585)

65 bacterial transmission/ (13233)

66 disease transmission/ (73389)

67 aerosol/ (39296)

68 ((aerosol\* or cough\* or droplet\* or infection\* or infectious or disease\*) adj3 (generat\* or induc\* or stimulat\* or produc\* or creat\* or respirable range\* or dispers\* or transmission or transmitted or transmit or spread\* or disseminat\* or count\* or precaution\* or control\* or inhibit\* or prevent\* or reduc\*)).ti,ab,kw. (537332)

69 cross infection.ti,ab,kw. (2379)  
70 or/59-69 (793814)  
71 exp coronavirus infection/ (12644)  
72 exp influenza virus/ (25969)  
73 exp influenza/ (77766)  
74 Parainfluenza virus infection/ (1279)  
75 tuberculosis/ (84625)  
76 lung tuberculosis/ (33366)  
77 drug resistant tuberculosis/ (2301)  
78 streptococcus pneumoniae/ (34103)  
79 pneumonia/ (140141)  
80 Respiratory syncytial pneumovirus/ (11357)  
81 or/71-80 (379652)  
82 (influenza\* or H1N1 or tuberculosis or pneumonia or pneumococcus or severe acute respiratory syndrome or SARS or acute respiratory infection\*).ti,ab,kw. (388392)  
83 81 or 82 (535750)  
84 58 and 70 and 83 (2920)  
85 55 or 84 (7636)  
86 meta-analysis.pt. (0)  
87 meta-analysis/ or systematic review/ or meta-analysis as topic/ or exp technology assessment, biomedical/ (368479)  
88 ((systematic\* adj3 (review\* or overview\*)) or (methodologic\* adj3 (review\* or overview\*))).ti,ab,kw. (232653)  
89 ((quantitative adj3 (review\* or overview\* or synthes\*)) or (research adj3 (integrati\* or overview\*))).ti,ab,kw. (11866)  
90 ((integrative adj3 (review\* or overview\*)) or (collaborative adj3 (review\* or overview\*)) or (pool\* adj3 analy\*)).ti,ab,kw. (36577)  
91 (data synthes\* or data extraction\* or data abstraction\*).ti,ab,kw. (31641)  
92 (handsearch\* or hand search\*).ti,ab,kw. (10999)  
93 (mantel haenszel or peto or der simonian or dersimonian or fixed effect\* or latin square\*).ti,ab,kw. (31961)  
94 (met analy\* or metanaly\* or health technology assessment\* or HTA or HTAs).ti,ab,kw. (11347)  
95 (meta regression\* or metaregression\* or mega regression\*).ti,ab,kw. (10888)  
96 (meta-analy\* or metaanaly\* or systematic review\* or biomedical technology assessment\* or bio-medical technology assessment\*).mp,hw. (472474)  
97 (medline or Cochrane or pubmed or medlars).ti,ab,hw. (282770)  
98 (cochrane or health technology assessment or evidence report).jw. (23296)  
99 (meta-analysis or systematic review).mp. (443556)  
100 or/86-99 (627846)  
101 (Randomized Controlled Trial or Controlled Clinical Trial).pt. (0)  
102 Randomized Controlled Trial/ (556184)  
103 Randomized Controlled Trials as Topic/ (113758)  
104 Controlled Clinical Trial/ (418885)

105 Controlled Clinical Trials as Topic/ (9363)  
106 Randomization/ (78481)  
107 Random Allocation/ (74702)  
108 Double-Blind Method/ (121233)  
109 Double Blind Procedure/ (145615)  
110 Double-Blind Studies/ (129475)  
111 Single-Blind Method/ (35378)  
112 Single Blind Procedure/ (37372)  
113 Single-Blind Studies/ (37372)  
114 Placebos/ (240672)  
115 Placebo/ (296915)  
116 Control Groups/ (110201)  
117 Control Group/ (110201)  
118 (random\* or sham or placebo\*).ti,ab,hw,kw. (1812375)  
119 ((singl\* or doubl\*) adj (blind\* or dumm\* or mask\*)).ti,ab,hw,kw. (245326)  
120 ((tripl\* or trebl\*) adj (blind\* or dumm\* or mask\*)).ti,ab,hw,kw. (1257)  
121 (control\* adj3 (study or studies or trial\*)).ti,ab,kw. (650422)  
122 (Nonrandom\* or non random\* or non-random\* or quasi-random\* or quasirandom\*).ti,ab,hw,kw. (49354)  
123 (allocated adj1 to).ti,ab,hw,kw. (0)  
124 ((open label or open-label) adj5 (study or studies or trial\*)).ti,ab,hw,kw. (61468)  
125 or/101-124 (2280104)  
126 epidemiologic methods.sh. (4)  
127 epidemiologic studies.sh. (0)  
128 cohort studies/ (433474)  
129 cohort analysis/ (567281)  
130 longitudinal studies/ (111773)  
131 longitudinal study/ (131804)  
132 prospective studies/ (472166)  
133 prospective study/ (577076)  
134 follow-up studies/ (1004968)  
135 follow up/ (1462619)  
136 followup studies/ (0)  
137 retrospective studies/ (606368)  
138 retrospective study/ (881525)  
139 case-control studies/ (116348)  
140 exp case control study/ (168250)  
141 cross-sectional study/ (339621)  
142 observational study/ (195219)  
143 quasi experimental methods/ (0)  
144 quasi experimental study/ (6735)  
145 (observational adj3 (study or studies or design or analysis or analyses)).ti,ab,kw. (222297)  
146 (cohort adj7 (study or studies or design or analysis or analyses)).ti,ab,kw. (422484)



- 147 (prospective adj7 (study or studies or design or analysis or analyses or cohort)).ti,ab,kw. (597902)
- 148 ((follow up or followup) adj7 (study or studies or design or analysis or analyses)).ti,ab,kw. (187882)
- 149 ((longitudinal or longterm or (long adj term)) adj7 (study or studies or design or analysis or analyses or data or cohort)).ti,ab,kw. (349022)
- 150 (retrospective adj7 (study or studies or design or analysis or analyses or cohort or data or review)).ti,ab,kw. (762045)
- 151 ((case adj control) or (case adj comparison) or (case adj controlled)).ti,ab,kw. (157471)
- 152 (case-referent adj3 (study or studies or design or analysis or analyses)).ti,ab,kw. (397)
- 153 (population adj3 (study or studies or analysis or analyses)).ti,ab,kw. (252970)
- 154 (descriptive adj3 (study or studies or design or analysis or analyses)).ti,ab,kw. (108780)
- 155 ((multidimensional or (multi adj dimensional)) adj3 (study or studies or design or analysis or analyses)).ti,ab,kw. (3679)
- 156 (cross adj sectional adj7 (study or studies or design or research or analysis or analyses or survey or findings)).ti,ab,kw. (367096)
- 157 ((natural adj experiment) or (natural adj experiments)).ti,ab,kw. (2184)
- 158 (quasi adj (experiment or experiments or experimental)).ti,ab,kw. (15806)
- 159 ((non experiment or nonexperiment or non experimental or nonexperimental) adj3 (study or studies or design or analysis or analyses)).ti,ab,kw. (1651)
- 160 (prevalence adj3 (study or studies or analysis or analyses)).ti,ab,kw. (50081)
- 161 case series.ti,ab,kw. (100520)
- 162 case reports.pt. (0)
- 163 case report/ (1696605)
- 164 case study/ (65906)
- 165 (case adj3 (report or reports or study or studies or histories)).ti,ab,kw. (830892)
- 166 organizational case studies.sh. (2)
- 167 or/126-166 (5824424)
- 168 exp clinical pathway/ (8274)
- 169 exp clinical protocol/ (94159)
- 170 exp consensus/ (68743)
- 171 exp consensus development conference/ (23376)
- 172 exp consensus development conferences as topic/ (23376)
- 173 critical pathways/ (8274)
- 174 guidelines as topic/ (366913)
- 175 exp practice guideline/ (530982)
- 176 practice guidelines as topic/ (301084)
- 177 health planning guidelines/ (70637)
- 178 (guideline or practice guideline or consensus development conference or consensus development conference, NIH).pt. (0)
- 179 (position statement\* or policy statement\* or practice parameter\* or best practice\*).ti,ab,kw. (46014)
- 180 (standards or guideline or guidelines).ti,kw. (132217)
- 181 ((practice or treatment\*) adj guideline\*).ab. (42973)

182 (CPG or CPGs).ti,kw. (9105)  
183 consensus\*.ti,kw. (29176)  
184 consensus\*.ab. /freq=2 (30657)  
185 ((critical or clinical or practice) adj2 (path or paths or pathway or pathways or protocol\*)).ti,ab,kw. (29627)  
186 recommendat\*.ti,kw. (44881)  
187 (care adj2 (standard or path or paths or pathway or pathways or map or maps or plan or plans)).ti,ab,kw. (98721)  
188 (algorithm\* adj2 (screening or examination or test or tested or testing or assessment\* or diagnosis or diagnoses or diagnosed or diagnosing)).ti,ab,kw. (10093)  
189 (algorithm\* adj2 (pharmacotherap\* or chemotherap\* or chemotreatment\* or therap\* or treatment\* or intervention\*)).ti,ab,kw. (14392)  
190 or/168-189 (923657)  
191 100 or 125 or 167 or 190 (8171928)  
192 85 and 191 (3985)  
193 limit 192 to yr="2010 -Current" (2830)  
194 (2010\* or 2011\* or 2012\* or 2013\* or 2014\* or 2015\* or 2016\* or 2017\* or 2018\* or 2019\* or 2020\*).dc. (15668448)  
195 192 and 194 (2956)  
196 193 or 195 (2956)  
197 conference abstract.pt. (3767678)  
198 196 not 197 (1801)

\*\*\*\*\*

### Supplement 3. Stream 1 PRISMA Flow Chart

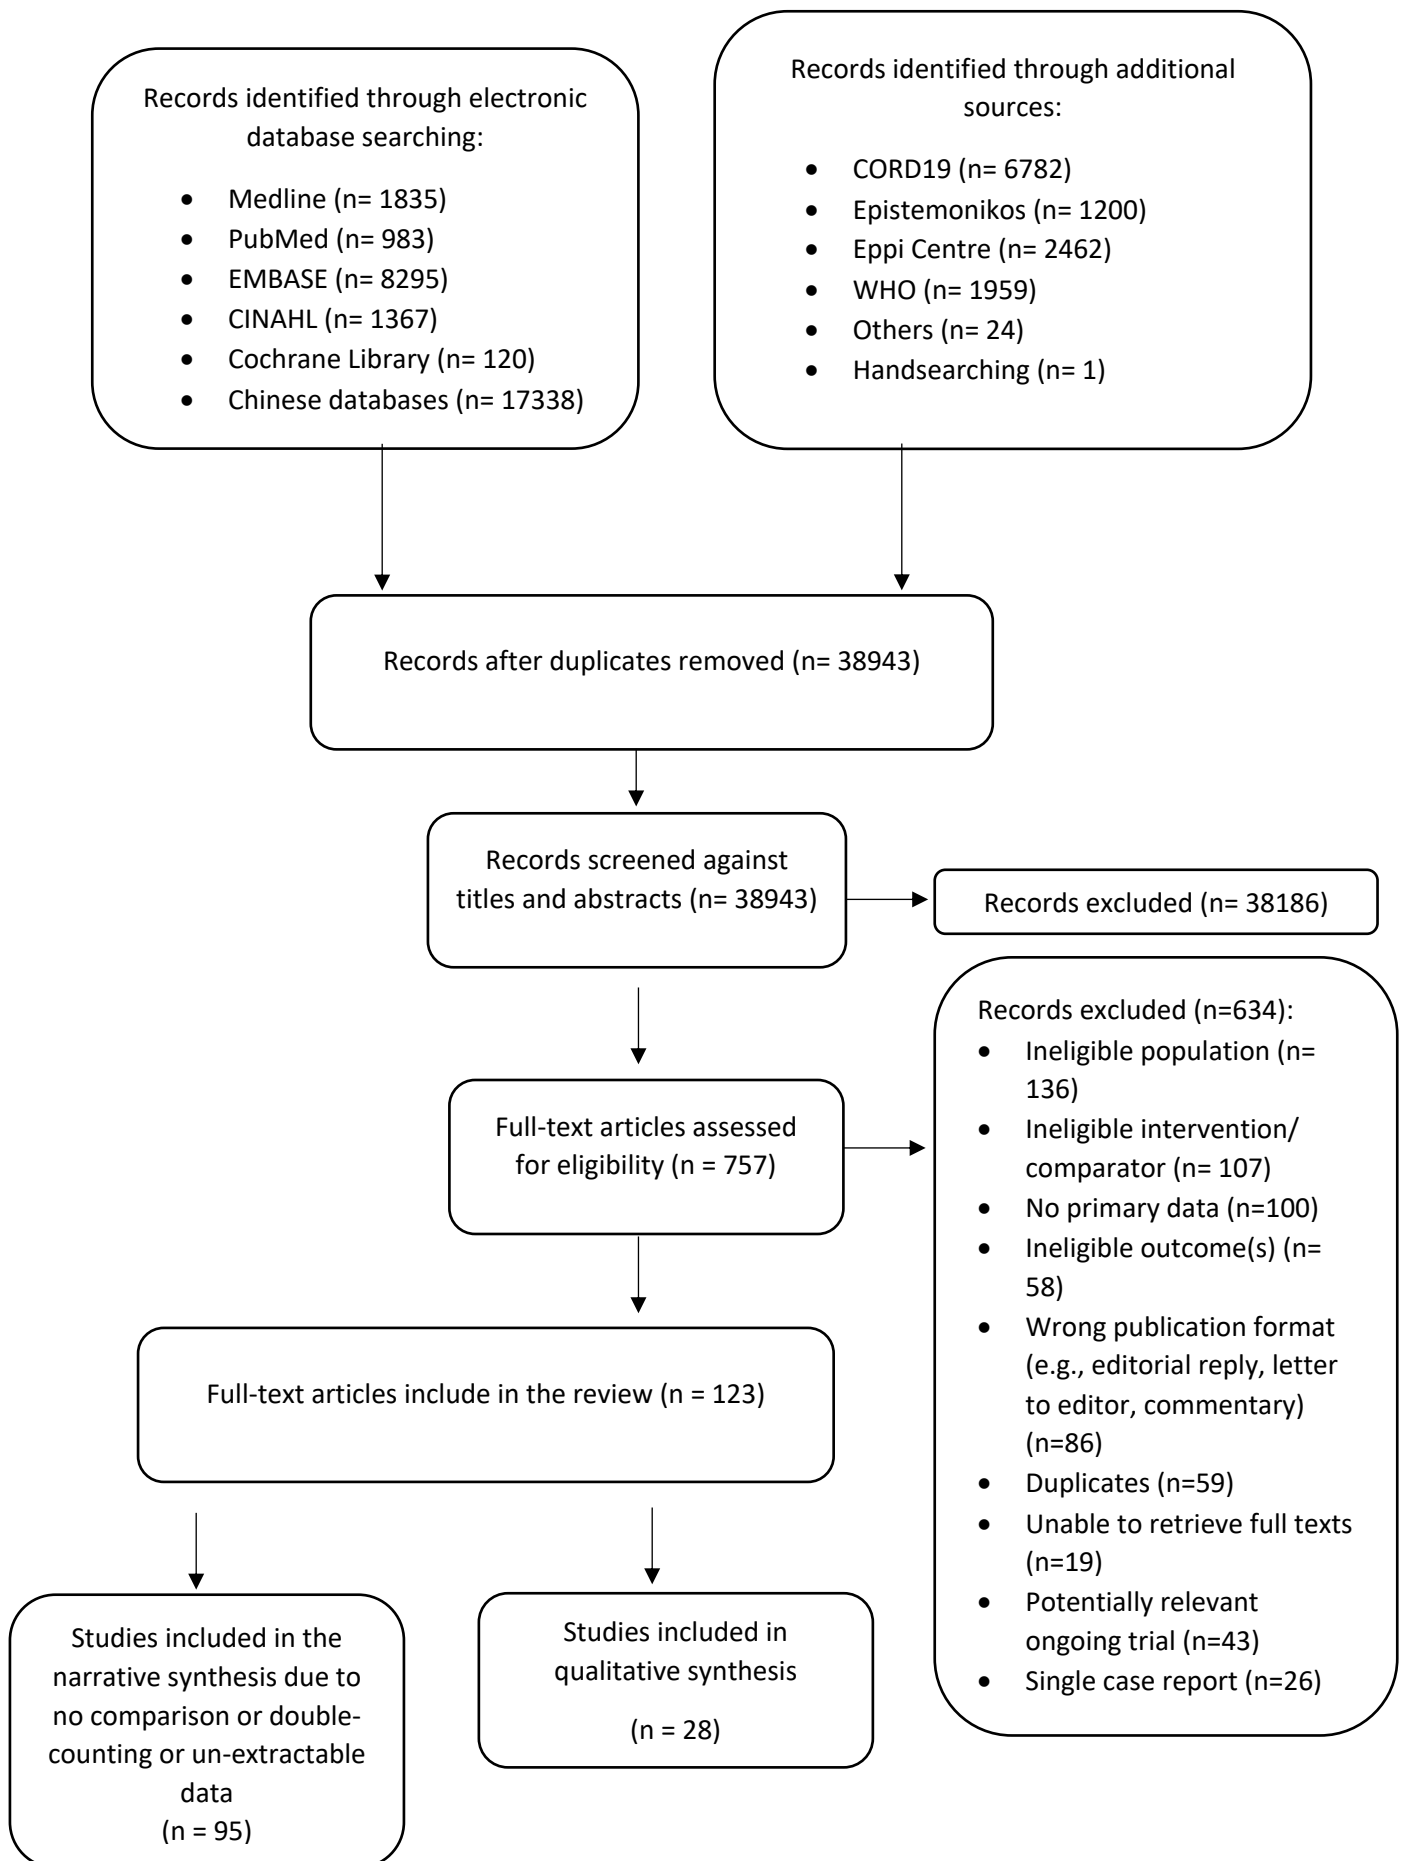

Supplement 3. Stream 2 PRISMA Flow Chart

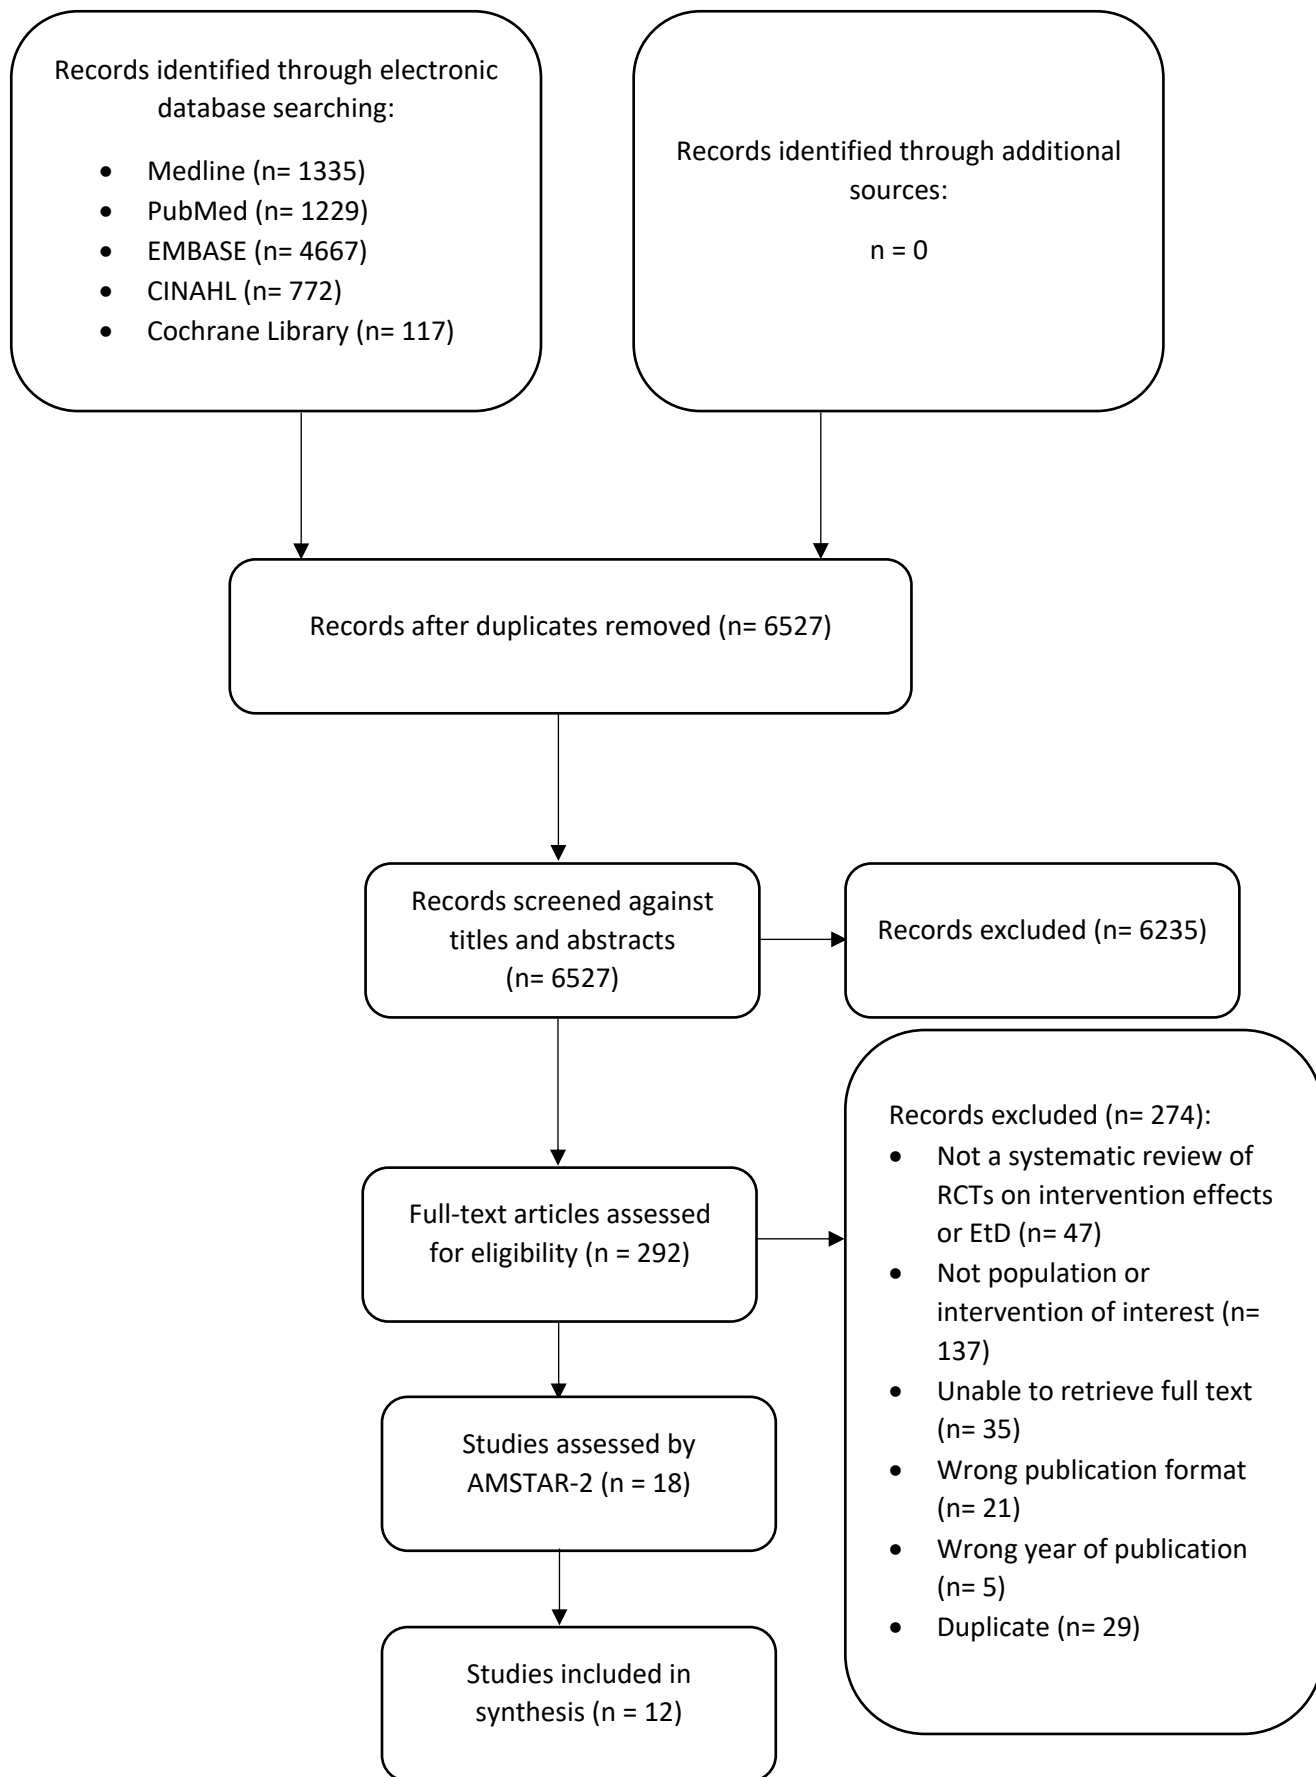

Supplement 3. Stream 3 PRISMA Flow Chart

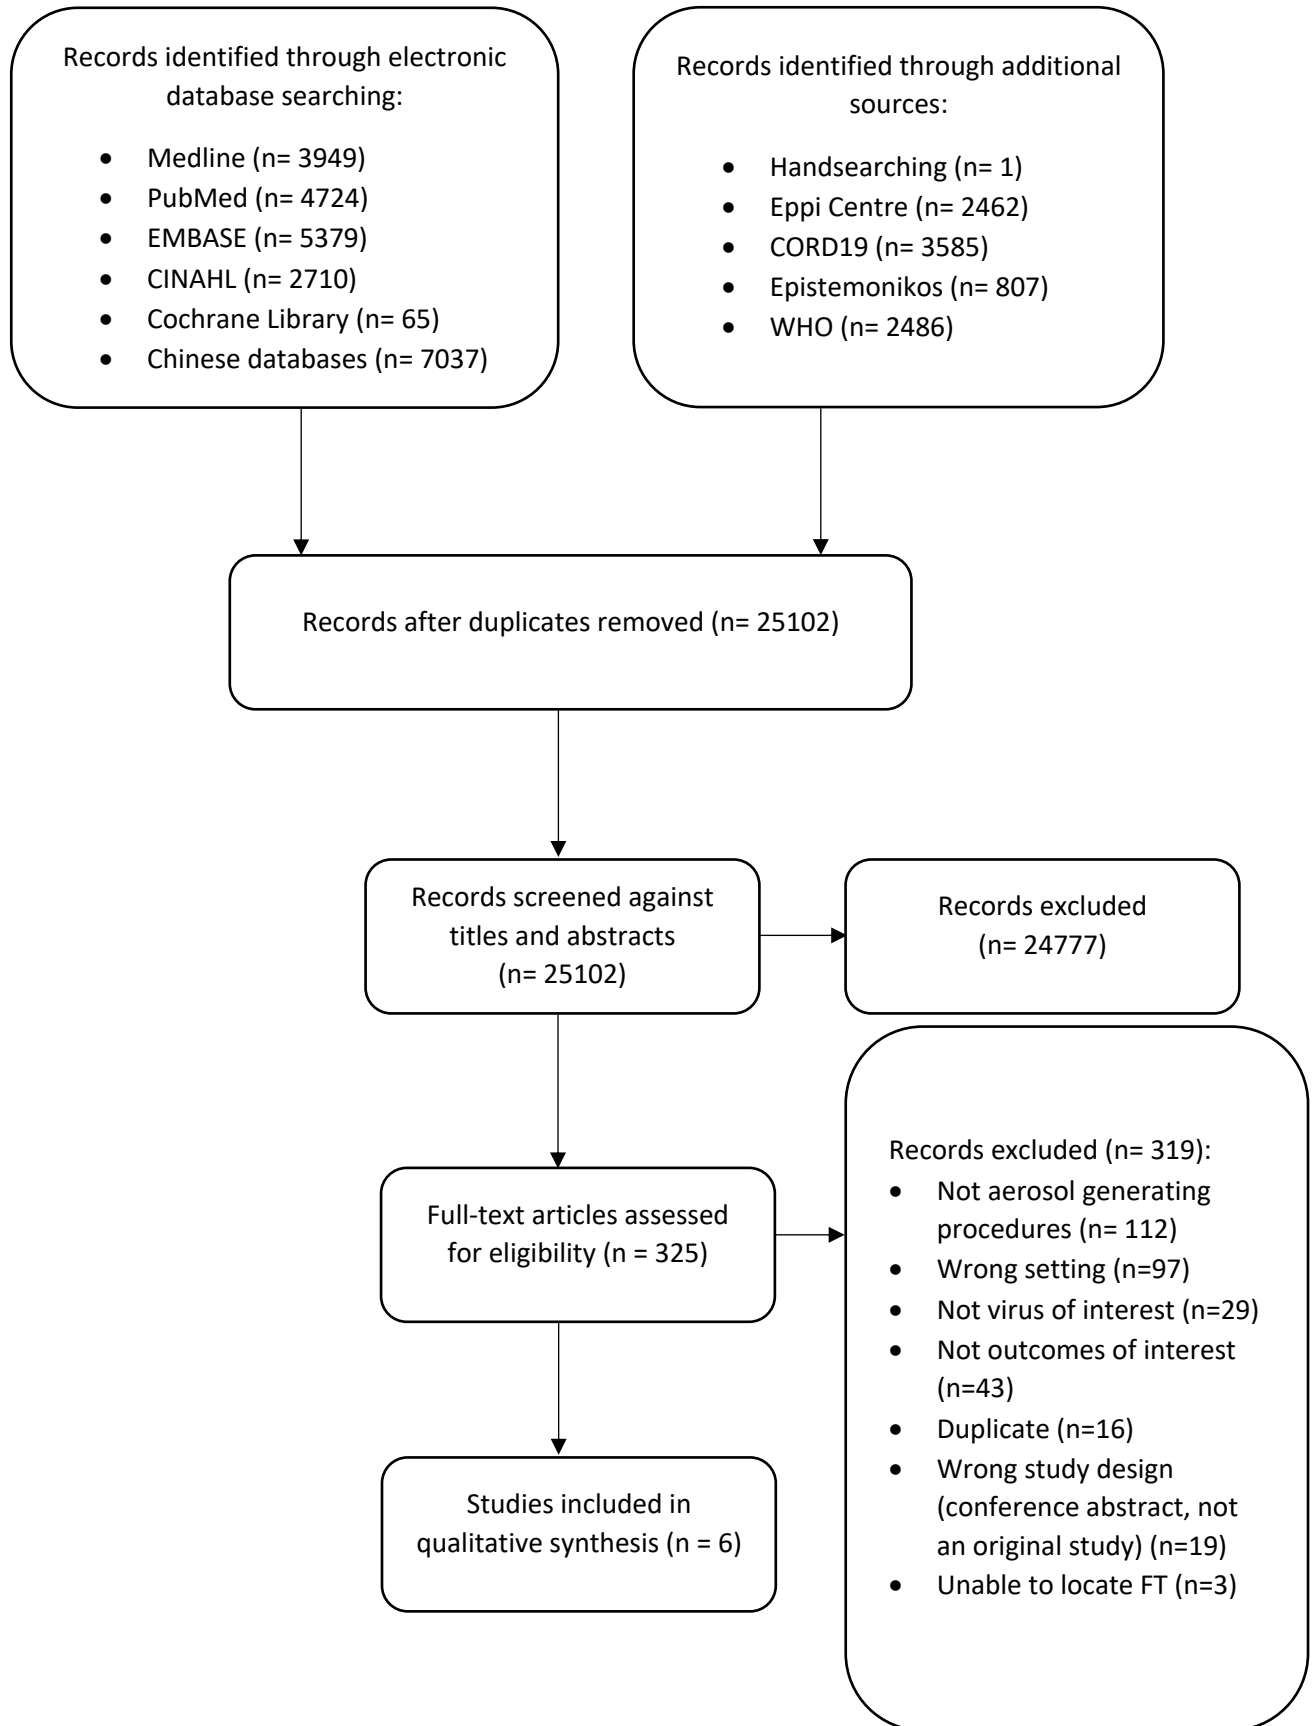

Supplement 3. Stream 4 PRISMA Flow Chart

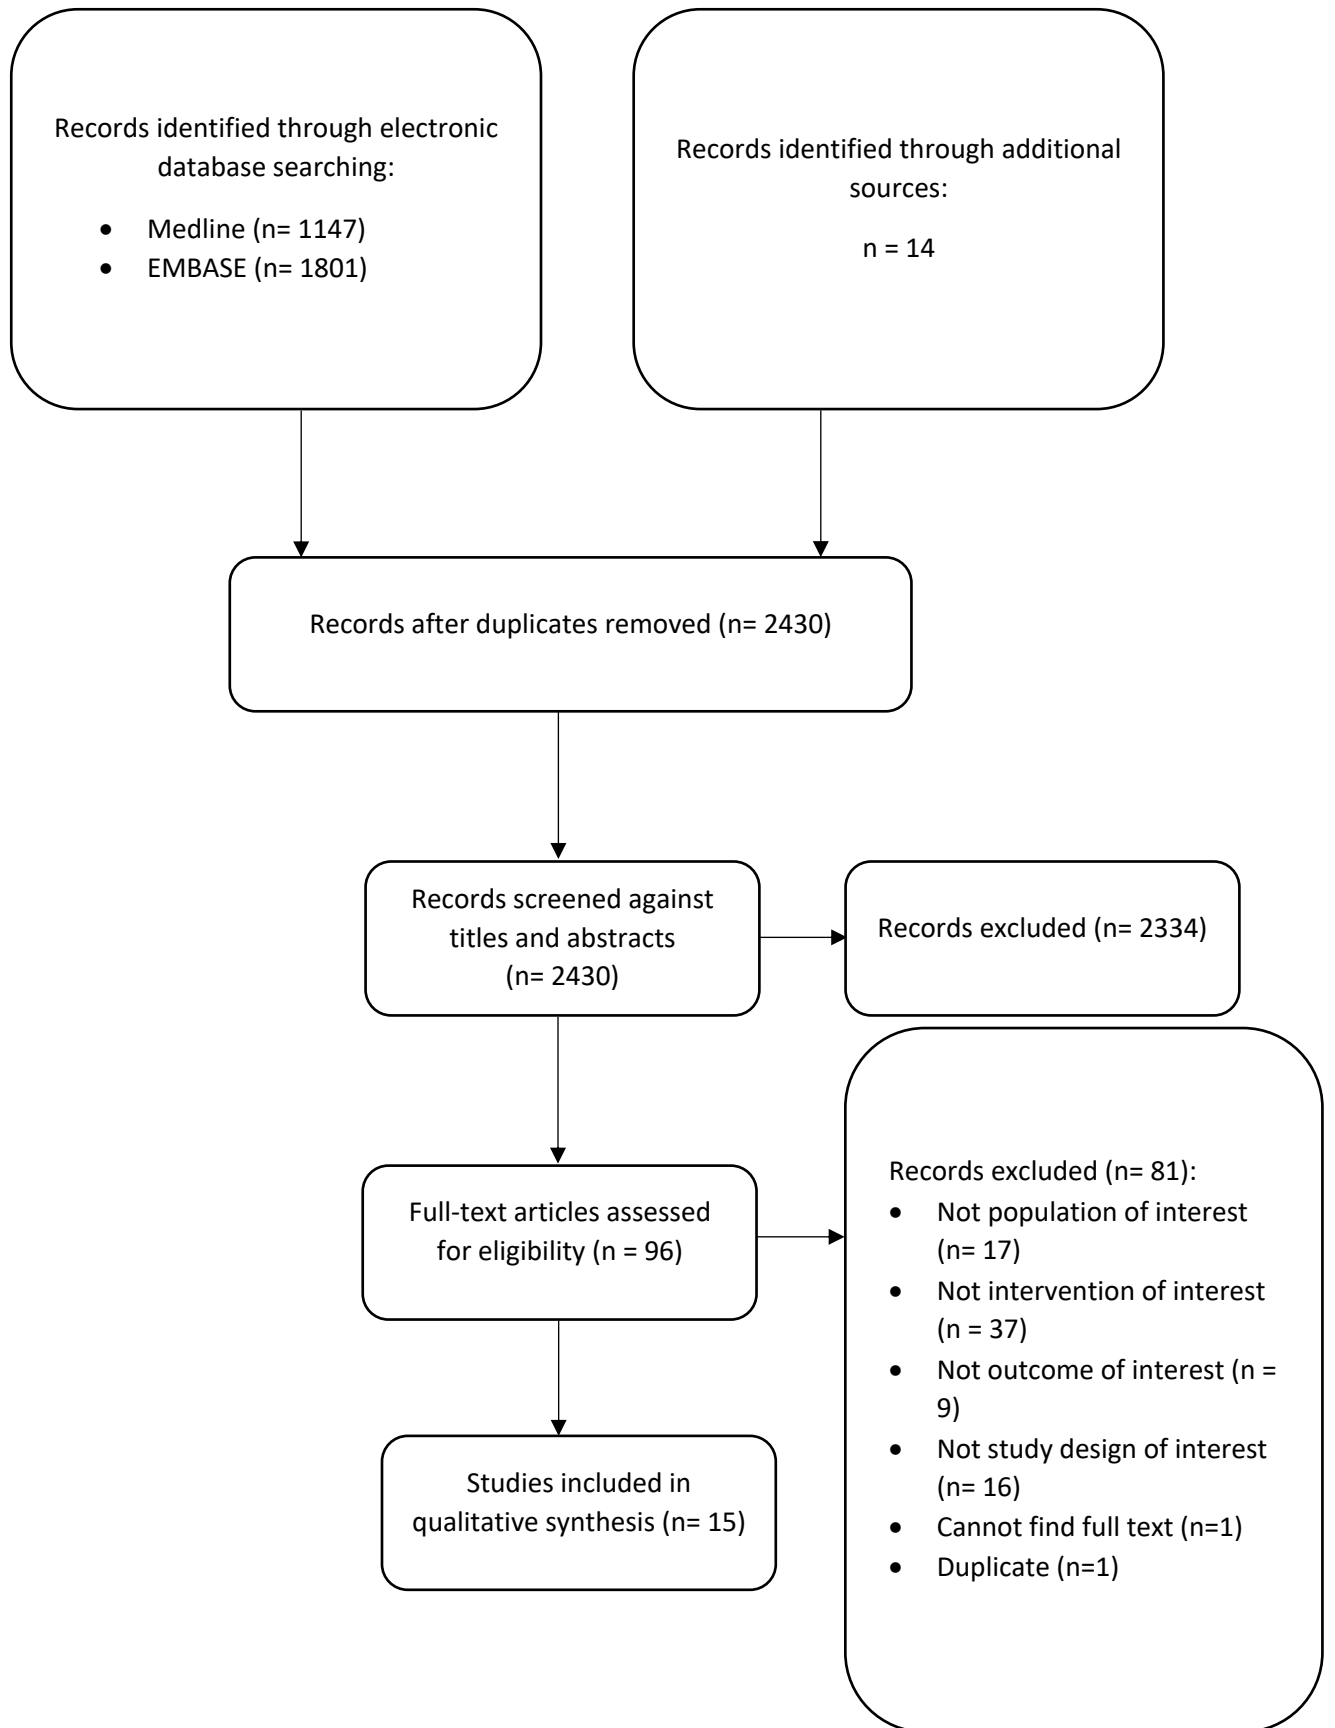

Supplement 4. Baseline characteristics of eligible studies excluded from the analysis (n=95)

| Study ID           | Study design for interventions | Country       | Virus    | Interventions                | Risk of bias                                        |
|--------------------|--------------------------------|---------------|----------|------------------------------|-----------------------------------------------------|
| Zhang 2020(1)      | Retrospective cases            | China         | COVID-19 | MV (NIV, IMV)                | 5/9; concern related to comparability and outcome   |
| Yang 2020(2)       | Retrospective cases            | China         | COVID-19 | IMV                          | 7/9; concern related to comparability               |
| Wong 2003(3)       | Case study                     | China         | SARS     | IMV                          | 6/9; concern related to selection and comparability |
| Zhong 2004(4)      | Case study                     | China         | SARS     | NIV                          | Insufficient information to make an assessment      |
| Zheng 2020(5)      | Retrospective cases            | China         | COVID-19 | IMV                          | 5/9; concern related to comparability and outcome   |
| Zhao 2003(6)       | Cohort                         | China         | SARS     | NIV, IMV                     | 5/9; concern related to comparability and outcome   |
| Liu 2020(7)        | Case control                   | China         | COVID-19 | NIV, Standard oxygen therapy | 5/9; concern related to comparability and selection |
| Liu 2005(8)        | Cohort                         | Taiwan        | SARS     | IMV, Standard oxygen therapy | 6/9; concern related to selection and comparability |
| Lien 2008(9)       | Case series                    | Taiwan        | SARS     | IMV                          | 6/9; concern related to selection and comparability |
| Khalid 2016(10)    | Single arm study               | Saudi Arabia  | MERS     | NIV                          | 6/9; concern related to selection and comparability |
| Han 2004(11)       | Single arm study               | China         | SARS     | NIV                          | 6/9; concern related to selection and comparability |
| Halim 2016(12)     | Cohort                         | Saudia Arabia | MERS     | IMV                          | 6/9; concern related to selection and comparability |
| Guan 2020(13)      | Cohort                         | China         | COVID-19 | NIV, IVM                     | 6/9; concern related to selection and comparability |
| Gomersall 2004(14) | Cohort                         | China         | SARS     | MV, no MV                    | 6/9; concern related to selection and comparability |
| Fowler 2003(15)    | Cohort                         | Canada        | SARS     | IMV                          | 6/9; concern related to selection and comparability |
| Cheung 2004(16)    | single arm cohort              | China         | SARS     | NIV                          | 6/9; concern related to selection and comparability |

|                     |                     |               |          |                                   |                                                              |
|---------------------|---------------------|---------------|----------|-----------------------------------|--------------------------------------------------------------|
| Bhatraju 2020(17)   | Case Series         | USA           | SARS     | IMV                               | 5/9; concern related to selection, comparability and outcome |
| Arabi 2014(18)      | Case Series         | Saudia Arabia | MERS     | IMV                               | 6/9; concern related to selection and comparability          |
| AlAhmadi 2017(19)   | Cohort              | Saudia Arabia | MERS     | NIV, IMV                          | 5/9; concern related to selection, comparability and outcome |
| Almekhlafi 2016(20) | Cohort              | Saudia Arabia | MERS     | NIV, IMV                          | 7/9; concern related to selection and comparability          |
| Xu 2020(21)         | Cohort              | China         | COVID-19 | NIV, IMV                          | 6/9; concern related to selection and comparability          |
| Shi 2020(22)        | Cohort              | China         | COVID-19 | Oxygen therapy, MV                | 7/9; concern related to comparability                        |
| Qi 2020(23)         | Cohort              | China         | COVID-19 | NIV, IMV, standard oxygen therapy | 6/9; concern related to selection and comparability          |
| Peiris 2003(24)     | Cohort              | China         | SARS     | IMV                               | 6/9; concern related to selection and comparability          |
| Liu 2020(25)        | Cohort              | China         | COVID-19 | NIV                               | 6/9; concern related to selection and comparability          |
| Fan H 2020(26)      | Cohort              | China         | COVID-19 | NIV, IMV, standard oxygen therapy | 6/9; concern related to selection and comparability          |
| Chen 2005(27)       | Cohort              | China         | SARS     | IMV                               | 6/9; concern related to selection and comparability          |
| Al-Dorzi 2016(28)   | Cohort              | Saudi Arabia  | MERS     | NIV, IMV                          | 6/9; concern related to selection and comparability          |
| Pan 2020(29)        | Case Series         | China         | COVID-19 | IMV                               | 5/9; concern related to comparability and outcome            |
| Chen 2020(30)       | Case-control        | China         | COVID-19 | NIV, IMV, Standard oxygen therapy | 6/9; concern related to selection and comparability          |
| Mo 2020(31)         | retrospective study | China         | COVID-19 | IMV, standard oxygen therapy      | 5/9; concern related to comparability and selection          |



|                 |                     |       |          |             |                                                                |
|-----------------|---------------------|-------|----------|-------------|----------------------------------------------------------------|
| Chen 2020(32)   | Retrospective study | China | COVID-19 | NIV, IMV    | 5/9; concern related to comparability and outcome              |
| Arentz 2020(33) | Retrospective study | USA   | COVID-19 | MV          | 6/9; concern related to selection and comparability            |
| Chen 2003(34)   | Case series         | China | SARS     | NIV         | 6/9; concern related to selection and comparability            |
| Han 2004(35)    | Case series         | China | SARS     | NIV         | 6/9; concern related to selection and comparability            |
| Zhao 2003(36)   | Cohort              | China | SARS     | NIV         | 6/9; concern related to selection and comparability            |
| Yang 2003(37)   | Cohort              | China | SARS     | NIV, no MV  | 6/9; concern related to selection and comparability            |
| Li 2003(38)     | Retrospective study | China | SARS     | NIV         | 6/9; concern related to selection and comparability            |
| Liu 2007(39)    | Case series         | China | SARS     | NIV         | 6/9; concern related to selection and comparability            |
| Gong 2003(40)   | Case series         | China | SARS     | NIV, IMV    | 6/9; concern related to selection and comparability            |
| Xu 2003(41)     | Retrospective study | China | SARS     | NIV         | 6/9; concern related to selection and comparability            |
| Chan 2003(42)   | Retrospective study | China | SARS     | IMV         | 6/9; concern related to selection and comparability            |
| Lu 2003(43)     | Case Series         | China | SARS     | NIV         | 2/9; concern related to comparability, selection, and exposure |
| Zhao W 2003(44) | Case Series         | China | SARS     | NIV, no NIV | 5/9; concern related to comparability, selection               |
| Xiao F 2004(45) | EtD (cost)          | China | SARS     | NIV, no MV  | N/A                                                            |
| Bai YH 2003(46) | Case series         | China | SARS     | IMV         | 6/9; concern related to selection and comparability            |
| Yu 2005(47)     | Case Series         | China | SARS     | IMV         | 5/9; concern related to comparability, selection               |

|                   |             |       |      |                         |                                                                |
|-------------------|-------------|-------|------|-------------------------|----------------------------------------------------------------|
| Zeng QL 2003(48)  | Cohort      | China | SARS | NIV                     | 6/9; concern related to selection and comparability            |
| Zhang K 2003(49)  | Case Series | China | SARS | NIV                     | 5/9; concern related to comparability, selection               |
| Ye H 2003(50)     | case series | China | SARS | NIV, IMV                | 6/9; concern related to selection and comparability            |
| Wu X 2003(51)     | Case Series | China | SARS | NIV                     | 4/9; concern related to comparability, selection, and outcome  |
| Liu JL 2003(52)   | Case series | China | SARS | NIV                     | 1/9; concern related to selection, comparability, and exposure |
| Zhao S(53)        | Case series | China | SARS | NIV                     | 3/9; concern related to selection, comparability, and exposure |
| Ou XY 2004(54)    | Cohort      | China | SARS | NIV, IMV                | 6/9; concern related to selection and comparability            |
| Zhang JH 2003(55) | Case series | China | SARS | NIV                     | 4/9; concern related to selection and comparability            |
| Yang Q 2003(56)   | Case series | China | SARS | IMV                     | 4/9; concern related to selection and comparability            |
| Chen SB 2003(57)  | Cohort      | China | SARS | NIV, IMV                | 7/9; concern related to comparability                          |
| He WQ 2003(58)    | Case series | China | SARS | MV, NIV → IMV           | 6/9; concern related to selection and comparability            |
| Cao CY 2003(59)   | Case series | China | SARS | Standard oxygen therapy | 4/9; concern related to selection, comparability, and outcome  |
| Han CH 2007(60)   | Case series | China | SARS | NIV                     | 3/9; concern related to selection, comparability, and exposure |
| Zhang AZ 2004(61) | Case series | China | SARS | NIV                     | 6/9; concern related to selection and comparability            |
| Zhang J 2003(62)  | Case series | China | SARS | NIV                     | 5/9; concern related to selection, comparability, and exposure |

|                   |             |       |          |                |                                                                |
|-------------------|-------------|-------|----------|----------------|----------------------------------------------------------------|
| Zhang ZY 2005(63) | Case series | China | SARS     | NIV, NIV → IMV | 6/9; concern related to selection and comparability            |
| Zhang ZC 2003(64) | Case series | China | SARS     | IMV            | 5/9; concern related to selection, comparability, and exposure |
| Ma JY 2003(65)    | Case series | China | SARS     | NIV            | 2/9; concern related to selection, comparability, and exposure |
| Liu 2003(66)      | Case series | China | SARS     | NIV            | 6/9; concern related to selection and comparability            |
| Liu YF 2004(67)   | Case series | China | SARS     | NIV            | 6/9; concern related to selection and comparability            |
| Wan SI 2003(68)   | Case series | China | SARS     | NIV            | 6/9; concern related to selection and comparability            |
| Liu QG 2003(69)   | Case series | China | SARS     | IMV            | 5/9; concern related to selection and comparability            |
| Wei HG 2013(70)   | Case series | China | SARS     | NIV            | 2/9; concern related to selection, comparability, and exposure |
| Chen HW 2003(71)  | Case series | China | SARS     | NIV            | 4/9; concern related to selection, comparability, and exposure |
| Xu YD 2003(72)    | Case series | China | SARS     | NIV, NIV → IMV | 4/9; concern related to selection, comparability, and exposure |
| Yu XC 2003(73)    | Case series | China | SARS     | NIV            | 6/9; concern related to selection and comparability            |
| Meng Y 2004(74)   | Case series | China | SARS     | NIV            | 6/9; concern related to selection and comparability            |
| Yang ZP 2004(75)  | Case series | China | SARS     | NIV            | 6/9; concern related to selection and comparability            |
| Gritti 2020(76)   | Case series | China | COVID-19 | NIV            | 6/9; concern related to selection and comparability            |
| Barrasa 2020(77)  | Case series | Spain | COVID-19 | MV             | 6/9; concern related to selection and comparability            |

|                     |             |         |          |                                         |                                                               |
|---------------------|-------------|---------|----------|-----------------------------------------|---------------------------------------------------------------|
| Geng 2020(78)       | Case series | China   | COVID-19 | HFNC                                    | 6/9; concern related to selection and comparability           |
| Liang 2020(79)      | Case series | China   | COVID-19 | IMV                                     | 6/9; concern related to selection and comparability           |
| Ling 2020(80)       | Case series | China   | COVID-19 | IMV                                     | 6/9; concern related to selection and comparability           |
| Pedersen 2020(81)   | Case series | Denmark | COVID-19 | IMV                                     | 6/9; concern related to selection and comparability           |
| Yao 2020(82)        | Case series | China   | COVID-19 | NIV, HFNC                               | 3/9; concern related to selection, comparability, and outcome |
| Piva 2020(83)       | Case series | Italy   | COVID-19 | NIV, IMV                                | 5/9; concern related to selection, comparability, and outcome |
| Xie 2020(84)        | Case series | China   | COVID-19 | NIV, IMV, HFNO, standard oxygen therapy | 1/9; concern related to selection, comparability, and outcome |
| Chen 2020(85)       | Case series | China   | COVID-19 | IMV, HFNC                               | 5/9; concern related to comparability and outcome             |
| Wang 2020(86)       | Case series | China   | COVID-19 | IMV, NIV                                | 5/9; concern related to selection and comparability           |
| Argenziano 2020(87) | Case series | USA     | COVID-19 | MV                                      | 4/9; concern related to comparability and outcome             |
| Grasselli 2020(88)  | Case series | Italy   | COVID-19 | IMV, NIV, standard oxygen therapy       | 2/9; concern related to selection, comparability, and outcome |
| Wang 2020(89)       | Case series | China   | COVID-19 | HFNC, NIV, IMV                          | 7/9; concern related to comparability                         |
| Docherty 2020(90)   | Case series | England | COVID-19 | IMV                                     | 6/9; concern related to selection and comparability           |
| He GJ 2020(91)      | Case series | China   | COVID-19 | NIV                                     | 5/9; concern related to selection, comparability and outcome  |
| Chen XL 2003(92)    | Case series | China   | SARS     | NIV                                     | 4/9; concern related to selection, comparability and outcome  |

|                  |             |       |          |          |                                                              |
|------------------|-------------|-------|----------|----------|--------------------------------------------------------------|
| Zhao YY 2020(93) | Case series | China | COVID-19 | NIV, IMV | 4/9; concern related to selection, comparability and outcome |
| Lin Y 2020(94)   | Case series | China | COVID-19 | NIV, IMV | 3/9; concern related to selection, comparability and outcome |
| Yang Y 2020(95)  | Case series | China | COVID-19 | HFNC     | 5/9 concern related to selection, comparability and outcome  |

HFNO: high flow oxygenation. HFNC: high flow nasal cannula. IMV: invasive mechanical ventilation. NIV: noninvasive ventilation. \*Risk of bias per outcome for randomized studies was assessed using the Cochrane Risk of Bias tool 2.0 (overall risk of bias rating is presented here); risk of bias for non-randomized studies was assessed using the Newcastle-Ottawa scale (overall rating is presented here; with indication of domains of concern), risk of bias for studies addressing Evidence to Decision (EtD) outcomes (i.e., acceptability, feasibility, equity, resources and cost, value and preferences) was not assessed (reported as N/A).

1. Zhang L, Zhu F, Xie L, Wang C, Wang J, Chen R, et al. Clinical characteristics of COVID-19-infected cancer patients: A retrospective case study in three hospitals within Wuhan, China. *Annals of Oncology*. 2020;26:26.
2. Yang X, Yu Y, Xu J, Shu H, Xia J, Liu H, et al. Clinical course and outcomes of critically ill patients with SARS-CoV-2 pneumonia in Wuhan, China: a single-centered, retrospective, observational study. *The Lancet Respiratory Medicine*. 2020;24:24.
3. Wong P, Mak S, Lo K, Tong GMW, Wong Y, Watt C, et al. Clinical presentation and outcome of severe acute respiratory syndrome in dialysis patients. *American Journal of Kidney Diseases*. 2003;42(5):1075-81.
4. Zhong N. Management and prevention of SARS in China. *Philosophical Transactions of the Royal Society of London - Series B: Biological Sciences*. 2004;359(1447):1115-6.
5. Zheng F, Liao C, Fan QH, Chen HB, Zhao XG, Xie ZG, et al. Clinical Characteristics of Children with Coronavirus Disease 2019 in Hubei, China. *Current Medical Science*. 2020;24:24.
6. Zhao Z, Zhang F, Xu M, Huang K, Zhong W, Cai W, et al. Description and clinical treatment of an early outbreak of severe acute respiratory syndrome (SARS) in Guangzhou, PR China. *Journal of medical microbiology*. 2003;52(8):715-20.
7. Liu W, Tao ZW, Lei W, Ming-Li Y, Kui L, Ling Z, et al. Analysis of factors associated with disease outcomes in hospitalized patients with 2019 novel coronavirus disease. *Chinese Medical Journal*. 2020;28:28.
8. Liu CY, Huang LJ, Lai CH, Chen HP, Chen TL, Fung CP. Clinical characteristics, management and prognostic factors in patients with probable severe acute respiratory syndrome (SARS) in a SARS center in Taiwan. *Journal of the Chinese Medical Association: JCMSA*. 2005;68(3):110-7.
9. Lien T, Sung C, Lee C, Kao H, Huang Y, Liu C, et al. Characteristic features and outcomes of severe acute respiratory syndrome found in severe acute respiratory syndrome intensive care unit patients. *Journal of Critical Care*. 2008;23(4):557-64.
10. Khalid I, Alraddadi BM, Dairi Y, Khalid TJ, Kadri M, Alshukairi AN, et al. Acute Management and Long-Term Survival Among Subjects With Severe Middle East Respiratory Syndrome Coronavirus Pneumonia and ARDS. *Respiratory Care*. 2016;61(3):340-8.
11. Han F, Jiang YY, Zheng JH, Gao ZC, He QY. Noninvasive positive pressure ventilation treatment for acute respiratory failure in SARS. *Sleep & Breathing*. 2004;8(2):97-106.
12. Halim AA, Alsayed B, Embarak S, Yaseen T, Dabbous S. Clinical characteristics and outcome of ICU admitted MERS corona virus infected patients. *Egyptian Journal of Chest Diseases and Tuberculosis*. 2016;65(1):81-7.
13. Guan WJ, Ni ZY, Hu Y, Liang WH, Ou CQ, He JX, et al. Clinical Characteristics of Coronavirus Disease 2019 in China. *New England Journal of Medicine*. 2020;28:28.
14. Gomersall CD, Joynt GM, Lam P, Li T, Yap F, Lam D, et al. Short-term outcome of critically ill patients with severe acute respiratory syndrome. *Intensive Care Medicine*. 2004;30(3):381-7.
15. Fowler RA, Lapinsky SE, Hallett D, Detsky AS, Sibbald WJ, Slutsky AS, et al. Critically ill patients with severe acute respiratory syndrome. *JAMA*. 2003;290(3):374-80. doi: 10.1001/jama.290.3.374.
16. Cheung TM, Yam LY, So LK, Lau AC, Poon E, Kong BM, et al. Effectiveness of noninvasive positive pressure ventilation in the treatment of acute respiratory failure in severe acute respiratory syndrome. *Chest*. 2004;126(3):845-50.
17. Bhatraju PK, Ghassemieh BJ, Nichols M, Kim R, Jerome KR, Nalla AK, et al. Covid-19 in Critically Ill Patients in the Seattle Region - Case Series. *New England Journal of Medicine*. 2020;30:30.
18. Arabi YM, Arifi AA, Balkhy HH, Najm H, Aldawood AS, Ghabashi A, et al. Clinical course and outcomes of critically ill patients with Middle East respiratory syndrome coronavirus infection. *Annals of Internal Medicine*. 2014;160(6):389-97.
19. Al Ahmadi M, Al Mutairi H, Al Qasim E, Biostat JJ, Nasim M, Arabi YM, et al. Critically Ill Patients With the Middle East Respiratory Syndrome: A Multicenter Retrospective Cohort Study. *Critical Care Medicine*. 2017;45(10):1683-95.
20. Almekhlafi GA, Albarrak MM, Mandourah Y, Hassan S, Alwan A, Abudayah A, et al. Presentation and outcome of Middle East respiratory syndrome in Saudi intensive care unit patients. *Critical Care (London, England)*. 2016;20(1):123.

21. Xu Y, Xu Z, Liu X, Cai L, Zheng H, Huang Y, et al. Clinical findings in critical ill patients infected with SARS-Cov-2 in Guangdong Province, China: a multi-center, retrospective, observational study. medRxiv. 2020.
22. Shi Q, Zhao K, Yu J, Feng J, Zhao K, Zhang X, et al. Clinical characteristics of 101 non-surviving hospitalized patients with COVID-19: A single center, retrospective study. medRxiv. 2020.
23. Qi D, Yan X, Tang X, Peng J, Yu Q, Feng L, et al. Epidemiological and clinical features of 2019-nCoV acute respiratory disease cases in Chongqing municipality, China: a retrospective, descriptive, multiple-center study. medRxiv. 2020.
24. Peiris JSM, Chu CM, Cheng VCC, Chan KS, Hung IFN, Poon LLM, et al. Clinical progression and viral load in a community outbreak of coronavirus-associated SARS pneumonia: a prospective study. *The Lancet*. 2003.
25. Liu L, Gao J, Hu W, Zhang X, Guo L. Clinical characteristics of 51 patients discharged from hospital with COVID-19 in Chongqing, China. medRxiv. 2020.
26. Fan H, Zhang L, Huang B, Zhu M, Zhou Y, Yu W, et al. Retrospective Analysis of Clinical Features in 101 Death Cases with COVID-19. medRxiv. 2020.
27. Chen C-Y, Lee C-H, Liu C-Y, Wang J-H, Wang L-M, Perng R-P. Clinical Features and Outcomes of Severe Acute Respiratory Syndrome and Predictive Factors for Acute Respiratory Distress Syndrome. *Journal of the Chinese Medical Association*. 2005.
28. Al-Dorzi HM, Aldawood AS, Khan R, Baharoon S, Alchin JD, Matroud AA, et al. The critical care response to a hospital outbreak of Middle East respiratory syndrome coronavirus (MERS-CoV) infection: an observational study. *Ann Intensive Care*. 2016.
29. Pan C, Chen L, Lu C, Zhang W, Xia J-A, Sklar MC, et al. Lung Recruitability in SARS-CoV-2 Associated Acute Respiratory Distress Syndrome: A Single-center, Observational Study. *American journal of respiratory and critical care medicine*. 2020.
30. Chen T, Wu D, Chen H, Yan W, Yang D, Chen G, et al. Clinical characteristics of 113 deceased patients with coronavirus disease 2019: retrospective study. *BMJ*. 2020;368:m1091-m.
31. Mo P, Xing Y, Xiao Y, Deng L, Zhao Q, Wang H, et al. Clinical characteristics of refractory COVID-19 pneumonia in Wuhan, China. *Clinical Infectious Diseases*. 2020;16:16.
32. Chen N, Zhou M, Dong X, Qu J, Gong F, Han Y, et al. Epidemiological and clinical characteristics of 99 cases of 2019 novel coronavirus pneumonia in Wuhan, China: a descriptive study. *Lancet*. 2020;395(10223):507-13.
33. Arentz M, Yim E, Klaff L, Lokhandwala S, Riedo FX, Chong M, et al. Characteristics and Outcomes of 21 Critically Ill Patients With COVID-19 in Washington State. *JAMA*. 2020.
34. Chen H, Wang XP, Li F, Yang Q, Zhang LG, Du JX, et al. [Evaluation of noninvasive positive pressure ventilation in treatment for patients with severe acute respiratory syndrome]. *Chinese Critical Care Medicine*. 2003;15(10):585-8.
35. Han F, Jiang YY, Zheng JH, Hu Z, Gao ZC, He QY, et al. [Acute respiratory failure and noninvasive positive pressure ventilation treatment in patients with severe acute respiratory syndrome]. *Chinese Journal of Tuberculosis & Respiratory Diseases*. 2004;27(9):593-7.
36. Zhao ZW, Zhang FC, Xu M, Huang K, Zhong WN, Cai WP, et al. [Clinical analysis of 190 cases of outbreak with atypical pneumonia in Guangzhou in spring, 2003]. *Chung-Hua i Hsueh Tsa Chih [Chinese Medical Journal]*. 2003;83(9):713-8.
37. Yang ZC, Peng BB, Zhang Y, Zhang JP. [Treatment experiences in 63 patients with severe acute respiratory syndrome:a retrospective analysis]. *Chinese Critical Care Medicine*. 2003;15(11):697.
38. Li H, Nie L, Wang G, Que C, Ma J, Li N, et al. [Clinical observation of non-invasive positive pressure ventilation (NIPPV) in the treatment of severe acute respiratory syndrome (SARS)]. *Journal of Peking University*. 2003;35 Suppl:41-3.
39. Liu CZ, Cheng GY, Wang RG, Liu Y. Dynamics changes of pulmonary lesions on CT in patients with severe acute respiratory syndrome treated by non-invasive positive pressure ventilation. *Chinese Journal of Radiology*. 2007;41(5):479-82.
40. Gong ZY, Huang YG, Wang JJ, Xu Q, Li Y, Yu XR, et al. [Evaluation of tracheal intubation in critical SARS patients]. *Chung-Kuo i Hsueh Ko Hsueh Yuan Hsueh Pao Acta Academiae Medicinae Sinicae*. 2003;25(5):550-2.
41. Xu YD, Li YM, Liu XQ, Chen SB, He WQ, Xiao ZL, et al. [Clinical therapy of severe acute respiratory syndrome: 38 cases retrospective analysis]. *Chinese Critical Care Medicine*. 2003;15(6):343-5.

42. Chan JW, Ng CK, Chan YH, Mok TY, Lee S, Chu SY, et al. Short term outcome and risk factors for adverse clinical outcomes in adults with severe acute respiratory syndrome (SARS). *Thorax*. 2003;58(8):686-9.
43. Lu W, Zhang H, Wang F, Wang S, Wu X, Zhang N, et al. Preliminary analysis of treatment in 32 patients with critical severe acute respiratory syndrome. *Chinese Critical Care Medicine*. 2003;15(8).
44. Zhao W, Pan H, Liu W, Zhao H, Shen L, Lu C, et al. Clinical diagnosis and treatment of infectious atypical pneumonia. *Jiangsu Medicine*. 2003;29(12).
45. Xiao F, Chen B, Wu Y, Wang Y, Han D. Analysis of hospitalization expenses and influencing factors of clinically diagnosed SARS cases in Beijing. *Chinese Journal of Epidemiology*. 2004;25(4).
46. Bai Y, Guo X, Huang Y, Allen L, Ye T, Ren H. Invasive mechanical ventilation for severe SARS. *Basic Medicine and Clinical*. 2004;24(3).
47. Wang Y, Ling W, Jiao Y, Fan X. Analysis of blood gas results of patients with severe SARS treated with high-frequency oscillatory ventilation. *Chinese Journal of Modern Internal Medicine*. 2005;2(3).
48. Zeng Q, Li G, Tan Z, Zhang G, Chen G, Zhang B, et al. Noninvasive Positive Pressure Ventilation and Intravenous Oxygen Treatment for 36 Cases of Severe Critical SARS. *Chinese Emergency Medicine*. 2003;23(8).
49. Zhang J, Han S, Liu D, Wang S, Yang J, Yin Y, et al. Experience in the treatment of SARS patients: report of 2 cases. *Journal of Jilin University (Medical Edition)*. 2003;29(4).
50. Ye H, Liu Y, Zhang P. Clinical study on rescuing 7 cases of severe infectious atypical pneumonia with mechanical ventilation. *Chinese Emergency Medicine*. 2003;23(8).
51. Wu X, Wang Y. Analysis of offline factors of noninvasive positive pressure ventilation in four cases of severe SARS. *Tianjin Pharmaceutical*. 2003(10):653-5.
52. Li J. Clinical observation of noninvasive positive pressure ventilation for SARS. *Chinese Medical Digest Internal Medicine*. 2003(06):673.
53. Zhao S, Chen H, Li W, Wang X, Xing X, Chen X, editors. Clinical analysis of 5 patients with severe infectious atypical pneumonia treated by noninvasive mechanical ventilation 2003; Hangzhou, Zhejiang, China.
54. Ou X. Treatment of infectious atypical pneumonia complicated with acute respiratory distress syndrome. *Journal of Rare Diseases*. 2004;11(6).
55. Zhang J. Clinical Observation of NIPPV Therapeutic Effect and Complications in Patients with Severe SARS. *Journal of China-Japan Friendship Hospital*. 2003;17(5).
56. Yang Q. Summary of 8 cases of severe acute respiratory syndrome patients with invasive mechanical ventilation. *Journal of Capital Medical University*. 2003;24(4).
57. Chen S. Nasal mask continuous positive airway pressure treatment for severe SARS. *Guangdong Medicine*. 2003(z1).
58. Liu X, Chen S, Xu Y, Liang J, Li Y. Clinical analysis of SARS combined with ARDS. *Guangdong Medicine*. 2003;24(z1):95-6.
59. Cao C, Wei Z, Xu J, Zhang J, Gao H. Analysis of repeated illness in 3 SARS patients. *Medical Journal of the Chinese People's Armed Police*. 2003;14(7):434.
60. Han C, Ma L, Li H, Wang L, Zhang Z. Clinical study of ventilator treatment for severe SARS patients. *Journal of Taishan Medical College*. 2007;28(8).
61. Zhang A. Evaluation of the efficacy of high-frequency ventilator in the treatment of severe SARS patients. *Clinical Medicine Practice*. 2004;13(8).
62. Zhang J, Guo S. Retrospective study of severe SARS noninvasive ventilation barotrauma. *Chinese Journal of Clinical Medicine (Beijing)*. 2003(12).
63. Zhang Z, Luo H, Zhao A, Wang L, Zheng Z, Bi H, et al. Treatment of severe acute respiratory syndrome with non-invasive nasal / mask ventilation. *Shanxi Medical Journal*. 2005;34(1).
64. Zhang Z. Clinical analysis of 20 cases of severe SARS patients with tracheal intubation. *Chinese Clinician*. 2003;31.
65. Ma J, Zhao Z, Sun W, Li Z, Wang Y. Clinical analysis of 33 cases of severe acute respiratory syndrome (SARS). *Journal of intractable diseases*. 2003;2(4).
66. Liu R. Non-invasive ventilator treatment for SARS patients. *Capital Medicine*. 2003(14).
67. Liu Y. Analysis of clinical treatment of 26 SARS patients. *China Critical Care Emergency Medicine*. 2004;16(5).
68. Wan X, Zeng F, Kuang X, Dunsilon. Nursing Care of Severe Infectious Atypical Pneumonia Treated by Double Airway Positive Pressure Ventilation. *Chinese Journal of Nursing*. 2003;38(7).



69. Liu Q, Cao W, Feng L, Sun L, editors. Clinical analysis of 6 cases of pneumothorax caused by mechanical ventilation in SARS patients 2003; Hangzhou, Zhejiang, China.
70. Wei H. Observation on the therapeutic effect of noninvasive positive pressure ventilation on SARS. *Journal of Cardiology of Integrated Chinese and Western Medicine (electronic version)*. 2013;1(2).
71. Chen H. Thinking about the timing of noninvasive positive pressure ventilation for SARS. *Journal of Capital Medical University*. 2003;24(4).
72. Xu Y. Retrospective analysis of clinical treatment of 38 severe SARS patients. *China Critical Care Emergency Medicine*. 2003;15(6).
73. Yu X. Application of nasal mask continuous positive airway pressure in the treatment of severe SARS. *Guangzhou Medicine*. 2003;34(5).
74. Meng Y, Luo Y, Liu L. Clinical observation of BiPAP in the treatment of severe SARS. *Chinese Medical Series*. 2004;4(3):5-6.
75. Yang Z, Qu Y, editors. Noninvasive positive pressure ventilation for the treatment of infectious atypical pneumonia respiratory failure 2004.
76. Gritti G, Federico R, Diego R, Ivano R, Granceso L. Use of siltuximab in patients with COVID-19 pneumonia requiring ventilatory support. *medRxiv*. 2020.
77. Barrasa H, Rello J, Tejada S, Martin A, Balziskueta G, Vinuesa C, et al. SARS-Cov-2 in Spanish Intensive Care: Early Experience with 15-day Survival In Vitoria. *Anaesth Crit Care Pain Med*. 2020;09:09.
78. Geng S, Mei Q, Zhu C, Yang T, Yang Y, Fang X, et al. High flow nasal cannula is a good treatment option for COVID-19. *Heart Lung*. 2020;11:11.
79. Liang WH, Guan WJ, Li CC, Li YM, Liang HR, Zhao Y, et al. Clinical characteristics and outcomes of hospitalised patients with COVID-19 treated in Hubei (epicenter) and outside Hubei (non-epicenter): A Nationwide Analysis of China. *Eur Respir J*. 2020;08:08.
80. Ling L, So C, Shum HP, Chan PKS, Lai CKC, Kandamby DH, et al. Critically ill patients with COVID-19 in Hong Kong: a multicentre retrospective observational cohort study. *Crit Care Resusc*. 2020;06:06.
81. Pedersen HP, Hildebrandt T, Poulsen A, Uslu B, Knudsen HH, Roed J, et al. Initial experiences from patients with COVID-19 on ventilatory support in Denmark. *Dan Med J*. 2020;67(5):27.
82. Yao W, Wang T, Jiang B, Gao F, Wang L, Zheng H, et al. Emergency tracheal intubation in 202 patients with COVID-19 in Wuhan, China: lessons learnt and international expert recommendations. *Br J Anaesth*. 2020;10:10.
83. Piva S, Filippini M, Turla F, Cattaneo S, Margola A, De Fulviis S, et al. Clinical presentation and initial management critically ill patients with severe acute respiratory syndrome coronavirus 2 (SARS-CoV-2) infection in Brescia, Italy. *J Crit Care*. 2020;58:29-33.
84. Xie J, Tong Z, Guan X, Du B, Qiu H. Clinical Characteristics of Patients Who Died of Coronavirus Disease 2019 in China. *JAMA Network Open*. 2020;3(4):e205619-e.
85. Chen Q, Zheng Z, Zhang C, Zhang X, Wu H, Wang J, et al. Clinical characteristics of 145 patients with corona virus disease 2019 (COVID-19) in Taizhou, Zhejiang, China. *Infection*. 2020;28(10):020-01432.
86. Wang D, Hu B, Hu C, Zhu F, Liu X, Zhang J, et al. Clinical Characteristics of 138 Hospitalized Patients With 2019 Novel Coronavirus-Infected Pneumonia in Wuhan, China. *JAMA: Journal of the American Medical Association*. 2020;323(11):1061-9.
87. Argenziano MG, Bruce SL, Slater CL, Tiao JR, Baldwin MR, Barr RG, et al. Characterization and Clinical Course of 1000 Patients with COVID-19 in New York: retrospective case series. *medRxiv*. 2020.
88. Grasselli G, Zangrillo A, Zanella A, Antonelli M, Cabrini L, Castelli A, et al. Baseline Characteristics and Outcomes of 1591 Patients Infected With SARS-CoV-2 Admitted to ICUs of the Lombardy Region, Italy. *Jama*. 2020;06:06.
89. Wang Y, Lu X, Chen H, Chen T, Su N, Huang F, et al. Clinical Course and Outcomes of 344 Intensive Care Patients with COVID-19. *Am J Respir Crit Care Med*. 2020.
90. Docherty AB, Harrison EM, Green CA, Hardwick HE, Pius R, Norman L, et al. Features of 16,749 hospitalised UK patients with COVID-19 using the ISARIC WHO Clinical Characterisation Protocol. 2020.
91. He G, Han Y, Fang Q, Zhou J, Sheng J, Li T, et al. Clinical experience of nasal high flow oxygen therapy applied to severe patients with coronavirus disease (COVID-19) in 2019. *Journal of Zhejiang University (Medical Edition)*. 2020:1-13.
92. Chen X, Huang Y, Li X, Feng L, Zhang J, Yao R, et al. Study on early warning of death outcome in severe SARS patients. Hangzhou. 2003. p. 149-50.

93. Zhao Y, Luo C, Jiang W, Qin M, Pan X. Nursing care of 4 severe coronavirus infection patients. *Guangxi Medicine*. 2020;42(06):741-4.
94. Lin Y, Gao C. Nursing care of critically ill patients infected by new coronavirus with oxygen therapy strategy. *Nursing and rehabilitation*. 2020;19(04):51-3.
95. Ye X, Zeng L, Lin L, Zhang Y, Ying W, Zhou X, et al. Nursing Care of 2 Patients with Severe Novel Coronavirus Pneumonia. *Journal of Nurse Training*. 2020:1-3.

## Supplement 5. Stream 1: Characteristics of included studies comparing different modalities of invasive and non-invasive ventilation

| Study, analyzed design, Number of patients, Virus (preprint if indicated) | Ventilation | Age (mean & SD or median & IQR/range) | Eligibility criteria if reported                                                                                | Degree of hypoxia based on PaO <sub>2</sub> /FiO <sub>2</sub> ratio                                                                                                                 | Comorbidities                                                                                                                                                                                                                                                                                                                  | Radiographic pattern/findings                                     | Risk of bias score (higher scores indicate lower risk of bias)* |
|---------------------------------------------------------------------------|-------------|---------------------------------------|-----------------------------------------------------------------------------------------------------------------|-------------------------------------------------------------------------------------------------------------------------------------------------------------------------------------|--------------------------------------------------------------------------------------------------------------------------------------------------------------------------------------------------------------------------------------------------------------------------------------------------------------------------------|-------------------------------------------------------------------|-----------------------------------------------------------------|
| Alraddadi 2019(21), Cohort (n = 302), Kingdom of Saudi Arabia, MERS       | NIV         | Median age 60 (50, 73)                | Patients with AHRF who required mechanical ventilation support in the ICU, whether invasively or noninvasively. | Median: PaO <sub>2</sub> /FiO <sub>2</sub> ratio 110 (62, 160), PaO <sub>2</sub> mmHg 63 (56, 74); PaCO <sub>2</sub> mmHg 39 (32, 47.4); HCO <sub>3</sub> mEq/L 23 (20, 24.7).      | 83.8% Any comorbidity; 59% Diabetes with chronic complications; 18.1% Chronic pulmonary disease (including asthma); 7.6% Chronic liver disease; 29.5% Chronic renal disease; 47.6% Chronic cardiac disease; 15.2% Chronic neurological disease; 1.9% Rheumatological disease; 9.5% Any malignancy; 4.8% Immunosuppressant use. | Number of quadrants with infiltrates on chest radiograph 2 (1, 4) | 8/9<br>No major concern                                         |
|                                                                           | IMV         | Median age 58 (45, 69)                | Patients with AHRF who required mechanical ventilation support in the ICU, whether invasively or noninvasively. | Median: PaO <sub>2</sub> /FiO <sub>2</sub> ratio 106 (68, 166), PaO <sub>2</sub> mmHg 71 (60, 87); PaCO <sub>2</sub> mmHg 43.5 (36, 51.1); HCO <sub>3</sub> mEq/L 21.7 (18.1, 24.9) | 83.2% Any comorbidity; 48.2% Diabetes with chronic complications; 10.7% Chronic pulmonary disease (including asthma); 5.6% Chronic liver disease; 34.5% Chronic renal disease; 39.6% Chronic cardiac disease; 8.6% Chronic neurological                                                                                        | Number of quadrants with infiltrates on chest radiograph 3 (2, 4) |                                                                 |

|                                                          |                                       |                                                |                                                                                                                                                                           |                                                               |                                                                                                                                                                                                                                                                |                                                                                                                                                                                                                                               |                                                                     |
|----------------------------------------------------------|---------------------------------------|------------------------------------------------|---------------------------------------------------------------------------------------------------------------------------------------------------------------------------|---------------------------------------------------------------|----------------------------------------------------------------------------------------------------------------------------------------------------------------------------------------------------------------------------------------------------------------|-----------------------------------------------------------------------------------------------------------------------------------------------------------------------------------------------------------------------------------------------|---------------------------------------------------------------------|
|                                                          |                                       |                                                |                                                                                                                                                                           |                                                               | disease; 2.5% Rheumatological disease; 10.7% Any malignancy; 7.6% Immunosuppressant use.                                                                                                                                                                       |                                                                                                                                                                                                                                               |                                                                     |
| Auld 2020(84), Cohort (n= 217), USA, COVID-19 (preprint) | Any IMV vs no IMV                     | Median (IQR) age 64 (54 – 73) in entire cohort | Not reported                                                                                                                                                              | Not reported                                                  | Baseline data available only for initial cohort with 217 pts:<br>Comorbidities n (%): Hypertension 134 (62), Congestive heart failure 41 (19), coronary artery disease 31 (14), diabetes mellitus 99 (46), renal diseases 58 (27), asthma 19 (9), COPD 21 (10) | Not reported                                                                                                                                                                                                                                  | 6/9<br>Concern related to selection and comparability of the groups |
| Booth 2003(23), Cohort (n = 144), Canada, SARS           | IMV & No MV (not separately reported) | Median (IQR) age 45 (34-57) in entire cohort   | Fever, a known exposure to SARS, and respiratory symptoms or infiltrates observed on chest radiograph. Patients were excluded if an alternative diagnosis was determined. | NR                                                            | Baseline data available only for initial cohort with 114 pts:<br>Comorbidities n (%): Diabetes 16 (11), Cardiac disease 12 (8) , Cancer 9 (6), COPD 2 (1), Chronic renal failure 2 (1)                                                                         | Chest radiography on admission was normal in 36 (25%) individuals, while unilateral and bilateral infiltrates were observed in 66 (46%) and 42 (29%) patients, respectively. (XR abnormalities distribution among the total study population) | 6/9<br>Concern related to selection and comparability of the groups |
| Chiang 2004(24), Cohort (14 patients), Taiwan, SARS      | IMV                                   | Age not reported                               | Absolute indication for tracheal intubation and mechanical ventilation, all patients requiring                                                                            | PaO <sub>2</sub> /FIO <sub>2</sub> ratio lower than 200 mmHg. | not reported                                                                                                                                                                                                                                                   | 100%                                                                                                                                                                                                                                          | 6/9<br>Concern related to selection and comparability of the groups |

|                                                             |                               |                        |                                                                                                                                                                                                    |                                               |              |              |                                                                                 |
|-------------------------------------------------------------|-------------------------------|------------------------|----------------------------------------------------------------------------------------------------------------------------------------------------------------------------------------------------|-----------------------------------------------|--------------|--------------|---------------------------------------------------------------------------------|
|                                                             |                               |                        | intubation had severe SARS which defined as PaO <sub>2</sub> /FIO <sub>2</sub> ratio less than 100 mm Hg, and a relative indication, PaO <sub>2</sub> /FIO <sub>2</sub> ratio of 100 to 200 mm Hg. |                                               |              |              |                                                                                 |
|                                                             | Standard Oxygen Therapy       | SARS, age not reported | Did not have severe SARS                                                                                                                                                                           | PaO <sub>2</sub> /FiO <sub>2</sub> > 200 mmHg | not reported | 100%         |                                                                                 |
| Choi 2016(25), Cohort (n = 186), South Korea, MERS          | IMV & Standard Oxygen Therapy | Not reported           | not reported                                                                                                                                                                                       | not reported                                  | not reported | not reported | 6/9<br>Concern related to selection and comparability of the groups             |
| Duca 2020(26), Cohort (n = 320), Italy, COVID-19 (preprint) | CPAP (Helmet)                 | Mean age 69 (+/- 11.5) | Hypoxic and/or dyspneic on 15 L/min nonrebreather mask                                                                                                                                             | Not reported                                  | Not reported | Not reported | 6/9<br>Concern related to the comparability of the groups and outcome follow-up |
|                                                             | NIV                           | Mean age 71 (+/- 12)   | Hypoxic and/or dyspneic on 15 L/min nonrebreather mask                                                                                                                                             | Not reported                                  | Not reported | Not reported |                                                                                 |
|                                                             | IMV                           | Mean age 69 (+/- 12)   | Hypoxic and/or dyspneic on 15 L/min nonrebreather mask                                                                                                                                             | Not reported                                  | Not reported | Not reported |                                                                                 |

|                                                |                    |                           |                                                         |                                     |                                           |              |                                                                                        |
|------------------------------------------------|--------------------|---------------------------|---------------------------------------------------------|-------------------------------------|-------------------------------------------|--------------|----------------------------------------------------------------------------------------|
| Fowler 2004(27), Cohort (n = 71), Canada, SARS | NIV, HFO, IMV      | Mean age 35.1 (+/- 6.5)   | HCW performing/assisting intubation: Nurses, Physicians | not reported                        | not reported                              | not reported | 7/9<br>Concern related to selection of participants                                    |
| Guo 2003 (85), Cohort (n= 46), China, SARS     | MV vs No MV        | Mean age (SD) 48.2 (15.1) | Severe SARS with hypoxia                                | Not reported                        | Not reported                              | Not reported | 4/9<br>Concern related to selection and comparability of the groups                    |
| He 2020 (86), Cohort (n= 37), China, COVID-19  | SOT vs HFNC vs NIV | Not reported              | Not reported                                            | Not reported                        | Not reported                              | Not reported | 6/9<br>Concern related to selection and comparability of the groups                    |
| Hua 2020 (87), Cohort (n= 45), China, COVID-19 | HFNC               | Mean age (SD) 38.1 (0.7)  | Not reported                                            | Not reported                        | Not reported                              | Not reported | 5/9<br>Concern related to selection, comparability of the groups and outcome follow-up |
|                                                | SOT                | Mean age (SD) 37.8 (0.8)  | Not reported                                            | Not reported                        | Not reported                              | Not reported |                                                                                        |
| Li 2003 (88), Cohort (n= 102), China, SARS     | MV vs no MV        | Not reported              | Severe SARS with hypoxia                                | Not reported                        | Not reported                              | Not reported | 6/9<br>Concern related to selection and comparability of groups                        |
| Li 2007(28), Cohort (n =59), Hong              | IMV                | Mean age (SD) 55.1 (15.0) | Severe SARS infection                                   | PaO2/FiO2 mmHg (probably median IQR | Chronic disease or immunosuppression 26%; | Non reported | 7/9<br>Concern related to the                                                          |

|                                                            |                                        |                             |                                                                                                                                                                                                                        |                                                                               |                                                                                                          |                                |                                                                                        |
|------------------------------------------------------------|----------------------------------------|-----------------------------|------------------------------------------------------------------------------------------------------------------------------------------------------------------------------------------------------------------------|-------------------------------------------------------------------------------|----------------------------------------------------------------------------------------------------------|--------------------------------|----------------------------------------------------------------------------------------|
| Kong (China), SARS                                         |                                        |                             |                                                                                                                                                                                                                        | although not described) 140 (79–175)                                          |                                                                                                          |                                | comparability of the groups                                                            |
|                                                            | No IMV                                 | Mean age (SD) 39.2 (10.9)   | Severe SARS infection                                                                                                                                                                                                  | On admission PaO <sub>2</sub> /FiO <sub>2</sub> median (range): 142 (107–199) | Chronic disease or immunosuppression 10%                                                                 | Not reported                   |                                                                                        |
| Liao 2020(29), Cohort (n = 81), China, COVID-19 (preprint) | HFNC, NIV, SOT (nasal catheter & mask) | Median (IQR) age 50 (39-65) | Dyspnea with respiratory rate $\geq$ 30; pulse oxygenation < 93%; PaO <sub>2</sub> :FiO <sub>2</sub> < 300; lung infiltrates >50% within 24 to 48 hours; respiratory failure, septic shock, and/or multi-organ failure | PaO <sub>2</sub> :FiO <sub>2</sub> ratio (<300 mmHg)                          | Hypertension (18.5%), Diabetes (22.2%), chronic pulmonary disease (13.6%), chronic heart failure (4.9%), | Lung infiltrates > 50% in 4.9% | 5/9<br>Concern related to selection, comparability of the groups and outcome follow-up |
| Liu 2003(89), Cohort (n= 44), China, SARS                  | NIV vs IMV                             | Not reported                | SARS with symptom, abnormal lab test and lung CT                                                                                                                                                                       | Not reported                                                                  | Not reported                                                                                             | Not reported                   | 4/9<br>Concern related to selection and comparability of groups                        |
| Liu 2004(33), RCT (n =60), China, SARS                     | NIV                                    | Age range:18-54             | PaCO <sub>2</sub> :45-70                                                                                                                                                                                               | not reported                                                                  | not reported                                                                                             | not reported                   | Some concerns due to imbalances in baseline characteristics                            |
|                                                            | No MV                                  | Age range:17-55             | PaCO <sub>2</sub> :45-70                                                                                                                                                                                               | not reported                                                                  | not reported                                                                                             | not reported                   |                                                                                        |
| Liu 2020 (90), Cohort (n= 47), China, COVID-19             | NIV vs IMV                             | Age >60 years: 89%          | Not reported                                                                                                                                                                                                           | Not reported                                                                  | Heart failure (51.1%), renal failure (31.2%)                                                             | Not reported                   | 4/9<br>Concern related to selection, comparability                                     |

|                                                             |                |                              |                                                                                                                                                        |                                                                                                                                                   |                                                                       |                               |                                                                                                             |
|-------------------------------------------------------------|----------------|------------------------------|--------------------------------------------------------------------------------------------------------------------------------------------------------|---------------------------------------------------------------------------------------------------------------------------------------------------|-----------------------------------------------------------------------|-------------------------------|-------------------------------------------------------------------------------------------------------------|
|                                                             |                |                              |                                                                                                                                                        |                                                                                                                                                   |                                                                       |                               | , and<br>outcome<br>follow up                                                                               |
| Liu 2020 (91),<br>Cohort (n=32), China,<br>COVID-19         | NIV vs<br>HFNC | Not reported                 | Not reported                                                                                                                                           | Not reported                                                                                                                                      | Not reported                                                          | Not reported                  | 5/9<br>Concern<br>related to<br>selection,<br>comparability<br>, and<br>outcome<br>follow up                |
| Mo 2020 (92),<br>Cohort (n=38), China,<br>COVID-19          | HFNC           | Mean age (SD)<br>59.8 (10.6) | Not reported                                                                                                                                           | Not reported                                                                                                                                      | Not reported                                                          | Not reported                  | 6/9<br>Concern<br>related to<br>selection and<br>comparability<br>of groups                                 |
|                                                             | SOT            | Mean age (SD)<br>60.3 (16.3) | Not reported                                                                                                                                           | Not reported                                                                                                                                      | Not reported                                                          | Not reported                  |                                                                                                             |
| Wang 2004<br>(93), Cohort<br>(n= 220),<br>China, SARS       | NIV vs IMV     | Age range<br>20 - 76         | Severe SARS with<br>hypoxia                                                                                                                            | Not reported                                                                                                                                      | Not reported                                                          | Not reported                  | 6/9<br>Concern<br>related to<br>selection and<br>comparability<br>of groups                                 |
| Wang<br>2020(30),<br>Cohort (n =<br>27), China,<br>COVID-19 | HFNC           | Median (IQR) 65<br>(56–75)   | Patients with<br>pneumonia<br>secondary to<br>COVID-19 who<br>required HFNC,<br>NIV or invasive<br>ventilation<br>(severe<br>respiratory<br>failure).. | At baseline, the<br>number of<br>patients with<br>PaO <sub>2</sub> / FiO <sub>2</sub> ><br>200 and ≤ 200<br>mmHg was 6<br>and 11,<br>respectively | Hypertension (18%),<br>Diabetes (18%), Chronic<br>heart failure (18%) | Pulmonary<br>infiltrates 100% | 6/9<br>Concern<br>related to<br>selection and<br>comparability<br>of the groups<br>and outcome<br>follow-up |



|                                                         |                                                  |                                             |                                                                                                                   |                                                                                                                        |                                                                                                                                                                                                                                    |                              |                                                                     |
|---------------------------------------------------------|--------------------------------------------------|---------------------------------------------|-------------------------------------------------------------------------------------------------------------------|------------------------------------------------------------------------------------------------------------------------|------------------------------------------------------------------------------------------------------------------------------------------------------------------------------------------------------------------------------------|------------------------------|---------------------------------------------------------------------|
|                                                         | NIV                                              | not reported                                | not reported                                                                                                      | not reported                                                                                                           | not reported                                                                                                                                                                                                                       | not reported                 |                                                                     |
| Wang 2020 (94), Cohort (n= 548), China, COVID-19        | NIV vs IMV vs HFNC                               | Not reported                                | Not reported                                                                                                      | Not reported                                                                                                           | Baseline data available only for initial cohort with 548 pts:<br>Comorbidities n (%):<br>Hypertension 166 (30), coronary heart disease 34 (6), diabetes mellitus 83 (15), chronic kidney disease 10 (2), asthma 5 (1), COPD 17 (3) | Not reported                 | 6/9<br>Concern related to selection and comparability of the groups |
| Wu 2020(31), Cohort (n = 201), China, COVID-19          | Standard oxygen therapy, NIV, IMV, IMV with ECMO | Median (IQR) 51 (43 – 60) for entire cohort | not reported                                                                                                      | not reported                                                                                                           | not reported                                                                                                                                                                                                                       | not reported                 | 6/9<br>Concern related to selection and comparability of the groups |
| Xu 2010(12), Cohort (n = 127), China, SARS              | No MV, NIV, IMV                                  | Mean age (40.5 ± 15.6)                      | Confirmed SARS patients and oxygenation index < 300 mmHg (, the data is more complete<br>A total of 127 patients. | not reported                                                                                                           | not reported                                                                                                                                                                                                                       | not reported                 | 8/9<br>No major concern                                             |
| Yam 2005(32), Cohort (n = 493), Hong Kong (China), SARS | NIV                                              | median:47 years                             | <b>Inclusion criteria:</b><br>ever developed ARF during hospitalization for SARS                                  | FiO2>0.21: 19% pts, FiO2>0.50: 0% pts,<br><b>Respiratory status %:</b> non ARF:76.2%, ARF (ALI+ARDS): 23.8%, ARDS:2.4% | % with comorbidities: 23.8%, not specified                                                                                                                                                                                         | median radiographic score= 6 | 8/9<br>No major concern                                             |

|                                              |                  |                                               |                          |                                                                                                                                        |                                            |                              |                                                                 |
|----------------------------------------------|------------------|-----------------------------------------------|--------------------------|----------------------------------------------------------------------------------------------------------------------------------------|--------------------------------------------|------------------------------|-----------------------------------------------------------------|
|                                              | IMV              | median: 44 years                              |                          | FiO <sub>2</sub> >0.21: 10.7% pts, FiO <sub>2</sub> >0.50: 1.6% pts, Respiratory status %: non ARF:87%, ARF (ALI+ARDS): 13%, ARDS:5.4% | % with comorbidities: 17.7%, not specified | median radiographic score= 2 |                                                                 |
| Yang 2003 (95), Cohort (n= 63), China, SARS  | MV vs no MV      | Not reported                                  | Severe SARS with hypoxia | Not reported                                                                                                                           | Not reported                               | Not reported                 | 4/9<br>Concern related to selection, comparability and outcome  |
| Yang 2004 (96), Cohort (n= 216), China, SARS | MV(NIV) vs no MV | Not reported                                  | Not reported             | Not reported                                                                                                                           | Not reported                               | Not reported                 | 6/9<br>Concern related to selection and comparability of groups |
| Yu 2003 (97), Cohort (n= 167), China, SARS   | NIV vs IMV       | Baseline mean age of the initial cohort: 36.6 | Not reported             | Not reported                                                                                                                           | Not reported                               | Not reported                 | 7/9<br>Concern related to comparability of groups               |
| Zheng 2004 (98), Cohort (n= 21), China, SARS | NIV              | Mean age (SD) 39.2 (5.2)                      | Not reported             | Not reported                                                                                                                           | Not reported                               | Not reported                 | 6/9<br>Concern related to selection and comparability of groups |
|                                              | IMV              | Mean age (SD) 49.3 (17.0)                     | Not reported             | Not reported                                                                                                                           | Not reported                               | Not reported                 |                                                                 |

NIV: noninvasive mechanical ventilation; IMV: invasive mechanical ventilation; MV: mechanical ventilation; ECMO; Extracorporeal membrane oxygenation; SOT: standard oxygen therapy; HFNC; High flow oxygen by nasal canula; ETT: endotracheal tube; HFO: high flow oxygen; SARS: Severe acute respiratory syndrome; MERS: Middle East respiratory syndrome; HCW: healthcare worker; ICU: intensive care unit; NIPPV: noninvasive positive pressure ventilation; ARF: acute respiratory failure; COPD = chronic obstructive pulmonary disease

\*Risk of bias per outcome for randomized studies was assessed using the Cochrane Risk of Bias tool 2.0 (overall risk of bias rating is presented here); risk of bias for non-randomized studies was assessed using the Newcastle-Ottawa scale (overall star rating is presented here; zero stars are represented as a dash (-), indicating high risk of bias).

Supplement 6. Results of randomized, adjusted and unadjusted studies of SARS, MERS and COVID-19 patients comparing no ventilation, invasive mechanical ventilation and non-invasive mechanical ventilation by outcome and subgroups (stream 1).

| 1). Comparison                             | Name of study                                                           | Outcome (duration follow-up)         | Intervention              | Comparator                | Effect estimate [OR (95%CI)] with subgroups or narrative for adjusted studies                                                                                          |
|--------------------------------------------|-------------------------------------------------------------------------|--------------------------------------|---------------------------|---------------------------|------------------------------------------------------------------------------------------------------------------------------------------------------------------------|
| NIV (intervention) versus IMV (comparator) | Alraddadi 2019(21)<br>Cohort (n = 302)<br>Kingdom of Saudi Arabia, MERS | Mortality (90 days)                  | 69/105                    | 150/197                   | 0.61 (0.23 – 1.60)<br><br>PaO <sub>2</sub> /FiO <sub>2</sub> ratio ≤ 100: 0.56 (0.12 – 2.66)<br><br>PaO <sub>2</sub> /FiO <sub>2</sub> ratio > 100: 0.54 (0.18 – 1.61) |
|                                            |                                                                         | Days of hospital stay (90 days)      | 20 (11 – 35) <sup>a</sup> | 22 (12 – 38) <sup>a</sup> | n/a                                                                                                                                                                    |
|                                            |                                                                         | Length of ICU stay (90 days)         | 11 (6 – 18) <sup>a</sup>  | 11 (6 – 24) <sup>a</sup>  | n/a                                                                                                                                                                    |
|                                            | Wu 2020(31),<br>Cohort (n = 201),<br>China, COVID-19                    | Mortality (n.r.)                     | 38/61                     | 5/5                       |                                                                                                                                                                        |
|                                            | Yam 2005(32),<br>Cohort (n = 493),<br>Hong Kong (China),<br>SARS        | Mortality (n.r.)                     | 4/42                      | 113/451                   | 0.24 (0.10 – 0.72)                                                                                                                                                     |
|                                            |                                                                         | Need for invasive ventilation        | n.r.                      | n.r.                      | 0.36 (0.16 – 0.78)                                                                                                                                                     |
| Duca 2020(26),<br>Cohort (n = 320),        | Mortality (up to 24 days)                                               | 46/71 (Helmet CPAP)<br><br>4/7 (NIV) | 2/7                       | n/a                       |                                                                                                                                                                        |

|                                                 |                                              |                           |                          |                       |                                           |
|-------------------------------------------------|----------------------------------------------|---------------------------|--------------------------|-----------------------|-------------------------------------------|
| Italy, COVID-19 (preprint)                      |                                              |                           |                          |                       |                                           |
| Liu 2003(89), Cohort (n= 44), China, SARS       | Hospital mortality (4 months)                | 0/5                       | 8/10                     | n/a                   |                                           |
|                                                 | Pulmonary infection (11 days)                | 0/5                       | 5/10                     | n/a                   |                                           |
| Liu 2020(90), Cohort (n= 47), China, COVID-19   | Length of hospital stay (Before death)       | 7 (4 – 9.75) <sup>a</sup> | 13 (7 – 21) <sup>a</sup> | n/a                   |                                           |
| Wang 2004(93), Cohort (n= 220), China, SARS     | Mortality (50 days)                          | 8/24                      | 8/8                      | n/a                   |                                           |
| Wang 2020(94), Cohort (n= 548), China, COVID-19 | Mortality (15 days)                          | 46/78                     | 16/25                    | HR 1.61 (0.84 – 3.09) |                                           |
| Yu 2003 (97), Cohort (n= 167), China, SARS      | Hospital mortality (n.r.)                    | 13/50                     | 2/2                      | n/a                   |                                           |
| Zheng 2004 (98), Cohort (n= 21), China, SARS    | Hospital mortality (n.r.)                    | 0/11                      | 4/10                     | n/a                   |                                           |
|                                                 | Length of hospital stay (n.r.)               | 32.7 ±10.5                | 45.3 ±23.9               | n/a                   |                                           |
|                                                 | Secondary infection after ventilation (n.r.) | 1/11                      | 8/10                     | n/a                   |                                           |
| NIV (intervention) versus no IMV including      | Liu 2004(33), RCT (n =60), China, SARS       | Mortality (n.r.)          | 0/30                     | 3/30                  | No deaths in the NIV group (n = 30) and 3 |

|                                                   |                                                            |                                      |      |                        |                                    |
|---------------------------------------------------|------------------------------------------------------------|--------------------------------------|------|------------------------|------------------------------------|
| conventional oxygen therapy (comparator)          |                                                            |                                      |      |                        | deaths in the no MV group (n = 30) |
|                                                   | Xu 2010(12), Cohort (n = 127), China, SARS                 | Mortality (n.r.)                     | n.r. | n.r.                   | 0.21 (0.09 - 0.47)                 |
|                                                   | Liao 2020(29), Cohort (n = 81), China, COVID-19 (preprint) | Recovery (28 days)                   | 8/13 | 3/4 (mask)             | n/a                                |
|                                                   | Liao 2020(29), Cohort (n = 81), China, COVID-19 (preprint) | Recovery (28 days)                   | 8/13 | 34/51 (nasal catheter) | n/a                                |
|                                                   | He 2020 (86), Cohort (n= 37), China, COVID-19              | Need for invasive ventilation (n.r.) | 2/6  | 1/10                   | n/a                                |
| CPAP or BiPaP (intervention) vs HFNC (comparator) | He 2020 (86), Cohort (n= 37), China, COVID-19              | Need for invasive ventilation (n.r.) | 2/6  | 2/21                   | n/a                                |
|                                                   | Liu 2020 (91), Cohort (n= 32), China, COVID-19             | Hospital mortality (n.r.)            | 3/10 | 0/8                    | n/a                                |
|                                                   |                                                            | Need for invasive ventilation (n.r.) | 1/10 | 0/8                    | n/a                                |
|                                                   | Wang 2020(30), Cohort (n = 27), China, COVID-19            | Need for invasive ventilation        | 1/9  | 2/17                   | n/a                                |

|                                           |                                                            |                                                                                      |                           |                           |     |
|-------------------------------------------|------------------------------------------------------------|--------------------------------------------------------------------------------------|---------------------------|---------------------------|-----|
|                                           | Liao 2020(29), Cohort (n = 81), China, COVID-19 (preprint) | Recovery (28 days)                                                                   | 5/8                       | 8/13                      | n/a |
| IMV (intervention) vs no IMV (comparator) | Li 2007(28), Cohort (n =59), Hong Kong (China), SARS       | Hospital mortality (at discharge)                                                    | 13/27                     | 1/31                      | n/a |
|                                           |                                                            | Length of hospital stay (at discharge)                                               | 38 (22 – 77) <sup>a</sup> | 23 (19 – 42) <sup>a</sup> | n/a |
|                                           |                                                            | Length of ICU stay (at discharge)                                                    | 17 (10 – 38) <sup>a</sup> | 6 (4 – 7) <sup>a</sup>    | n/a |
|                                           | Auld 2020 (84), Cohort (n= 217), USA, COVID-19 (preprint)  | Deaths on ICU (n.r.)                                                                 | 47/133                    | 5/48                      | n/a |
|                                           | Booth 2003(23), Cohort (n = 144), Canada, SARS             | Deaths on ICU (n.r.)                                                                 | 7/20                      | 1/9                       | n/a |
|                                           | Fowler 2004(27), Cohort (n = 71), Canada, SARS             | HCW developing SARS due to performing/assisting in endotracheal intubation (21 days) | 6/14                      | 2/62                      | n/a |
|                                           |                                                            | Nurses developing SARS due to assisting in endotracheal intubation (21 days)         | 3/4                       | 2/57                      | n/a |

|                                         |                                                     |                                                                                |       |       |     |
|-----------------------------------------|-----------------------------------------------------|--------------------------------------------------------------------------------|-------|-------|-----|
|                                         |                                                     | Physicians developing SARS due to performing endotracheal intubation (21 days) | 3/10  | 0/5   | n/a |
|                                         |                                                     | Nurses developing SARS due to exposure in assisting NIPPV patients (21 days)   | 1/6   | 2/28  | n/a |
| MV (intervention) vs No MV (comparator) | Choi 2016(25), Cohort (n = 186), South Korea, MERS  | Mortality (n.r.)                                                               | 20/45 | 8/141 | n/a |
|                                         | Guo 2003 (85), Cohort (n= 46), China, SARS          | Hospital mortality (n.r.)                                                      | 3/13  | 21/33 | n/a |
|                                         | Li 2003 (88), Cohort (n= 102), China, SARS          | Hospital mortality (n.r.)                                                      | 21/70 | 3/32  | n/a |
|                                         | Yang 2003 (95), Cohort (n= 63), China, SARS         | Hospital mortality (n.r.)                                                      | 16/35 | 4/28  | n/a |
|                                         | Yang 2004 (96), Cohort (n= 216), China, SARS        | Pneumothorax and mediastinal emphysema                                         | 7/27  | 1/189 |     |
| MV (intervention) vs SOT (comparator)   | Chiang 2004(24), Cohort (14 patients), Taiwan, SARS | Mortality                                                                      | 1/5   | 0/9   | n/a |
| HFNC (intervention) vs Conventional     | He 2020 (86), Cohort (n= 37), China, COVID-19       | Need for invasive ventilation (n.r.)                                           | 2/21  | 1/10  | n/a |



|                                                                                             |                                                                     |                                                                                      |               |             |                          |
|---------------------------------------------------------------------------------------------|---------------------------------------------------------------------|--------------------------------------------------------------------------------------|---------------|-------------|--------------------------|
| oxygen therapy:<br>mask (comparator)                                                        |                                                                     |                                                                                      |               |             |                          |
|                                                                                             | Hua 2020 (87),<br>Cohort (n= 45),<br>China, COVID-19                | Time to improvement in<br>CT in days (absorption of<br>lesion area $\geq$ 30%) (n.r) | 4.8 $\pm$ 2.4 | 8 $\pm$ 2.8 | n/a                      |
|                                                                                             | Mo 2020 (92), Cohort<br>(n= 38), China,<br>COVID-19                 | Need for invasive<br>ventilation (n.r.)                                              | 5/22          | 5/16        | n/a                      |
|                                                                                             | Liao 2020(29),<br>Cohort (n = 81),<br>China,<br>COVID-19 (preprint) | Recovery (28 days)                                                                   | 5/8           | 3/4         | n/a                      |
| HFNC (intervention)<br>vs Conventional<br>oxygen therapy:<br>Nasal catheter<br>(comparator) | Liao 2020(29),<br>Cohort (n = 81),<br>China,<br>COVID-19 (preprint) | Recovery (28 days)                                                                   | 5/8           | 34/51       | n/a                      |
| HFO (intervention)<br>vs IMV (comparator)                                                   | Fowler 2004(27),<br>Cohort (n = 71),<br>Canada, SARS                | Nurses developing SARS<br>due to exposure in<br>assisting HFO patients<br>(21 days)  | 2/38          | 2/28        | n/a                      |
|                                                                                             | Wang 2020 (94),<br>Cohort (n= 548),<br>China, COVID-19              | Mortality (15 days)                                                                  | 9/24          | 16/25       | HR 1.11 (0.43 –<br>2.83) |
| Nasal catheter<br>(intervention) vs<br>Mask (comparator)                                    | Liao 2020(29),<br>Cohort (n = 81),<br>China,<br>COVID-19 (preprint) | Recovery (28 days)                                                                   | 34/51         | 3/4         | n/a                      |

NIV: noninvasive mechanical ventilation; IMV: invasive mechanical ventilation; MV: mechanical ventilation; ECMO; Extracorporeal membrane oxygenation; SOT: standard oxygen therapy; HFNC; High flow oxygen by nasal canula; ETT: endotracheal tube; HFO: high flow oxygen; SARS:

V 20200509

Severe acute respiratory syndrome; MERS: Middle East respiratory syndrome; HCW: healthcare worker; ICU: intensive care unit; NIPPV: noninvasive positive pressure ventilation

a: median (IQR);

b: median (minimum & maximum)

Supplement 7. Stream 2: Description of systematic reviews of high or moderate quality about the use of non-invasive ventilation in patients with hypoxemic respiratory failure since 2017

| Interventions                | Study               | Population and detailed interventions                                                                                                                                                | AMSTAR 2 quality judgment for the systematic review | Judgments about indirectness of the population (do the results apply to COVID-19)   | Authors results and conclusion                                                                                                                                                                                                                                                                                                                                               |
|------------------------------|---------------------|--------------------------------------------------------------------------------------------------------------------------------------------------------------------------------------|-----------------------------------------------------|-------------------------------------------------------------------------------------|------------------------------------------------------------------------------------------------------------------------------------------------------------------------------------------------------------------------------------------------------------------------------------------------------------------------------------------------------------------------------|
| <b>NIV vs. standard care</b> | Berbenetz 2019 (34) | Adults with acute cardiogenic pulmonary edema                                                                                                                                        | High                                                | Population considered too indirect for extrapolation to COVID-19 patients.          | N/A                                                                                                                                                                                                                                                                                                                                                                          |
|                              | Zheng 2019 (40)     | Adults with acute respiratory failure; "helmet-assisted non-invasive ventilation" vs. conventional oxygen therapy                                                                    | Moderate                                            | Population possibly appropriate for extrapolation to COVID-19 patients but indirect | Four RCTs, one clearly in helmet CPAP, showed an OR=0.43 (95% CI: 0.22-0.81) for mortality (183 patients in the NIV and 179 patients in the comparison group).                                                                                                                                                                                                               |
|                              | Xiu-Ping 2017 (39)  | Acute hypoxemic (non hypercapnic) respiratory failure unrelated to exacerbation of COPD and cardiogenic pulmonary edema; NIV vs. standard oxygen therapy; BiPaP used and helmet NIV. | Moderate                                            | Population possibly appropriate for extrapolation to COVID-19 patients but indirect | Eleven studies (1,480 patients) compared NIV with standard oxygen therapy. NIV reduced the need for intubation [RR 0.59 (95% CI, 0.44–0.79) moderate certainty]. Furthermore, hospital mortality was also reduced [(RR 0.46; 95% CI, 0.24–0.87) moderate certainty]. The results suggest that mild AHRF patients could benefit from NIV with helmet in reducing the hospital |

|                              |                     |                                                                                      |          |                                                                                                                                   |                                                                                                                                                                                                                                                                                                                                                                                                                                                       |
|------------------------------|---------------------|--------------------------------------------------------------------------------------|----------|-----------------------------------------------------------------------------------------------------------------------------------|-------------------------------------------------------------------------------------------------------------------------------------------------------------------------------------------------------------------------------------------------------------------------------------------------------------------------------------------------------------------------------------------------------------------------------------------------------|
|                              |                     |                                                                                      |          |                                                                                                                                   | mortality. There was one out of six RCTs reporting hospital mortality with BiPAP and the authors concluded that BiPAP would possibly be more effective than CPAP.                                                                                                                                                                                                                                                                                     |
| <b>CPAP in children</b>      | Bharadwaj 2020 (35) | Preterm infants; bubble CPAP vs all other CPAP forms                                 | Moderate | Population considered <b>too indirect</b> for extrapolation to children with COVID-19 given pre-term infants.                     | N/A                                                                                                                                                                                                                                                                                                                                                                                                                                                   |
|                              | Jat 2019 (36)       | Infants and children up to 3 years of age with acute bronchiolitis: CPAP vs. no CPAP | High     | Population considered <b>too indirect</b> for extrapolation to children with COVID-19 – included children under 12 months of age. | N/A                                                                                                                                                                                                                                                                                                                                                                                                                                                   |
| <b>HFNC vs standard care</b> | Bocchile 2019 (41)  | Adult critically ill patients; HFNC vs. conventional oxygen therapy                  | Moderate | Possibly too indirect, many studies in post extubation patients or surgery patients.                                              | Seventeen studies involving 3,978 patients were included. There was no reduction in the need for intubation or re-intubation with high-flow nasal cannula (OR 0.72; 95%CI 0.52 - 1.01); There was no difference in the need for therapy escalation (OR 0.80, 95% CI 0.59 - 1.08), mortality at the longest follow-up (OR 0.94; 95%CI 0.70 - 1.25), hospital mortality (OR 0.84; 95% CI 0.56 - 1.26) or noninvasive ventilation (OR 0.64, 95%CI 0.39 - |

|                          |                                                                                           |          |                                                                                                                                                          |                                                                                                                                                                                                                                                                                                                                                                                                                                                                                                                                                                                                                                                                                                                                                                                                                                                                                                       |        |
|--------------------------|-------------------------------------------------------------------------------------------|----------|----------------------------------------------------------------------------------------------------------------------------------------------------------|-------------------------------------------------------------------------------------------------------------------------------------------------------------------------------------------------------------------------------------------------------------------------------------------------------------------------------------------------------------------------------------------------------------------------------------------------------------------------------------------------------------------------------------------------------------------------------------------------------------------------------------------------------------------------------------------------------------------------------------------------------------------------------------------------------------------------------------------------------------------------------------------------------|--------|
|                          |                                                                                           |          |                                                                                                                                                          |                                                                                                                                                                                                                                                                                                                                                                                                                                                                                                                                                                                                                                                                                                                                                                                                                                                                                                       | 1.05). |
| Luo 2019 (45) (subgroup) | <b>Children</b> with respiratory distress; HFNC vs. standard oxygen therapy or Nasal CPAP | Moderate | Bronchiolitis or pneumonia in nearly all studies.                                                                                                        | Compared with standard oxygen therapy, HFNC reduced treatment failure (RR 0.49, 95% CI 0.40-0.60) in 5 RCTs of 1,978 patients. One RCT (n=146 patients) found a RR of 0.85 (95% CI 0.38-1.91) for mortality with HFNC.                                                                                                                                                                                                                                                                                                                                                                                                                                                                                                                                                                                                                                                                                |        |
| Rochweg 2019 (44)        | Acute hypoxemic respiratory failure of any cause; HFNC vs. Conventional oxygen therapy    | Moderate | Population possibly appropriate for extrapolation to COVID-19 patients but indirect (one of 9 RCTs was conducted in patients with cardiopulmonary edema) | In 9 RCTs (n = 2,093 patients) the authors found no difference in mortality in patients treated with HFNC [(RR 0.94, 95% CI 0.67–1.31, moderate certainty)] compared to conventional oxygen therapy. The risk of requiring intubation [(RR 0.85, 95% CI 0.74–0.99) low certainty] or escalation of oxygen therapy (defined as crossover to HFNC in the control group, or initiation of non-invasive ventilation or invasive mechanical ventilation in either group) favoured HFNC-treated patients [(RR 0.71, 95% CI 0.51–0.98) low certainty]. HFNC had no effect on intensive care unit length of stay (mean difference [MD] 1.38 days more, 95% CI 0.90 days fewer to 3.66 days more, low certainty), hospital length of stay (MD 0.85 days fewer, 95% CI 2.07 days fewer to 0.37 days more, moderate certainty), patient reported comfort (SMD 0.12 lower, 95% CI 0.61 lower to 0.37 higher, very |        |

|                              |                                                                                                   |          |                                                                                                                                                                                                        |                                                                                                                                                                                                                                                                                                                                                                                                                                                                                             |
|------------------------------|---------------------------------------------------------------------------------------------------|----------|--------------------------------------------------------------------------------------------------------------------------------------------------------------------------------------------------------|---------------------------------------------------------------------------------------------------------------------------------------------------------------------------------------------------------------------------------------------------------------------------------------------------------------------------------------------------------------------------------------------------------------------------------------------------------------------------------------------|
|                              |                                                                                                   |          |                                                                                                                                                                                                        | low certainty) or patient reported dyspnea (standardized mean difference [SMD] 0.16 lower, 95% CI 1.10 lower to 1.42 higher, low certainty). Complications of treatment were variably reported amongst included studies, but little harm was associated with HFNC use.                                                                                                                                                                                                                      |
| Huiying 2017 (42) (subgroup) | Adults with respiratory failure who received oxygen therapy: HFNC vs. conventional oxygen therapy | Moderate | Possibly too indirect, most studies in post extubation patients or surgery patients.                                                                                                                   | Nine RCTs (1,914 patients) comparing HFNC with conventional oxygen therapy. HFNC was associated with a significant reduction in intubation rate (OR 0.52, 95% CI 0.34 - 0.79, n = 1,854), mechanical ventilation rate (OR 0.56, 95% CI 0.33 to 0.97, n = 1,914) and the rate of escalation of respiratory support (OR 0.45, 95% CI 0.31 to 0.67, n = 1,914). There was no difference in mortality [(OR 1.01, 95% CI 0.67 to 1.53, n = 1,497), low to moderate certainty for these outcomes. |
| Ou 2017 (43) (subgroup)      | Adults with acute hypoxemic respiratory failure; HFNC vs. conventional oxygen therapy             | Moderate | Adults (age > 16 yr) in ICUs with acute hypoxemic respiratory failure (ratio of partial pressure of arterial oxygen to inspired fraction of oxygen [Pao <sub>2</sub> :Fio <sub>2</sub> ] ≤ 300 mm Hg). | Four RCTs (n = 859) compared HFNC with conventional oxygen therapy. HFNC was associated with a lower intubation rate [RR 0.60, 95% CI 0.38 - 0.94).                                                                                                                                                                                                                                                                                                                                         |

|                                       |                              |                                                                                                                                                            |          |                                                                                   |                                                                                                                                                                                                                                                                                                                                                                                                                                                                                                                                                                        |
|---------------------------------------|------------------------------|------------------------------------------------------------------------------------------------------------------------------------------------------------|----------|-----------------------------------------------------------------------------------|------------------------------------------------------------------------------------------------------------------------------------------------------------------------------------------------------------------------------------------------------------------------------------------------------------------------------------------------------------------------------------------------------------------------------------------------------------------------------------------------------------------------------------------------------------------------|
| <b>HFNC vs standard care with NIV</b> | Luo 2019 (45) (subgroup)     | <b>Children</b> with respiratory distress; HFNC vs. standard oxygen therapy or Nasal CPAP                                                                  | Moderate | Bronchiolitis or pneumonia in nearly all studies.                                 | Compared with nCPAP, HFNC increased the risk for treatment failure (RR 1.74, 95% CI 1.20-2.52) in 4 RCTs of 360 patients. Three RCTs (n=329 patients) found a RR of 2.87 (95% CI 0.97-8.54) for mortality with HFNC compared to nCPAP. HFNC had an increased risk of treatment failure compared with nasal CPAP in infants age 1-6 months with severe hypoxemia (SpO <sub>2</sub> <90% on room air or SpO <sub>2</sub> >90% on supplemental oxygen) (RR 1.77, 95% CI 1.17-2.67). HFNC had a lower risk of nasal trauma compared with nCPAP (RR 0.35, 95% CI 0.16-0.77) |
|                                       | Ni 2018 (37)                 | Adult patients with acute hypoxemic respiratory failure secondary to heart failure, COPD, lung transplant - HFNC vs. conventional oxygen therapy and NIPPV | Moderate | Population considered <b>too indirect</b> for extrapolation to COVID-19 patients. | N/A                                                                                                                                                                                                                                                                                                                                                                                                                                                                                                                                                                    |
|                                       | Huiying 2017 (42) (subgroup) | Adults with respiratory failure who received oxygen therapy: HFNC vs. NIV                                                                                  | Moderate | Possibly indirect, most studies in post extubation patients or surgery patients.  | There was no difference in the intubation rate in 3 RCTs (n= 1,651) between NIV and HFNC (OR 0.96; 95% CI 0.66 to 1.39), the rate of escalation of respiratory support (OR 1.00, 95% CI 0.77 to 1.28) or mortality (OR 0.85, 95% CI 0.43 to 1.68) between the two groups, very low certainty for all outcomes.                                                                                                                                                                                                                                                         |
|                                       | Ou 2017 (43) (subgroup)      | Adults with acute hypoxemic                                                                                                                                | Moderate | Adults (age > 16 yr) in ICUs with acute                                           | Two RCTs (n = 1,033) compared HFNC with NIV. HFNC showed a RR of 0.86,                                                                                                                                                                                                                                                                                                                                                                                                                                                                                                 |

|              |                                                                                                                                                                                                    |          |                                                                                                                                                                                     |                                                                        |
|--------------|----------------------------------------------------------------------------------------------------------------------------------------------------------------------------------------------------|----------|-------------------------------------------------------------------------------------------------------------------------------------------------------------------------------------|------------------------------------------------------------------------|
|              | respiratory failure;<br>HFNC vs. NIV                                                                                                                                                               |          | hypoxemic<br>respiratory failure<br>(ratio of partial<br>pressure of arterial<br>oxygen to inspired<br>fraction of oxygen<br>[Pao <sub>2</sub> :Fio <sub>2</sub> ] ≤ 300 mm<br>Hg). | 95% CI 0.68 to 1.09 for the need for<br>intubation, compared with NIV. |
| Ni 2017 (38) | Adult patients with<br>acute hypoxemic<br>respiratory failure<br>secondary to heart<br>failure, COPD,<br>surgery, trauma, lung<br>transplant; HFNC vs.<br>conventional oxygen<br>therapy and NIPPV | Moderate | Population<br>considered <b>too<br/>indirect</b> for<br>extrapolation to<br>COVID-19 patients.                                                                                      | N/A                                                                    |

ARF: acute respiratory failure; BiPAP: Bilevel positive airway pressure; CPAP: Continuous positive airway pressure; nCPAP: Continuous positive airway pressure nasal application; NIV: non-invasive mechanical ventilation; IMV: invasive mechanical ventilation; MV: mechanical ventilation; HFNC; High flow oxygen by nasal canula; NIPPV: non-invasive positive pressure ventilation; RR: relative risk; OR: odds ratio; RCT: randomized controlled trial; AMSTAR-2: a critical appraisal tool for systematic reviews that include randomised or non-randomised studies of healthcare interventions, or both





Supplement 8. Stream 4: Characteristics of studies reproduced from CADTH review (1) (n =10)

| <b>Study;<br/>Country</b>                        | <b>Design/<br/>Setting</b>                                  | <b>Period of<br/>Evaluation</b>           | <b>Population</b>                                                                                                           | <b>Assessment of<br/>Training and<br/>Protection<br/>Equipment?</b> | <b>Laboratory Tests</b>                       | <b>Risk of Bias<sup>1</sup></b>               |
|--------------------------------------------------|-------------------------------------------------------------|-------------------------------------------|-----------------------------------------------------------------------------------------------------------------------------|---------------------------------------------------------------------|-----------------------------------------------|-----------------------------------------------|
| <b>Raboud<br/>et al,<br/>2010 (2)<br/>Canada</b> | Retrospective<br>cohort<br><br>study; Multiple<br>hospitals | 2003 SARS<br>outbreak<br><br>in Toronto   | 624 HCWs<br><br>(physicians,<br>residents,<br><br>nurses, therapists,<br><br>technologists,<br><br>housekeepers,<br>others) | Yes                                                                 | Culture and PCR for<br><br>SARS-CoV           | 7/9<br><br>Concern<br>related to<br>selection |
| <b>Chen et al,<br/>2009 (3)<br/>China</b>        | Case-control<br>study;<br><br>Hospital                      | 2003 SARS<br>outbreak<br><br>in Guangzhou | 758 HCWs<br><br>(doctors, nurses,<br>health<br><br>attendants,<br>technicians,<br>others)                                   | Yes                                                                 | ELISA for antibody<br>against<br><br>SARS-CoV | 8/9<br><br>No major<br>concern                |
| <b>Liu et al,<br/>2009 (4)<br/>China</b>         | Case-control;<br>Hospital                                   | 2003 SARS<br>outbreak<br><br>in Beijing   | 477 HCWs<br><br>(medical staff,<br>nursing                                                                                  | Yes                                                                 | ELISA for antibody<br>against<br><br>SARS-CoV | 6/9                                           |

<sup>1</sup> Using the Newcastle-Ottawa Scale (NOS)

|                                      |                                                                     |                                                |                                                                                                  |                                                                                                                               |                                                             |                                                       |
|--------------------------------------|---------------------------------------------------------------------|------------------------------------------------|--------------------------------------------------------------------------------------------------|-------------------------------------------------------------------------------------------------------------------------------|-------------------------------------------------------------|-------------------------------------------------------|
|                                      |                                                                     |                                                | staff, others)                                                                                   |                                                                                                                               |                                                             | Concern related to exposure                           |
| <b>Pei et al, 2006 (5) China</b>     | Case-control study;<br>Three hospitals                              | 2002–2003 SARS outbreak in Beijing and Tianjin | 443 HCWs (doctors, nurses, technicians, administrators, others)                                  | Yes                                                                                                                           | No mention of methods to detect antibodies against SARS-CoV | 7/9<br>Concern related to exposure                    |
| <b>Fowler et al, 2004 (6) Canada</b> | Retrospective cohort study; Intensive care unit                     | 2003 SARS outbreak in Toronto                  | 122 critical care staff (physicians, nurses, nursing assistants, respiratory therapists, others) | No, on training. All HCWs wore gloves, gowns, N-95/PCM 2,000 masks, and hairnets. Eye and face shields were variably employed | PCR or serology for SARS-CoV                                | 5/9<br>Concern related to selection and comparability |
| <b>Loeb et al, 2004 (7) Canada</b>   | Retrospective cohort study; Intensive care unit; Coronary care unit | 2003 SARS outbreak in Toronto                  | 43 nurses                                                                                        | Yes                                                                                                                           | Serology, immunofluorescence                                | 5/9<br>Concern related to selection and comparability |

|                                                  |                                                       |                                    |                                                                    |                                                                |                                                                              |                                                                |
|--------------------------------------------------|-------------------------------------------------------|------------------------------------|--------------------------------------------------------------------|----------------------------------------------------------------|------------------------------------------------------------------------------|----------------------------------------------------------------|
| <b>Ma et al,<br/>2004 (8)<br/>China</b>          | Case-control study;<br>Five hospitals                 | 2003 SARS outbreak<br>in Beijing   | HCWs<br>(nurse assistants,<br>janitors<br>and others) (N =<br>473) | Yes                                                            | Diagnostic criteria<br>for SARS<br>from Chinese<br>Minister of<br>Health     | Not assessed<br>(full text not<br>found)                       |
| <b>Teleman et al,<br/>2004 (9)<br/>Singapore</b> | Case-control study;<br>Hospital                       | 2003 SARS outbreak<br>in Singapore | 86 HCWs<br>(doctors, nurses,<br>others)                            | Not mentioned                                                  | Symptoms, chest X-<br>ray and<br>Serology                                    | 6/9<br>Concern<br>related to<br>comparability<br>and exposure  |
| <b>Wong et al,<br/>2004 (10)<br/>China</b>       | Retrospective cohort<br>study; Hospital               | 2003 SARS outbreak<br>in Hong Kong | 66 medical<br>students                                             | Yes, on personal<br>protection<br>equipment<br>No, on training | Indirect<br>immunofluorescent<br>to detect antibodies<br>against<br>SARS-CoV | 6/9<br>Concern<br>related to<br>selection and<br>comparability |
| <b>Scales et al,<br/>2003 (11)<br/>Canada</b>    | Retrospective cohort<br>study; Intensive<br>care unit | 2003 SARS outbreak<br>in Toronto   | 69 intensive<br>care staff                                         | Unclear                                                        | Radiographic lung<br>infiltrates                                             | 5/9<br>Concern<br>related to<br>selection and<br>comparability |

### Supplement 9. Risk of severe acute respiratory syndrome transmission to healthcare workers exposed to tracheal Intubation – cohort studies (reproduced from (1))

Review: Aerosol Generating Procedures  
 Comparison: 02 Tracheal intubation  
 Outcome: 01 Exposed versus unexposed

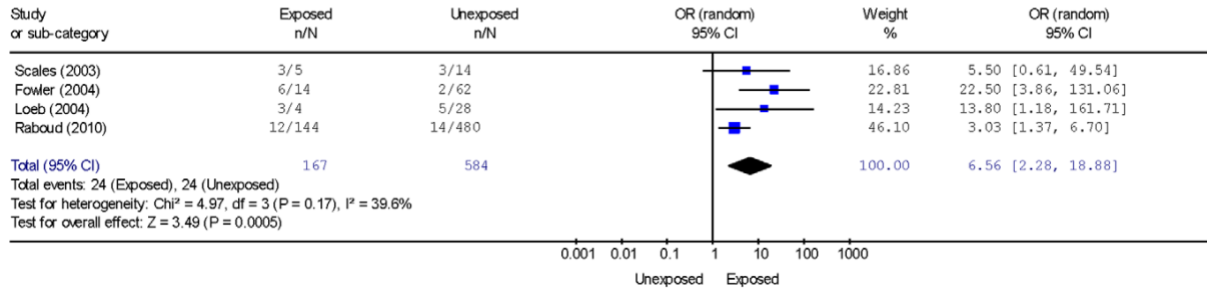

### Supplement 10. Figure 4. Risk of severe acute respiratory syndrome transmission to healthcare workers exposed to tracheal Intubation – case-control studies (reproduced from (1))

Review: Aerosol Generating Procedures  
 Comparison: 02 Tracheal intubation  
 Outcome: 02 Cases versus controls

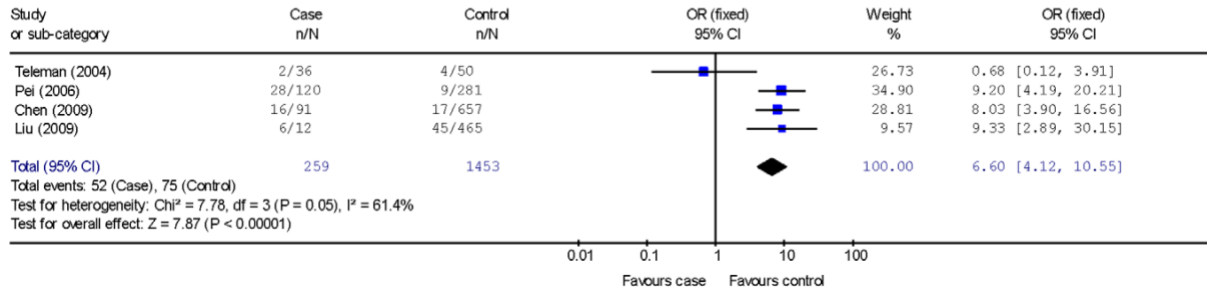

Supplement 11. Risk of SARS Transmission to HCWs Exposed and Not Exposed to Aerosol-Generating Procedures, and Aerosol Generating Procedures as Risk Factors for SARS Transmission (reproduced from the CADTH original review) (stream 4)

| Aerosol Generating Procedures                         | Odds ratio (95% CI)   |                        |
|-------------------------------------------------------|-----------------------|------------------------|
|                                                       | Point estimate        | Pooled estimate; I2    |
| <b>Tracheal intubation (4 cohort studies)</b>         | 3.0 (1.4, 6.7)(2)     | 6.6 (2.3, 18.9); 39.6% |
|                                                       | 22.8 (3.9, 131.1)(6)  |                        |
|                                                       | 13.8 (1.2, 161.7)(7)  |                        |
|                                                       | 5.5 (0.6, 49.5) (11)  |                        |
| <b>Tracheal intubation (4 case-control studies)</b>   | 0.7 (0.1, 3.9) (9)    | 6.6 (4.1, 10.6); 61.4% |
|                                                       | 9.2 (4.2, 20.2)(5)    |                        |
|                                                       | 8.0 (3.9, 16.6) (3)   |                        |
|                                                       | 9.3 (2.9, 30.2) (4)   |                        |
| <b>Suction before intubation (2 cohort studies)</b>   | 13.8 (1.2, 161.7) (7) | 3.5 (0.5, 24.6); 59.2% |
|                                                       | 1.7 (0.7, 4.2) (2)    |                        |
| <b>Suction after intubation (2 cohort studies)</b>    | 0.6 (0.1, 3.0) (7)    | 1.3 (0.5, 3.4); 28.8%  |
|                                                       | 1.8 (0.8, 4.0) (2)    |                        |
| <b>Nebulizer treatment (3 cohort studies)</b>         | 6.6 (0.9, 50.5) (7)   | 0.9 (0.1, 13.6); 73.1% |
|                                                       | 0.1 (0.0*, 1.0)(10)   |                        |
|                                                       | 1.2 (0.1, 20.7) (2)   |                        |
| <b>Manipulation of oxygen mask (2 cohort studies)</b> | 17.0 (1.8, 165.0) (7) | 4.6 (0.6, 32.5); 64.8% |

|                                                                                               |                       |                        |
|-----------------------------------------------------------------------------------------------|-----------------------|------------------------|
|                                                                                               | 2.2 (0.9, 4.9) (2)    |                        |
| <b>Bronchoscopy (2 cohort studies)</b>                                                        | 3.3 (0.2, 59.6) (7)   | 1.9 (0.2, 14.2); 0%    |
|                                                                                               | 1.1 (0.1, 18.5) (2)   |                        |
| <b>Non-invasive ventilation (2 cohort studies)</b>                                            | 2.6 (0.2, 34.5) (6)   | 3.1 (1.4, 6.8); 0%     |
|                                                                                               | 3.2 (1.4, 7.2) (2)    |                        |
| <b>Insertion of nasogastric tube (2 cohort studies)</b>                                       | 1.7 (0.2, 11.5)(7)    | 1.2 (0.4, 4.0); 0%     |
|                                                                                               | 1.0 (0.2, 4.5) (2)    |                        |
| <b>Chest compressions (1 case-control study)</b>                                              | 4.5 (1.5, 13.8)(4)    |                        |
| <b>Chest compressions (2 cohort studies)</b>                                                  | 3.0 (0.4, 24.5) (2)   | 1.4 (0.2, 11.2); 27.3% |
|                                                                                               | 0.4 (0.0**, 7.8)(7)   |                        |
| <b>Defibrillation (2 cohort studies)</b>                                                      | 0.5 (0.0**, 12.2) (7) | 2.5 (0.1, 43.9); 55.3% |
|                                                                                               | 7.9 (0.8, 79.0) (2)   |                        |
| <b>Chest physiotherapy (2 cohort studies)</b>                                                 | 1.3 (0.2, 8.3)(7)     | 0.8 (0.2, 3.2); 0%     |
|                                                                                               | 0.5 (0.1, 3.5) (2)    |                        |
| <b>High-frequency oscillatory ventilation (1 cohort study)</b>                                | 0.7 (0.1, 5.5)(6)     |                        |
| <b>High flow oxygen (1 cohort study)</b>                                                      | 0.4 (0.1, 1.7) (2)    |                        |
| <b>Tracheotomy (1 case-control study)</b>                                                     | 4.2 (1.5, 11.5) (3)   |                        |
| <b>Intubation, tracheotomy, airway care, and cardiac resuscitation (1 case-control study)</b> | 6.2 (2.2, 18.1) (8)   |                        |
| <b>Manipulation of BiPAP mask (1 cohort study)</b>                                            | 6.2 (2.2, 18.1)(7)    |                        |

|                                                              |                    |  |
|--------------------------------------------------------------|--------------------|--|
| <b>Endotracheal aspiration (1 cohort study)</b>              | 1.0 (0.2, 5.2) (7) |  |
| <b>Suction of body fluid (1 case-control study)</b>          | 1.0 (0.4, 2.8)(9)  |  |
| <b>Administration of oxygen (1 case-control study)</b>       | 1.0 (0.3, 2.8) (9) |  |
| <b>Mechanical ventilation (1 cohort study)</b>               | 0.9 (0.4, 2.0) (2) |  |
| <b>Manual ventilation before intubation (1 cohort study)</b> | 2.8 (1.3, 6.4) (2) |  |
| <b>Manual ventilation after intubation (1 cohort study)</b>  | 1.3 (0.5, 3.2) (2) |  |
| <b>Manual ventilation (1 cohort study)</b>                   | 1.3 (0.2, 8.3)(7)  |  |
| <b>Collection of sputum sample (1 cohort study)</b>          | 2.7 (0.9, 8.2) (2) |  |

BiPAP: bi-level positive airway pressure; CI: confidence interval. \*actual value is 0.01;

\*\*actual value is 0.02.

doi:10.1371/journal.pone.0035797.t002



Supplement 12. Characteristics of included studies of COVID-19, SARS and MERS Transmission to HCWs Exposed and Not Exposed to Aerosol-Generating Procedures, and Aerosol Generating Procedures as Risk Factors for Transmission (2020 update, n =15)

| Study;<br>Country                                    | Design;<br>Setting;<br>Infection                                      | Period of Evaluation                                                | Population                                                                                                                                                                                    | Assessment of Training and Protection Equipment?                                                                                                                                                                                                                                               | Laboratory Tests                                               | Risk of bias assessment <sup>2</sup>                |
|------------------------------------------------------|-----------------------------------------------------------------------|---------------------------------------------------------------------|-----------------------------------------------------------------------------------------------------------------------------------------------------------------------------------------------|------------------------------------------------------------------------------------------------------------------------------------------------------------------------------------------------------------------------------------------------------------------------------------------------|----------------------------------------------------------------|-----------------------------------------------------|
| <b>Buchholz et al., 2013 (12)</b><br><b>Germany</b>  | Case-contact investigation;<br>Hospital;<br>Novel Coronavirus (NCoV)  | October–November 2012                                               | 120 exposed HCWs to NCoV infected case <sup>3,4</sup> (nursing staff, physicians, laboratory technicians, physician and team assistants, physiotherapists, house maintenance, cleaning staff) | No on training.<br>Protective measures limited to wearing gloves and gowns when providing intimate care and use of surgical face masks during suctioning. N = 9 performed AGPs and wore facemask rarely or not at all during 3 <sup>rd</sup> or 4 <sup>th</sup> week of the patient's illness. | Serological testing by indirect immunofluorescence assay (IFA) | 6/9; concern related to selection and comparability |
| <b>Amer et al., 2018 (13)</b><br><b>Saudi Arabia</b> | Descriptive report;<br>Hospital (AGP occurred in the medical ward and | June 2017 during MERS-CoV outbreak at King Saud Medical City (KSMC) | 879 exposed HCWs to MERS-CoV infected patients <sup>5</sup> (nurses, RRT nurses, beside nurses,                                                                                               | Mention of protection but no data reported.                                                                                                                                                                                                                                                    | Real-time PCR (RT-PCR) of nasopharyngeal                       | 5/9; concern related to                             |

<sup>2</sup> Using the Newcastle-Ottawa Scale (NOS)

<sup>3</sup> 69% reported contact at a distance of less than or equal to 2 m, 11% of more than 2 m, and 20% of unknown distance to the patient

<sup>4</sup> n=9 performed aerosol-generating procedures within the third or fourth week of illness

<sup>5</sup> HCWs included all persons who were in attendance in the same area where the index case had stayed. Number performing AGPs is not specified.

|                                                           |                                                                                                                                                                                                                                          |                                                                                                                                              |                                                                                                                                                                                                                   |                                                                                                                                                                                                                                                         |                                                                                                                                                                                |                                                              |
|-----------------------------------------------------------|------------------------------------------------------------------------------------------------------------------------------------------------------------------------------------------------------------------------------------------|----------------------------------------------------------------------------------------------------------------------------------------------|-------------------------------------------------------------------------------------------------------------------------------------------------------------------------------------------------------------------|---------------------------------------------------------------------------------------------------------------------------------------------------------------------------------------------------------------------------------------------------------|--------------------------------------------------------------------------------------------------------------------------------------------------------------------------------|--------------------------------------------------------------|
|                                                           | emergency department);<br><br>Middle East Respiratory Syndrome (MERS-CoV)                                                                                                                                                                |                                                                                                                                              | ICU specialist, cardiology specialist)                                                                                                                                                                            |                                                                                                                                                                                                                                                         | samples for MERS-CoV                                                                                                                                                           | selection and comparability                                  |
| <b>Alraddadi et al., 2016 (14)</b><br><b>Saudi Arabia</b> | Retrospective cohort; Hospital (Emergency Department and Intensive care unit where patients with MERS-CoV were treated, and neurology unit, where no MERS-CoV patients were treated);<br><br>Middle East Respiratory Syndrome (MERS-CoV) | March 24–May 3, 2014 during MERS-CoV outbreak at Faisal Specialist Hospital and Research Center;<br><br>Study conducted during May–July 2014 | 255 exposed HCWs to MERS-CoV infected patients and 33 HCWs non-exposed to MERS-CoV infected patients (radiologists technicians, nurses, respiratory therapists, physicians, clerical staff, patient transporters) | Yes. Protective measures during aerosol -generating procedures limited to wearing eye protection and/or covering nose and mouth with a medical mask or N95 respirator. Wearing gloves or gowns during aerosol -generating procedures were not reported. | Serum screening for antibodies against MERS-CoV nucleocapsid (N) protein by ELISA. Positive samples confirmed by immunofluorescence assay, microneutralization assay, or both. | 4/9; concern related to selection and comparability          |
| <b>Alanazi et al., 2019 (15)</b><br><b>Saudi Arabia</b>   | Outbreak investigation; Tertiary hospital (Intensive care unit and Emergency department), Specialty pulmonary hospital, outpatient clinic, and outpatient dialysis unit;<br><br>Middle East Respiratory Syndrome (MERS-CoV)              | May 28-June 19 during MERS-CoV outbreak involving multiple healthcare facilities in Riyadh, Saudi Arabia                                     | 26 confirmed MERS-CoV HCWs cases                                                                                                                                                                                  | No on training.<br><br>Mentioned for some exposed HCPs as not wearing an N95 mask or a powered air purifying respirator, or no airborne precautions in place during intubation, or not mentioned.                                                       | Serum testing for anti-MERS-CoV antibodies using ELISA for nucleocapsid (N) and spike (S) proteins followed by a confirmatory microneutralization                              | 4/9; concern related to selection, comparability and outcome |

|                                                        |                                                                                                                                                             |                                                                                                                         |                                                                                                             |                                                                                                            | test (MNT) for MERS-CoV.                                                                                                                                                                                     |                                                     |
|--------------------------------------------------------|-------------------------------------------------------------------------------------------------------------------------------------------------------------|-------------------------------------------------------------------------------------------------------------------------|-------------------------------------------------------------------------------------------------------------|------------------------------------------------------------------------------------------------------------|--------------------------------------------------------------------------------------------------------------------------------------------------------------------------------------------------------------|-----------------------------------------------------|
| <b>Assiri et al., 2013 (16)</b><br><b>Saudi Arabia</b> | Outbreak investigation; 4 hospitals (reported that AGP occurred in Intensive care unit); Middle East Respiratory Syndrome (MERS-CoV)                        | April – May 2013 during MERS-CoV outbreak involving four health care facilities in the eastern province of Saudi Arabia | Exposed hospital staff workers to MERS-CoV infected patients;<br><br>AGP reported for a nurse administrator | No                                                                                                         | Confirmed case of MERS-CoV infection defined as: laboratory evidence of MERS-CoV and having either fever and at least one respiratory symptom or two respiratory symptoms without another identifiable cause | 5/9; concern related to selection and comparability |
| <b>Cai et al., 2020</b><br><b>China (17)</b>           | Descriptive report; Intensive care unit; COVID-19                                                                                                           | January - February 2020                                                                                                 | 9 HCWs involved in AGP (endotracheal intubation) for COVID-19 confirmed cases                               | Yes. Protective measures were limited to Personal Protective Equipment (PPE) with positive protective hood | COVID-19 nucleic acid detection by oropharyngeal swab                                                                                                                                                        | 5/9; concern related to selection and comparability |
| <b>Folgueira et al., 2020 (18)</b><br><b>Spain</b>     | Descriptive report; Hospital (emergency department, hospital ward, intensive care unit, resuscitation unit, laboratory, pharmacy, kitchen, administration); | March 2020 during COVID-19 epidemic at a large-public hospital in Madrid, Spain                                         | 2085 exposed hospital employees to COVID-19 infected patients                                               | No                                                                                                         | SARS-CoV-2 PCR of both nasopharyngeal and oropharyngeal swabs                                                                                                                                                | 6/9; concern related to selection and comparability |

COVID-19

|                                                           |                                                                                                                                        |                                                                                     |                                                                                                                                                                 |                                                                                                                                                                                                                                                                 |                                                                                                                                              |                                                              |
|-----------------------------------------------------------|----------------------------------------------------------------------------------------------------------------------------------------|-------------------------------------------------------------------------------------|-----------------------------------------------------------------------------------------------------------------------------------------------------------------|-----------------------------------------------------------------------------------------------------------------------------------------------------------------------------------------------------------------------------------------------------------------|----------------------------------------------------------------------------------------------------------------------------------------------|--------------------------------------------------------------|
| <b>Hall et al., 2014 (19)</b><br><b>Saudi Arabia</b>      | Case-contact investigation;<br>Hospital;<br>Middle East Respiratory Syndrome (MERS-CoV)                                                | Investigation done in October 2012, data collected for period June 15–July 4, 2012) | 48 exposed HCWs to MERS-CoV infected case and 48 controls (nurses, physician, respiratory technicians, housekeeping, radiology, infection control staff member) | No for training.<br>HCW practiced hand hygiene (100%) and/or wearing of gloves (93.8%), surgical mask (87.5%), gown (39.6%), and N95 mask (33.3%). None wore eye protection. Among those reporting use of these precautions, some admitted to <100% compliance. | Serum screening for MERS-CoV antibody by nucleocapsid enzyme immunoassay (EIA), confirmed by immunofluorescence or microneutralization assay | 6/9; concern related to selection and comparability          |
| <b>Hunter et al., 2016 (20)</b><br><b>UAE (Abu Dhabi)</b> | Case-contact investigation;<br>Hospital;<br>MERS-CoV                                                                                   | January 1, 2013–May 9 during 2014 MERS-CoV outbreak                                 | 14 HCWs who became infected with MERS-CoV after caring for a source case-patient                                                                                | No on training. Yes on use of mask or N95, gloves and gowns or all three.                                                                                                                                                                                       | RT-PCR for MERS-CoV                                                                                                                          | 6/9; concern related to selection and comparability          |
| <b>Memish et al., 2013 (21)</b><br><b>Saudi Arabia</b>    | Case series;<br>Saudi Arabian Ministry of Health routine screening of all individuals in close contact with a confirmed MERS-CoV case; | Not reported                                                                        | 7 HCWs with positive diagnosis (nurse, nurse aid)                                                                                                               | No on training. Yes on use of surgical mask, respirator, eye protection, gloves and gowns.                                                                                                                                                                      | RT-PCR for MERS-CoV                                                                                                                          | 3/9; concern related to selection, comparability and outcome |

| MERS-CoV                                                                    |                                                                                                                                      |                                                                |                                                                                                                                                                                                                                      |                                                                                                                                                                      |                                             |                                                              |
|-----------------------------------------------------------------------------|--------------------------------------------------------------------------------------------------------------------------------------|----------------------------------------------------------------|--------------------------------------------------------------------------------------------------------------------------------------------------------------------------------------------------------------------------------------|----------------------------------------------------------------------------------------------------------------------------------------------------------------------|---------------------------------------------|--------------------------------------------------------------|
| <b>Zhong et al., 2020 (22)</b>                                              | ‘Retrospective, single centre, observational cohort study’;<br><br>Hospital (spinal anaesthesia);<br><br>COVID-19                    | January 1, 2020 and February 14, 2020 during COVID-19 outbreak | 44 anaesthetists who had directly cared<br><br>(within 1 m proximity) for patients with confirmed COVID-19,<br><br>but who had no contact with patients with COVID-19 outside<br><br>the hospital. All patients had a nasal cannula. | No on training.<br><br>Yes, on use of category 1 vs category 3 PPE <sup>6</sup>                                                                                      | RT-PCR for COVID-19                         | 5/9; concern related to selection and comparability          |
| <b>Angel et al., 2020 (23)</b><br><br><b>United States of America (USA)</b> | Single arm follow-up study (assessing a percutaneous tracheostomy technique);<br><br>Hospital (intensive-care unit);<br><br>COVID-19 | March-April 2020                                               | 6 physicians and 2 nurses who participated across bedside percutaneous tracheostomies of confirmed NCoV patients                                                                                                                     | No on training.<br><br>Protective measures: standard personal protective equipment (hair cover, N-95 mask, surgical mask, face shield, gown, and 2 layers of gloves) | Nasopharyngeal swab for RT-PCR for COVID-10 | 4/9; concern related to selection, comparability and outcome |
| <b>Heinzerling et al., 2020 (24)</b>                                        | Case-control;<br><br>Hospital;                                                                                                       | February 2020                                                  | 37 HCWs who were in contact with a confirmed                                                                                                                                                                                         | No on training. HCWs only used gloves and/or face masks.                                                                                                             | Nasopharyngeal and oropharyngeal            | 6/9; concern related to                                      |

<sup>6</sup> Category 1 PPE is limited to surgical mask, hat, gloves, and gowns. Category 3 PPE is required when the highest level of respiratory, skin, eye, and mucous membrane protection is needed, including positive pressure (pressure demand), self-contained breathing apparatus, and a fully encapsulating chemical protective suit plus inner and outer chemical resistant gloves)

|                              |                                                 |               |                                                                                                                                                                                                                                                        |                                                                                              |                                                     |                                                     |
|------------------------------|-------------------------------------------------|---------------|--------------------------------------------------------------------------------------------------------------------------------------------------------------------------------------------------------------------------------------------------------|----------------------------------------------------------------------------------------------|-----------------------------------------------------|-----------------------------------------------------|
| <b>USA</b>                   | COVID-19                                        |               | case of NCoV (including 3 with positive results)                                                                                                                                                                                                       |                                                                                              | specimens for real-time RT-PCR testing              | comparability and exposure                          |
| <b>Ng et al., 2020 (25)</b>  | Case-contact investigation;                     | February 2020 | 41 HCWs responsible for caring for patient with severe pneumonia                                                                                                                                                                                       | No on training. Yes on surgical mask or N-95 masks                                           | Nasopharyngeal swab for PCR assay testing           | 5/9; concern related to selection and comparability |
| <b>Singapore</b>             | Hospital (intensive-care unit);<br><br>COVID-19 |               | before confirming diagnosis of NCoV. <i>HCWs were exposed to AGPs (endotracheal intubation, extubation, noninvasive ventilation, and exposure to aerosols in an open circuit) for at least 10 minutes at less than 2 meters from the index patient</i> |                                                                                              |                                                     |                                                     |
| <b>Nam et al., 2017 (26)</b> | Epidemiological investigation;                  | June, 2015    | A nurse who was involved in a cardiopulmonary resuscitation (CPR) for a patient with bacterial pneumonia (patient was confirmed afterwards as a MERS case).                                                                                            | No on training. The nurse touched the mask and goggle with her hands in contaminated gloves. | Throat swab specimen; confirmatory test with sputum | 3/9; concern related to selection and comparability |
| <b>Korea</b>                 | Hospital;<br><br>MERS                           |               |                                                                                                                                                                                                                                                        |                                                                                              |                                                     |                                                     |

AGP: aerosol-generating procedure; COVID-19: coronavirus disease 2019; HCW: health care worker; MERS-CoV: Middle East Respiratory Syndrome Coronavirus.

## References

1. Tran K, Cimon K, Severn M, Pessoa-Silva CL, Conly J. Aerosol generating procedures and risk of transmission of acute respiratory infections to healthcare workers: a systematic review. *PloS one*. 2012;7(4).
2. Rabout J, Shigayeva A, McGeer A, Bontovics E, Chapman M, Gravel D, et al. Risk factors for SARS transmission from patients requiring intubation: a multicentre investigation in Toronto, Canada. *PLoS One*. 2010;5(5).
3. Chen W-Q, Ling W-H, Lu C-Y, Hao Y-T, Lin Z-N, Ling L, et al. Which preventive measures might protect health care workers from SARS? *BMC Public Health*. 2009;9(1):81.
4. Liu W, Tang F, Fang LQ, De Vlas SJ, Ma HJ, Zhou JP, et al. Risk factors for SARS infection among hospital healthcare workers in Beijing: a case control study. *Tropical Medicine & International Health*. 2009;14:52-9.
5. Pei L-Y, Gao Z-C, Yang Z, Wei D-G, Wang S-X, Ji J-M, et al. Investigation of the influencing factors on severe acute respiratory syndrome among health care workers. *Beijing da xue xue bao. Yi xue ban= Journal of Peking University. Health sciences*. 2006;38(3):271-5.
6. Fowler RA, Guest CB, Lapinsky SE, Sibbald WJ, Louie M, Tang P, et al. Transmission of severe acute respiratory syndrome during intubation and mechanical ventilation. *American journal of respiratory and critical care medicine*. 2004;169(11):1198-202.
7. Loeb M, McGeer A, Henry B, Ofner M, Rose D, Hlywka T, et al. SARS among critical care nurses, Toronto. *Emerging infectious diseases*. 2004;10(2):251.
8. Ma H, Wang H, Fang L, Jiang J, Wei M, Liu W, et al. A case-control study on the risk factors of severe acute respiratory syndromes among health care workers. *Zhonghua liuxingbingxue zazhi*. 2004;25(9):741-3.
9. Teleman MD, Boudville IC, Heng BH, Zhu D, Leo YS. Factors associated with transmission of severe acute respiratory syndrome among health-care workers in Singapore. *Epidemiology & Infection*. 2004;132(5):797-803.
10. Wong T-w, Lee C-k, Tam W, Lau JT-f, Yu T-s, Lui S-f, et al. Cluster of SARS among medical students exposed to single patient, Hong Kong. *Emerging infectious diseases*. 2004;10(2):269.
11. Scales DC, Green K, Chan AK, Poutanen SM, Foster D, Nowak K, et al. Illness in intensive care staff after brief exposure to severe acute respiratory syndrome. *Emerging Infectious Diseases*. 2003;9(10):1205.
12. Buchholz U, Müller MA, Nitsche A, Sanewski A, Wevering N, Bauer-Balci T, et al. Contact investigation of a case of human novel coronavirus infection treated in a German hospital, October-November 2012. 2013.
13. Amer H, Alqahtani AS, Alaklobi F, Altayeb J, Memish ZA. Healthcare worker exposure to Middle East respiratory syndrome coronavirus (MERS-CoV): revision of screening strategies urgently needed. *International Journal of Infectious Diseases*. 2018;71:113-6.
14. Alraddadi BM, Al-Salmi HS, Jacobs-Slifka K, Slayton RB, Estivariz CF, Geller AI, et al. Risk factors for Middle East respiratory syndrome coronavirus infection among healthcare personnel. *Emerging infectious diseases*. 2016;22(11):1915.
15. Alanazi KH, Killerby ME, Biggs HM, Abedi GR, Jokhdar H, Alsharef AA, et al. Scope and extent of healthcare-associated Middle East respiratory syndrome coronavirus transmission during two contemporaneous outbreaks in Riyadh, Saudi Arabia, 2017. *Infection Control & Hospital Epidemiology*. 2019;40(1):79-88.
16. Assiri A, McGeer A, Perl TM, Price CS, Al Rabeeah AA, Cummings DAT, et al. Hospital outbreak of Middle East respiratory syndrome coronavirus. *New England Journal of Medicine*. 2013;369(5):407-16.

17. Cai S, Wu L, Chen D, Li Y, Liu Y, Fan Y, et al. Analysis of bronchoscope-guided tracheal intubation in 12 cases with COVID-19 under the personal protective equipment with positive pressure protective hood. *Zhonghua jie he he hu xi za zhi= Zhonghua jiehe he huxi zazhi= Chinese journal of tuberculosis and respiratory diseases*. 2020;43:E033.
18. Folgueira MD. SARS-CoV-2 infection in Health Care Workers in a large public hospital in Madrid, Spain, during March 2020. 2020:10.
19. Hall AJ, Tokars JI, Badreddine SA, Saad ZB, Furukawa E, Al Masri M, et al. Health care worker contact with MERS patient, Saudi Arabia. *Emerging infectious diseases*. 2014;20(12):2148.
20. Hunter JC, Nguyen D, Aden B, Al Bandar Z, Al Dhaheri W, Elkheir KA, et al. Transmission of Middle East respiratory syndrome coronavirus infections in healthcare settings, Abu Dhabi. *Emerging infectious diseases*. 2016;22(4):647.
21. Memish ZA, Zumla AI, Assiri A. Middle East respiratory syndrome coronavirus infections in health care workers. *New England Journal of Medicine*. 2013;369(9):884-6.
22. Zhong Q, Liu YY, Luo Q, Zou YF, Jiang HX, Li H, et al. Spinal anaesthesia for patients with coronavirus disease 2019 and possible transmission rates in anaesthetists: retrospective, single-centre, observational cohort study. *British Journal of Anaesthesia*. 2020.
23. Angel L, Kon ZN, Chang SH, Rafeq S, Shekar SP, Mitzman B, et al. Novel Percutaneous Tracheostomy for Critically Ill Patients with COVID-19. *The Annals of Thoracic Surgery*. 2020.
24. Heinzerling A, Stuckey PMJ, Scheuer T, Xu K, Perkins KM, Resseger H, et al. Transmission of COVID-19 to health care personnel during exposures to a hospitalized patient—Solano County, California, February 2020. 2020.
25. Ng K, Poon BH, Puar THK, Quah JLS, Loh WJ, Wong YJ, et al. COVID-19 and the risk to health care workers: a case report. *Annals of internal medicine*. 2020.
26. Nam H-S, Yeon M-Y, Park JW, Hong J-Y, Son JW. Healthcare worker infected with Middle East Respiratory Syndrome during cardiopulmonary resuscitation in Korea, 2015. *Epidemiology and health*. 2017;39.



Supplement 13. Stream 4. Findings of included studies of COVID-19, SARS and MERS Transmission to HCWs Exposed and Not Exposed to Aerosol-Generating Procedures, and Aerosol Generating Procedures as Risk Factors for Transmission (2020 update, n =15) (stream 4)

| Study                              | Findings                                                                                                                                                                                                                                                                                                                                                                                                                                                                                                                                                                                                                                                                                                                                                                                                                                                                                                                                                                                                                                                                                                                                                                                                                                                                                                                                                                                                                                                                  |
|------------------------------------|---------------------------------------------------------------------------------------------------------------------------------------------------------------------------------------------------------------------------------------------------------------------------------------------------------------------------------------------------------------------------------------------------------------------------------------------------------------------------------------------------------------------------------------------------------------------------------------------------------------------------------------------------------------------------------------------------------------------------------------------------------------------------------------------------------------------------------------------------------------------------------------------------------------------------------------------------------------------------------------------------------------------------------------------------------------------------------------------------------------------------------------------------------------------------------------------------------------------------------------------------------------------------------------------------------------------------------------------------------------------------------------------------------------------------------------------------------------------------|
| Buchholz et al., 2013 <b>(57)</b>  | Proportion of acute respiratory illnesses (ARI) in those exposed in the 3rd or 4th week to MERS-CoV was 22% among high risk contacts (“i.e. performing AGPs, face mask rarely/not worn”) and 25% among others (p-value = 0.870)                                                                                                                                                                                                                                                                                                                                                                                                                                                                                                                                                                                                                                                                                                                                                                                                                                                                                                                                                                                                                                                                                                                                                                                                                                           |
| Amer et al., 2018 <b>(67)</b>      | <p>Out of 15 HCWs who contracted MERS-CoV:</p> <ul style="list-style-type: none"> <li>● Performed intubation (n=5);</li> <li>● Performed intubation assistance (n=1);</li> <li>● Connected infected patients on Bilevel positive airway pressure (BiPAP) (n=1).</li> </ul>                                                                                                                                                                                                                                                                                                                                                                                                                                                                                                                                                                                                                                                                                                                                                                                                                                                                                                                                                                                                                                                                                                                                                                                                |
| Alraddadi et al., 2016 <b>(59)</b> | <ul style="list-style-type: none"> <li>● Rate of infection among HCW “always wearing eye protection” and performing the following procedures: direct contact: 1/47 (2.1%); AGPs: 3/62 (4.8)</li> <li>● Rate of infection among HCW “sometimes/never wearing” and performing the following procedures: direct contact: 17/165 (10.3); AGPs: 11/100 (11.0)</li> <li>● Rate of infection among HCW “always covering nose and mouth with medical mask or N95 respirator” and performing the following procedures: direct contact: 11/151 (7.3); AGPs: 8/133 (6.0)</li> <li>● Rate of infection among HCW “sometimes/never covering nose and mouth with medical mask or N95 respirator” and performing the following procedures: direct contact: 7/66 (10.6); AGPs: 6/32 (18.8)</li> <li>● Rate of infection among HCW “always wearing a medical mask” and performing the following procedures: direct contact: 9/69 (13.0); AGPs: 5/81 (6.2)</li> <li>● Rate of infection among HCW “sometimes/never wearing a medical mask” and performing the following procedures: direct contact: 9/142 (6.3); AGPs: 8/76 (10.5)</li> <li>● Rate of infection among HCW “always wearing an N95 respirator” and performing the following procedures: direct contact: 6/116 (5.2); AGPs: 5/90 (5.6)</li> <li>● Rate of infection among HCW “sometimes/never wearing an N95 respirator” and performing the following procedures: direct contact: 12/101 (11.9); AGPs: 9/73 (12.3)</li> </ul> |
| Alanazi et al., 2019 <b>(68)</b>   | <ul style="list-style-type: none"> <li>● Out of 19 HCWs MERS-CoV cases, 5 were on ward A, where index patient was intubated (without airborne precautions in place)</li> <li>● Out of 6 HCWs MERS-CoV cases in Ward B, 4 were present during the intubation procedure on a patient case</li> </ul>                                                                                                                                                                                                                                                                                                                                                                                                                                                                                                                                                                                                                                                                                                                                                                                                                                                                                                                                                                                                                                                                                                                                                                        |

|                                       |                                                                                                                                                                                                                                                                                                                                                                                                                                                                                                                                                                                                                                                                                                                                                                                                                                                                                                                                                                                                                                                                                                                                                                                                                                     |
|---------------------------------------|-------------------------------------------------------------------------------------------------------------------------------------------------------------------------------------------------------------------------------------------------------------------------------------------------------------------------------------------------------------------------------------------------------------------------------------------------------------------------------------------------------------------------------------------------------------------------------------------------------------------------------------------------------------------------------------------------------------------------------------------------------------------------------------------------------------------------------------------------------------------------------------------------------------------------------------------------------------------------------------------------------------------------------------------------------------------------------------------------------------------------------------------------------------------------------------------------------------------------------------|
|                                       | <ul style="list-style-type: none"> <li>● Out of 10 HCWs MERS-CoV cases, 4 reported having been in the same room as a patient case during intubation, and none reported wearing an N95 mask or a powered air purifying respirator</li> </ul>                                                                                                                                                                                                                                                                                                                                                                                                                                                                                                                                                                                                                                                                                                                                                                                                                                                                                                                                                                                         |
| Assiri et al., 2013<br><b>(65)</b>    | A nurse administrator who was present in the ICU during two simultaneous cardiac resuscitations and had face-to-face contact with a febrile HCW developed MERS-CoV infection.                                                                                                                                                                                                                                                                                                                                                                                                                                                                                                                                                                                                                                                                                                                                                                                                                                                                                                                                                                                                                                                       |
| Cai et al., 2020<br><b>(61)</b>       | There was no infection among medical staff (n=9) after bronchoscope-guided endotracheal intubation through nasal insertion (under the three-level protection of positive pressure filter head cover) of a patient with COVID-19.                                                                                                                                                                                                                                                                                                                                                                                                                                                                                                                                                                                                                                                                                                                                                                                                                                                                                                                                                                                                    |
| Folgueira et al., 2020<br><b>(58)</b> | <p>No significant differences in the infection rates of HCWs and hospital personnel between the groups of areas of high, intermediate and low exposure risk*</p> <ul style="list-style-type: none"> <li>● High risk areas* <ul style="list-style-type: none"> <li>○ Rates of infection among HCW: COVID19 hospitalization: 45.26%; ICU: 52.31%; ER: 37.04%; anesthesia: 45.45%</li> <li>○ Mean percentage of infection among HCW: 43.6%</li> </ul> </li> <li>● Intermediate risk areas* <ul style="list-style-type: none"> <li>○ Rates of infection among HCW: surgery: 45.14%; oncology/hematology: 44.29%; medical areas no COVID-19: 37.35%; pediatrics/neonates: 48.62%; OB/GYN: 39.51%; radiology: 37.98%; outpatient consultation: 31.82%</li> <li>○ Mean percentage of infection among HCW: 40.96%</li> </ul> </li> <li>● Low risk areas* <ul style="list-style-type: none"> <li>○ Rates of infection among HCW: administrative areas, clerical, informatics, communication, pharmacy: 55.22%; laboratories: 33.33%; kitchen: 38.30%</li> <li>○ Mean percentage of infection among HCW: 41.92%</li> </ul> </li> </ul> <p>*HCW were classified according to their exposure to infected patients and/or aerosol generation</p> |
| Hall et al., 2014<br><b>(56)</b>      | Out of the total HCWs reporting contact with the MERS-CoV case-patient, 50% were present during airway suction, 29% during nebulizer treatment, 23% during sputum induction, 8% during bronchoscopy, and 6% during intubation. None of the HCWs reporting contact with the MERS-CoV case-patient contracted MERS-CoV.                                                                                                                                                                                                                                                                                                                                                                                                                                                                                                                                                                                                                                                                                                                                                                                                                                                                                                               |
| Hunter et al., 2016<br><b>(69)</b>    | <p>5 HCWs out of the 14 HCW MERS-CoV cases had an interaction with a patient case through a potential AGP as follows:</p> <ul style="list-style-type: none"> <li>● Manipulation of cannula or oxygen mask (n = 3);</li> <li>● Administration of inhaler or nebulizer treatment (n = 2);</li> <li>● Intubation (n = 1);</li> <li>● Suctioning before intubation (n= 1).</li> </ul>                                                                                                                                                                                                                                                                                                                                                                                                                                                                                                                                                                                                                                                                                                                                                                                                                                                   |
| Memish et al., 2013<br><b>(70)</b>    | <p>Out of the 7 HCW MERS-CoV cases:</p> <ul style="list-style-type: none"> <li>● Exposed to intubation (n=5);</li> </ul>                                                                                                                                                                                                                                                                                                                                                                                                                                                                                                                                                                                                                                                                                                                                                                                                                                                                                                                                                                                                                                                                                                            |

|                               |                                                                                                                                                                                                                                                                                                                                                                                                                                                                                                                                                                                                                              |
|-------------------------------|------------------------------------------------------------------------------------------------------------------------------------------------------------------------------------------------------------------------------------------------------------------------------------------------------------------------------------------------------------------------------------------------------------------------------------------------------------------------------------------------------------------------------------------------------------------------------------------------------------------------------|
|                               | <ul style="list-style-type: none"> <li>Exposed to airway suctioning (n=4);</li> <li>Exposed to sputum induction (n=2).</li> </ul>                                                                                                                                                                                                                                                                                                                                                                                                                                                                                            |
| Zhong et al., 2020 (64)       | <p>COVID-19 infection was confirmed by PCR in 11.4% of anaesthetists (5/44)</p> <ul style="list-style-type: none"> <li>Of 37 anaesthetists who wore Category 3 PPE, one (2.7%) developed PCR-confirmed COVID-19 compared with 4/7 (57.1%) anaesthetists who had Category 1 protection in the operating theatre (RRR: 95.3%, 95% CI: 63.7-99.4; p-value &lt;0.01).</li> </ul>                                                                                                                                                                                                                                                 |
| Angel et al., 2020 (62)       | <ul style="list-style-type: none"> <li>None of the eight team members who participated across 98 bedside percutaneous tracheostomies using a novel technique (including 4 who agreed to test via nasal pharyngeal swab for RT-PCR assay testing) developed any COVID-19 symptoms (fever, general malaise, cough, shortness of breath) or tested positive for COVID-19.</li> <li>Additional nurses, respiratory and physical therapists providing care to the COVID-19 patients post tracheostomy did not develop any symptoms (fever, general malaise, cough, shortness of breath) or test positive for COVID-19.</li> </ul> |
| Heinzerling et al., 2020 (60) | <ul style="list-style-type: none"> <li>Among 43 HCW who were exposed (95% were at high or medium risk exposure<sup>1</sup>), three were positive for COVID-19.</li> <li>Being present for or assisting with nebulizer treatments was more common among HCWs who developed COVID-19 (67%) than among those who did not (9%) (p = 0.04).</li> <li>Being present for or assisting with BiPAP was more common among HCWs with COVID-19 (p = 0.06).</li> <li>The median duration of exposure during AGPs was higher among HCWs with NCoV (95 minutes) than among those without NCoV (0 minutes) (p = 0.13).</li> </ul>            |
| Ng et al., 2020 (63)          | <p>41 HCWs were identified as having exposure to AGPs (included endotracheal intubation, extubation, noninvasive ventilation, and exposure to aerosols in an open circuit) for at least 10 minutes at a distance of less than 2 meters from the index patient. None of the exposed HCWs developed symptoms and all had negative PCR test results (85% of HCWs were exposed during an AGP while wearing a surgical mask, and the remainder were wearing N-95 masks).</p>                                                                                                                                                      |
| Nam et al., 2017 (66)         | <p>The interviewed nurse tested positive for MERS. She stayed in the case patient room for 3 hours (1 hour for CPR). Large amount of body fluids splashed on the nurses' PPE during the CPR. The nurse touched the mask and goggle with her hands in contaminated gloves. One of the routes hypothesized for transmission was aerosolization during CPR.</p>                                                                                                                                                                                                                                                                 |

<sup>1</sup> Risk based on factors such as exposure to the patient during AGPs, personal protective equipment use, and source control



Supplement 14. Ongoing studies regarding non-invasive ventilation, aerosol generating procedures and COVID-19

| <b>Trial ID</b>     | <b>Public title</b>                                                                                                                                                                                                                                      | <b>Study type</b>                   | <b>Intervention</b>                                                                                |
|---------------------|----------------------------------------------------------------------------------------------------------------------------------------------------------------------------------------------------------------------------------------------------------|-------------------------------------|----------------------------------------------------------------------------------------------------|
| ChiCTR2000030763    | A Medical Records Based analysis for Risk Factors for Outcomes After Respiratory Support in Patients with ARDS Due to Novel Coronavirus Pneumonia (COVID-19)                                                                                             | Observational                       | No specific intervention.                                                                          |
| ChiCTR2000030753    | A medical records based analysis of the Incidence and Risk Factors of Ventilator-associated Pneumonia in ARDS Patients with Novel Coronavirus Pneumonia (COVID-19)                                                                                       | Observational                       | No specific intervention.                                                                          |
| ChiCTR2000031836    | A Medical Records Based study for the Clinical Characteristics Of Hospitalized Novel Coronavirus Pneumonia (COVID-19) Patients With Acute Respiratory Distress Syndrome                                                                                  | Observational                       | No specific intervention.                                                                          |
| ChiCTR2000029739    | A Multicenter, Randomized, Parallel Controlled Clinical Study of Hydrogen-Oxygen Nebulizer to Improve the Symptoms of Patients With Novel Coronavirus Pneumonia (COVID-19)                                                                               | Interventional                      | Experimental group: Hydrogen-Oxygen Nebulizer.<br>Control group: Oxygen concentrator.              |
| NCT04347993         | A Prospective "Universal" Observational Database for COVID-19                                                                                                                                                                                            | Observational<br>[Patient Registry] | No specific intervention.                                                                          |
| NCT04307459         | Acute Respiratory Failure and COVID-19 in Real Life                                                                                                                                                                                                      | Observational                       | Other: standard operating procedures                                                               |
| ACTRN12620000472976 | Adapting the Decathlon Group Easybreathe® snorkelling face mask for the safer administration of oxygen and/or continuous positive airway pressure and in the intra/interhospital transportation of patients with proven or suspected COVID 19 infection. | Interventional                      | Novel mask (the Decathlon group EasyBreathe snorkel mask)                                          |
| NCT04347941         | Awake Prone Positioning to Reduce Invasive VEntilation in COVID-19 Induced Acute Respiratory failure                                                                                                                                                     | Interventional                      | Procedure: Prone Positioning;<br>Procedure: Standard of care.                                      |
| NCT04331366         | Bidirectional Oxygenation Valve in the Management of Pulmonary Complications of COVID-19                                                                                                                                                                 | Interventional                      | Device: GO2 PEEP MOUTHPIECE                                                                        |
| ChiCTR2000031227    | Clinical features and prognosis of invasive mechanical ventilation patients with novel coronavirus pneumonia (COVID-19) in Wuhan, China: a single-centered, retrospective, observational study                                                           | Observational                       | No applicable (case series)                                                                        |
| NCT04320056         | Closed-Loop Oxygen to Verify That Healthcare Workers Interventions Decrease During Pneumonia                                                                                                                                                             | Interventional                      | Other: Standard administration of oxygen flow;<br>Device: Automated oxygen administration - FreeO2 |

Supplement 14. Ongoing studies regarding non-invasive ventilation, aerosol generating procedures and COVID-19

|                      |                                                                                                          |                |                                                                                                                                                                                                                                                                                                                                                                                                                                                                                                                                                                                                                                            |
|----------------------|----------------------------------------------------------------------------------------------------------|----------------|--------------------------------------------------------------------------------------------------------------------------------------------------------------------------------------------------------------------------------------------------------------------------------------------------------------------------------------------------------------------------------------------------------------------------------------------------------------------------------------------------------------------------------------------------------------------------------------------------------------------------------------------|
| NL8521               | Continuous positive airway pressure in severe Covid-19 pneumonia                                         | Interventional | <p>1. Oxygen delivery via a nonrebreathing mask (current standard of care) with sufficient inflow of O<sub>2</sub> (which does not create PEEP).</p> <p>2. Oxygen delivery via the adapted face mask with zero PEEP in order to test the effect of the mask alone.</p> <p>3. Oxygen delivery via the adapted face mask with PEEP of 7.5 cmH<sub>2</sub>O in order to test effect of moderate PEEP.</p>                                                                                                                                                                                                                                     |
| NCT04344730          | Dexamethasone and Oxygen Support Strategies in ICU Patients With Covid-19 Pneumonia                      | Interventional | <p>Drug: Dexamethasone injection;</p> <p>Drug: placebo;</p> <p>Procedure: conventional oxygen;</p> <p>Procedure: CPAP;</p> <p>Procedure: HFNO;</p> <p>Procedure: mechanical ventilation</p>                                                                                                                                                                                                                                                                                                                                                                                                                                                |
| NCT04326075          | Early CPAP in COVID Patients With Respiratory Failure.                                                   | Interventional | Device: CPAP treatment                                                                                                                                                                                                                                                                                                                                                                                                                                                                                                                                                                                                                     |
| NCT04323878          | Early CPAP in COVID Patients With Respiratory Failure. A Prospective Cohort Study.                       | Observational  | No applicable (case series)                                                                                                                                                                                                                                                                                                                                                                                                                                                                                                                                                                                                                |
| NCT04325906          | Early PP With HFNC Versus HFNC in COVID-19 Induced Moderate to Severe ARDS                               | Interventional | <p>Device: high flow nasal cannula (HFNC)</p> <p>Procedure: Prone positioning (PP)</p>                                                                                                                                                                                                                                                                                                                                                                                                                                                                                                                                                     |
| IRCT20180129038542N1 | Early tracheostomy in COVID-19                                                                           | interventional | <p>Intervention group: Patients in this group received medications for the treatment of COVID-19 based on the Fifth Edition of the Novel Corona Virus Guidelines, in addition they indicated for mechanical ventilation and the airway management was selected using the tracheotomy tube within 3 days from intubation.</p> <p>Intervention</p> <p>Control group: Patients in this group received medications for the treatment of COVID-19 based on the Fifth Edition of the Novel Corona Virus Guidelines, in addition they indicated for mechanical ventilation and the airway management was selected using the Orotracheal tube.</p> |
| ChiCTR2000032011     | Efficacy and Safety of Hyperbaric Oxygen Therapy to patients with novel coronavirus pneumonia (COVID-19) | Interventional | <p>1.5ATA:1.5ATA HBO;</p> <p>2.5ATA:2.5ATA HBO;</p>                                                                                                                                                                                                                                                                                                                                                                                                                                                                                                                                                                                        |

Supplement 14. Ongoing studies regarding non-invasive ventilation, aerosol generating procedures and COVID-19

|                  |                                                                                                                                                                          |                |                                                                                                                                                                                                                                                                                                                                                                                                                                                                                                                                               |
|------------------|--------------------------------------------------------------------------------------------------------------------------------------------------------------------------|----------------|-----------------------------------------------------------------------------------------------------------------------------------------------------------------------------------------------------------------------------------------------------------------------------------------------------------------------------------------------------------------------------------------------------------------------------------------------------------------------------------------------------------------------------------------------|
|                  |                                                                                                                                                                          |                | Control group: Routine treatment;                                                                                                                                                                                                                                                                                                                                                                                                                                                                                                             |
| NCT04336462      | Hydrogen-Oxygen Generator With Nebulizer in the Improvement of Symptoms in Patients Infected With COVID-19                                                               | Interventional | Device: oxyhydrogen;<br>Device: Oxygen                                                                                                                                                                                                                                                                                                                                                                                                                                                                                                        |
| NCT04332081      | Hyperbaric Oxygen for COVID-19 Patients                                                                                                                                  | Interventional | Device: hyperbaric oxygen therapy (HBOT)                                                                                                                                                                                                                                                                                                                                                                                                                                                                                                      |
| NCT04343183      | Hyperbaric Oxygen Therapy (HBOT) as a Treatment for COVID-19 (COVID-19) Infection                                                                                        | Interventional | Device: Hyperbaric Oxygen Therapy                                                                                                                                                                                                                                                                                                                                                                                                                                                                                                             |
| NCT04358926      | Hyperbaric Oxygen Therapy Effect in COVID-19 RCT (HBOTCOVID19)                                                                                                           | Interventional | Device: Hyperbaric oxygen therapy;<br>Device: Normobaric oxygen therapy                                                                                                                                                                                                                                                                                                                                                                                                                                                                       |
| ChiCTR2000030322 | Identification and Clinical Treatment of Severe novel coronavirus pneumonia (COVID-19) Patients                                                                          | Observational  | Light and common type group: Conventional treatment;<br>Severe group: Conventional treatment;<br>Western medicine treatment group: Give routine western medicine treatment;<br>Chinese and western medicine combined treatment group: Traditional Chinese medicine is combined with conventional western medicine treatment.;<br>Non-invasive mechanical ventilation group: Give noninvasive mechanical ventilation and respiratory support;<br>Nasal high flow oxygen therapy group: Give nasal high flow oxygen therapy respiratory support |
| NCT04363463      | Impact of Prone Position in Patients Under Spontaneous Breathing on Intubation or Non-invasive Ventilation or Death Incidence During COVID-19 Acute Respiratory Distress | Interventional | Other: prone position                                                                                                                                                                                                                                                                                                                                                                                                                                                                                                                         |
| NCT04346420      | Impact of the Double-Trunk Mask on Oxygenation Titration in COVID-19                                                                                                     | Interventional | Other: Standard interface;<br>Device: Double-Trunk Mask                                                                                                                                                                                                                                                                                                                                                                                                                                                                                       |
| NCT04344431      | Management by Hyperbaric Oxygen Therapy of Patients With Hypoxaemic Pneumonia With SARS-CoV-2 (COVID-19)                                                                 | Interventional | Combination Product: Hyperbaric oxygen treatment (HBOT) i.e. inhalation of pressurized oxygen delivered by a hyperbaric chamber (drug/device)                                                                                                                                                                                                                                                                                                                                                                                                 |
| NCT04368923      | Management of Covid-19 Patients During Home Isolation                                                                                                                    | Interventional | Device: Oxygen Therapy<br>Procedure: Physical Therapy                                                                                                                                                                                                                                                                                                                                                                                                                                                                                         |

Supplement 14. Ongoing studies regarding non-invasive ventilation, aerosol generating procedures and COVID-19

|                  |                                                                                                                                                      |                |                                                                                                                                                                                                                                                                                                                                                                                                               |
|------------------|------------------------------------------------------------------------------------------------------------------------------------------------------|----------------|---------------------------------------------------------------------------------------------------------------------------------------------------------------------------------------------------------------------------------------------------------------------------------------------------------------------------------------------------------------------------------------------------------------|
| ChiCTR2000029658 | Nasal high-flow preoxygenation assisted fibre-optic bronchoscope intubation in patients with critical novel coronavirus pneumonia (COVID-19)         | Interventional | Experimental group: high-flow therapy by nasal cannulae (HFNC);<br>Control group: bag- valve mask oxygenation (SMO)                                                                                                                                                                                                                                                                                           |
| NCT04342104      | NIV and CPAP Failure Predictors in COVID-19 Associated Respiratory Failure                                                                           | Observational  | Other: Monitoring for aggravation;<br>Other: Evaluate HACOR score effectivity in these patients                                                                                                                                                                                                                                                                                                               |
| NCT04344925      | Non Invasive Positive Pressure Ventilation to Minimize Aerosolization for COVID 19                                                                   | Observational  | Device: Aerosol-reducing Mask;<br>Device: Standard Mask                                                                                                                                                                                                                                                                                                                                                       |
| ChiCTR2000030741 | Observational Study for Prone Position Ventilation and Conventional Respiratory Support in ARDS Patients with Novel Coronavirus Pneumonia (COVID-19) | Observational  | Transnasal high-flow oxygen therapy: prone position ventilation;<br>Noninvasive mechanical ventilation: prone position ventilation;<br>Invasive mechanical ventilation: prone position ventilation;                                                                                                                                                                                                           |
| NCT04346342      | PRactice of VENTilation in COVID-19 Patients (PRoVENT-COVID)                                                                                         | Observational  | No applicable (case series)                                                                                                                                                                                                                                                                                                                                                                                   |
| NCT04358939      | Prone Position in Patients on High-flow Nasal Oxygen Therapy for COVID-19 (HIGH-PRONE-COVID-19)                                                      | Interventional | Other: Prone decubitus                                                                                                                                                                                                                                                                                                                                                                                        |
| NCT04366856      | PROne Positioning in coVID-19 Oxygeno-dependent Patients in Spontaneous Ventilation (PROVID Study)                                                   | Interventional | Behavioral: 1: Prone positioning;<br>Behavioral: 2: No instruction regarding positioning                                                                                                                                                                                                                                                                                                                      |
| NCT04345536      | Prospective Quality Register of Patients With Confirmed Covid-19 at Oslo University Hospital                                                         | Observational  | No applicable (case series)                                                                                                                                                                                                                                                                                                                                                                                   |
| ISRCTN16912075   | RECOVERY Respiratory Support: Respiratory Strategies in patients with coronavirus COVID-19 CPAP, high-flow nasal oxygen, and standard care           | Interventional | Arm 1: Continuous positive airway pressure (CPAP), administered according to local protocol/guidelines. Administration will be left to clinical discretion.<br>Arm 2: High flow nasal oxygen (HFNO) will be administered according to local protocol/guidelines. Administration will be left to clinical discretion.<br>Arm 3: Standard care. Standard oxygen therapy according to local protocol/guidelines. |
| DRKS00021506     | Registry of hospitalized pediatric Patients with SARS-CoV-2 infection (COVID-19)                                                                     | Observational  | No applicable (case series)                                                                                                                                                                                                                                                                                                                                                                                   |



Supplement 14. Ongoing studies regarding non-invasive ventilation, aerosol generating procedures and COVID-19

|                     |                                                                                                                                                                                                                                |                |                                                                                                 |
|---------------------|--------------------------------------------------------------------------------------------------------------------------------------------------------------------------------------------------------------------------------|----------------|-------------------------------------------------------------------------------------------------|
| NCT04369274         | Repeated Measures Trial of Temporary Automated Manual Ventilation Versus Noninvasive Oxygenation or Conventional Vent                                                                                                          | Interventional | Device: Mechanical ventilation with the automated BVM compressor                                |
| NCT04327505         | Safety and Efficacy of Hyperbaric Oxygen for ARDS in Patients With COVID-19                                                                                                                                                    | Interventional | Drug: Hyperbaric oxygen                                                                         |
| NCT04298814         | Safety Related Factors of Endotracheal Intubation in Patients With Severe Covid-19 Pneumonia                                                                                                                                   | Observational  | Other: severe covid-19 pneumonia with ET                                                        |
| NCT04312100         | Sequential Oxygen Therapy Strategy for Patients With COVID-19                                                                                                                                                                  | Observational  | Other: oxygen treatment                                                                         |
| ChiCTR2000030056    | Study for the effect of early endotracheal intubation on the outcome of novel coronavirus pneumonia (COVID-19) patients                                                                                                        | Observational  | No applicable (case series)                                                                     |
| ChiCTR2000030855    | Study for the effect of external diaphragmatic pacing assisted invasive ventilation and weaning in patients with severe novel coronavirus pneumonia (COVID-19)                                                                 | Interventional | external diaphragmatic pacing assisted invasive ventilation                                     |
| ChiCTR2000030485    | Study for timing of mechanical ventilation for critically ill patients with novel coronavirus pneumonia (COVID-19): A medical records based retrospective Cohort study                                                         | Observational  | Group 2: conservation mechanical ventilation group; Group 1: aggressive mechanical ventilation; |
| ChiCTR2000030831    | The analysis of related factors on improving oxygenation status by endotracheal intubation ventilation in severe patients suffered from novel coronavirus pneumonia (COVID-19): a single center and descriptive study in Wuhan | Observational  | external diaphragmatic pacing assisted invasive ventilation                                     |
| NCT04326452         | Treating COVID-19 With a Bidirectional Oxygenation Valve                                                                                                                                                                       | Interventional | Device: bidirectional oxygenation mouthpiece                                                    |
| NCT04376580         | Use of the Nasal Cannula During COVID-19                                                                                                                                                                                       | Observational  | No applicable (case series)                                                                     |
| CTRI/2020/04/024473 | Viral Infection and Respiratory illness Universal Study                                                                                                                                                                        | Observational  | No applicable (case series)                                                                     |
| NCT04323787         | Viral Infection and Respiratory Illness Universal Study[VIRUS]: COVID-19 Registry                                                                                                                                              | Observational  | No applicable (case series)                                                                     |
